# Supplementary material for: Chromosomal copy number variation analysis by next generation sequencing confirms ploidy stability in Trypanosoma brucei subspecies
Source: PubMed Central journal article supplement (PMC6249438; doi:10.1099/mgen.0.000223), 2018-09-27

**Supplementary Figure 1: PCA of *T. brucei* isolates' genomic distance based on differential SNPs.** The genomic distance estimated by three dimension principal component analysis of the 26 *T. brucei* isolates is shown in different angles. This three dimensional representation comprises 47.2% of the variability observed in the evaluated *T. brucei* Isolates. *T. b. rhodesiense* isolates are represented in blue, while *T. b. brucei* are in red, and *T. b. gambiense* in green. The black circle correspond to the *T. b. brucei* 927 reference genome, used as template in the SNP calling. The red arrow points to the D11 isolate, the only potentially trisomic *T. brucei* isolate evaluated.

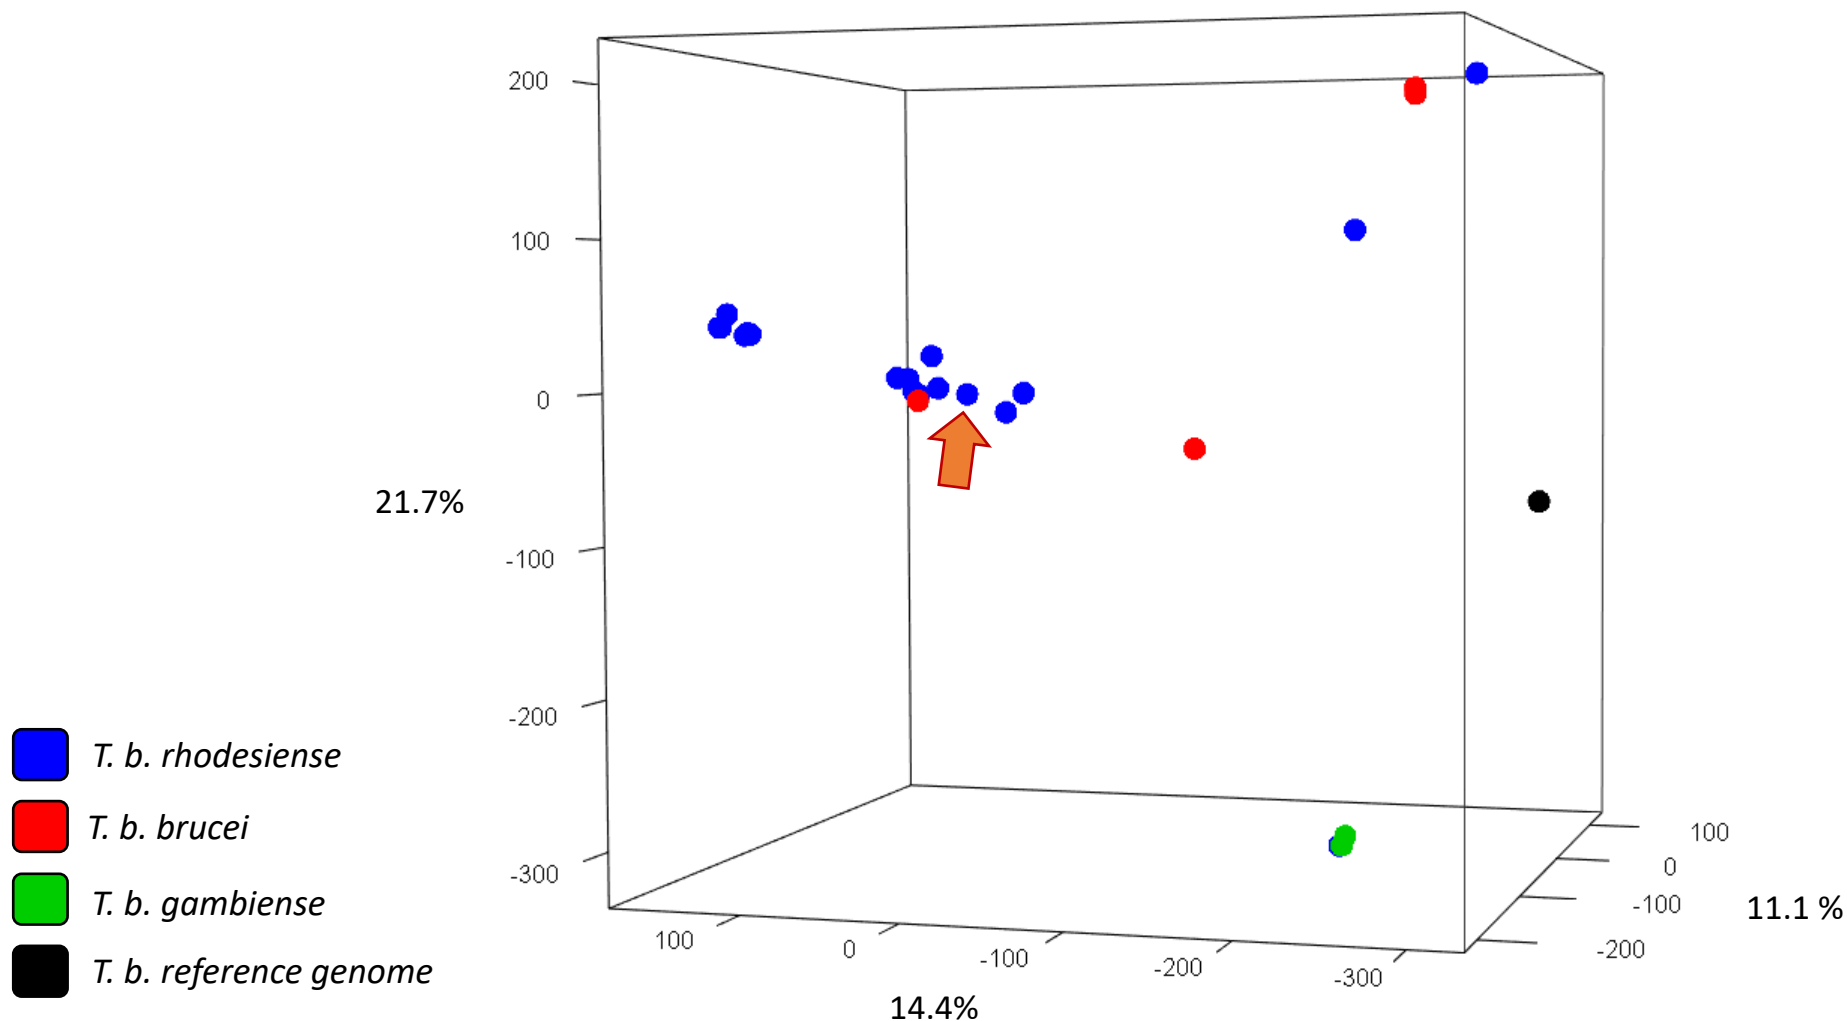

**Supplementary Figure 1: PCA of *T. brucei* isolates' genomic distance based on differential SNPs.** The genomic distance estimated by three dimension principal component analysis of the 26 *T. brucei* isolates is shown in different angles. This three dimensional representation comprises 47.2% of the variability observed in the evaluated *T. brucei* Isolates. *T. b. rhodesiense* isolates are represented in blue, while *T. b. brucei* are in red, and *T. b. gambiense* in green. The black circle correspond to the *T. b. brucei* 927 reference genome, used as template in the SNP calling. The red arrow points to the D11 isolate, the only potentially trisomic *T. brucei* isolate evaluated.

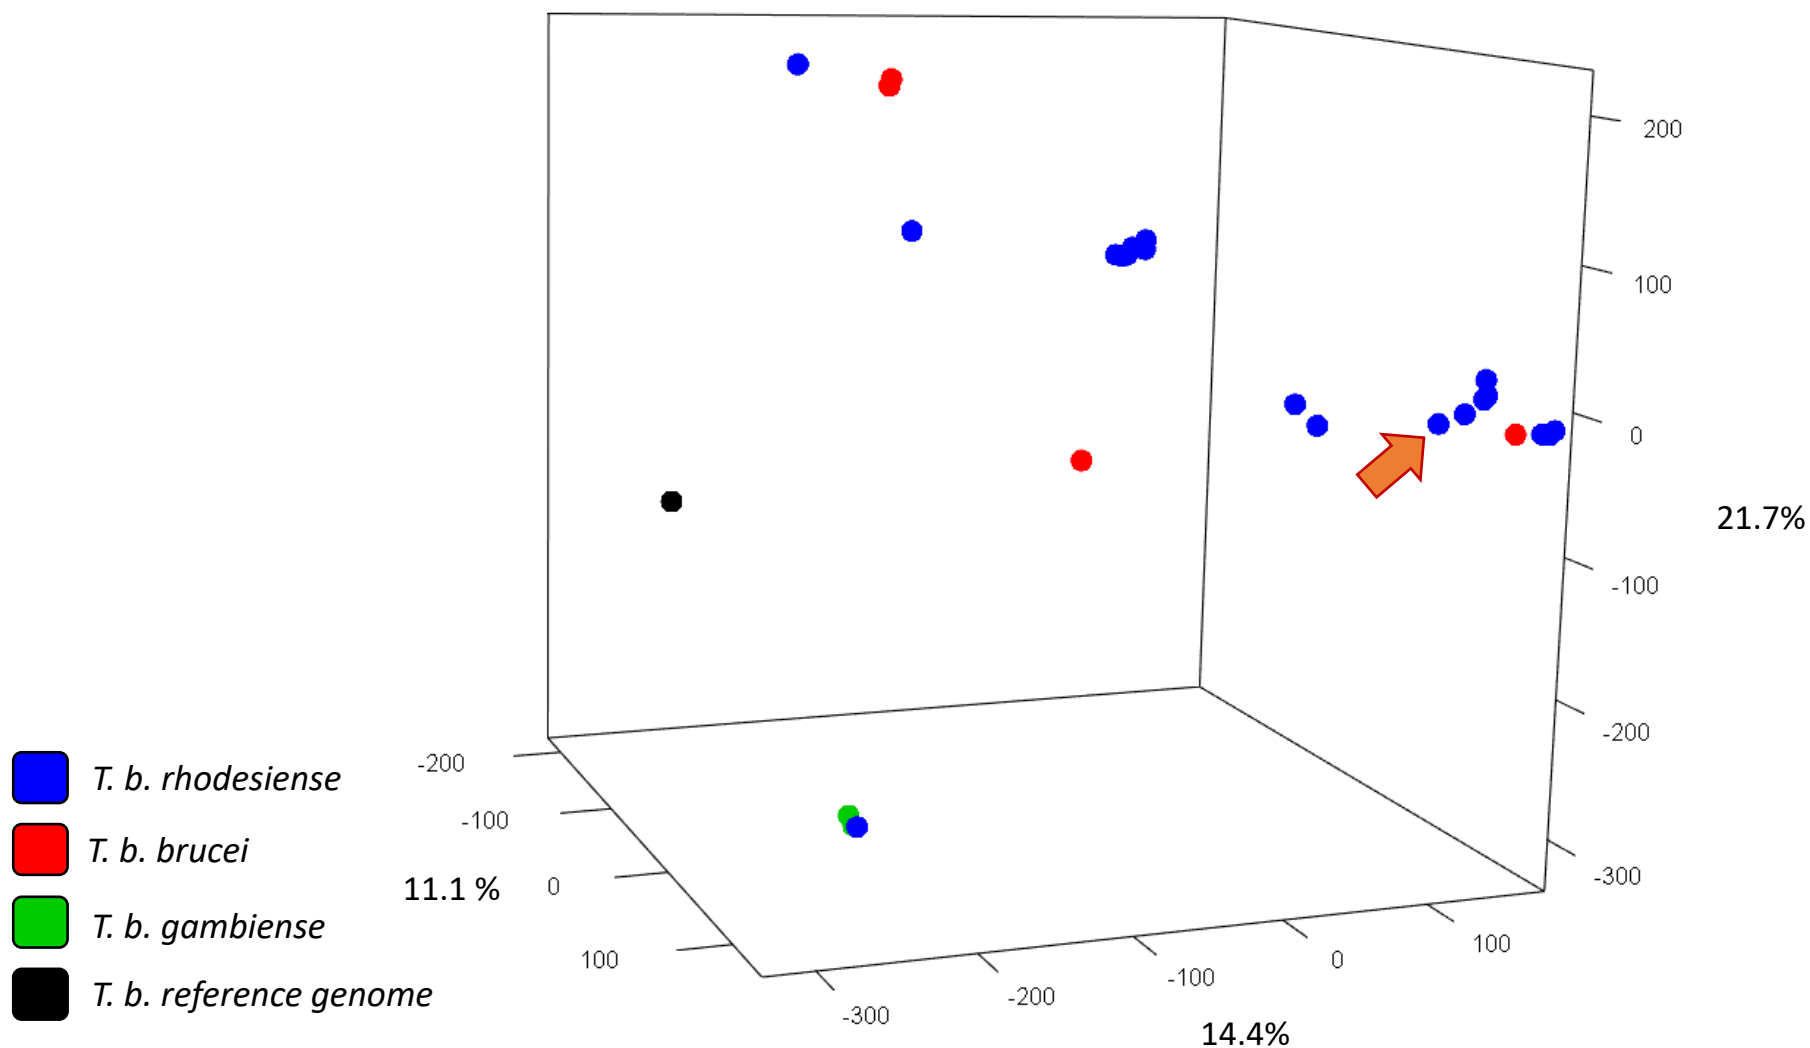

**Supplementary Figure 1: PCA of *T. brucei* isolates' genomic distance based on differential SNPs.** The genomic distance estimated by three dimension principal component analysis of the 26 *T. brucei* isolates is shown in different angles. This three dimensional representation comprises 47.2% of the variability observed in the evaluated *T. brucei* Isolates. *T. b. rhodesiense* isolates are represented in blue, while *T. b. brucei* are in red, and *T. b. gambiense* in green. The black circle correspond to the *T. b. brucei* 927 reference genome, used as template in the SNP calling. The red arrow points to the D11 isolate, the only potentially trisomic *T. brucei* isolate evaluated.

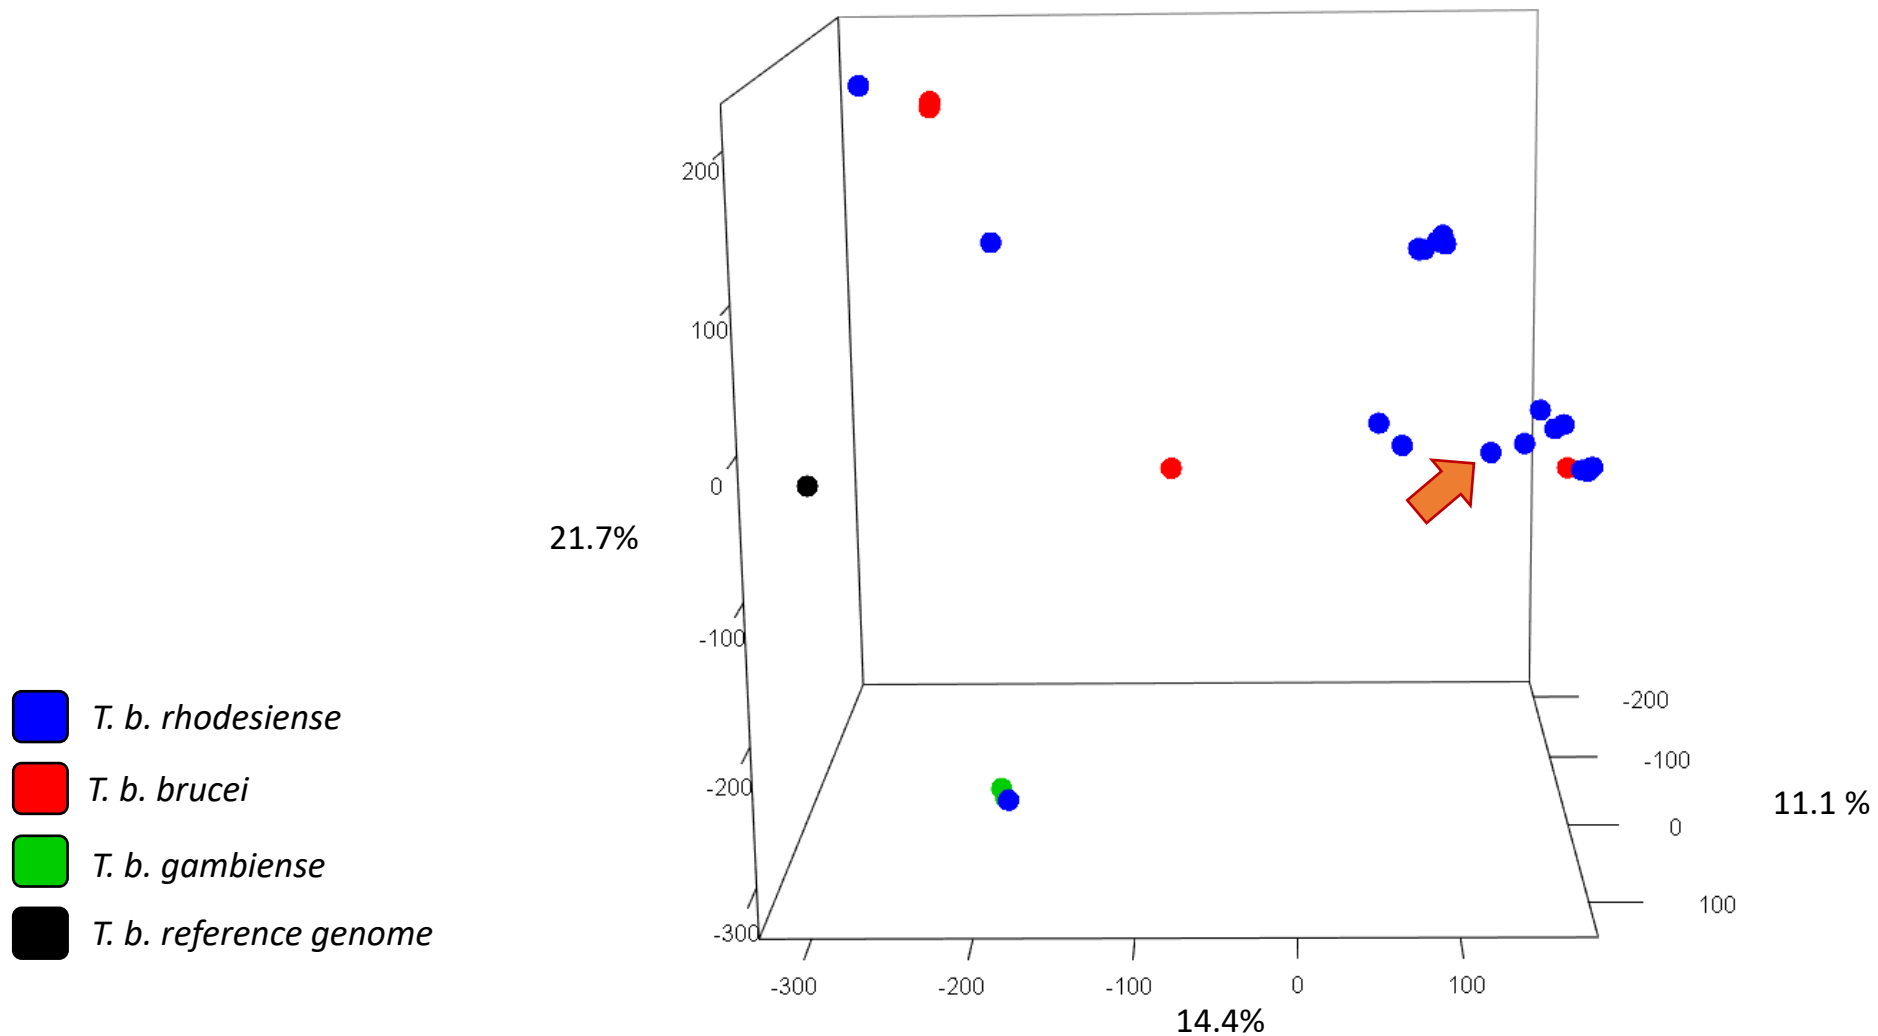

**Supplementary Figure 1: PCA of *T. brucei* isolates' genomic distance based on differential SNPs.** The genomic distance estimated by three dimension principal component analysis of the 26 *T. brucei* isolates is shown in different angles. This three dimensional representation comprises 47.2% of the variability observed in the evaluated *T. brucei* Isolates. *T. b. rhodesiense* isolates are represented in blue, while *T. b. brucei* are in red, and *T. b. gambiense* in green. The black circle correspond to the *T. b. brucei* 927 reference genome, used as template in the SNP calling. The red arrow points to the D11 isolate, the only potentially trisomic *T. brucei* isolate evaluated.

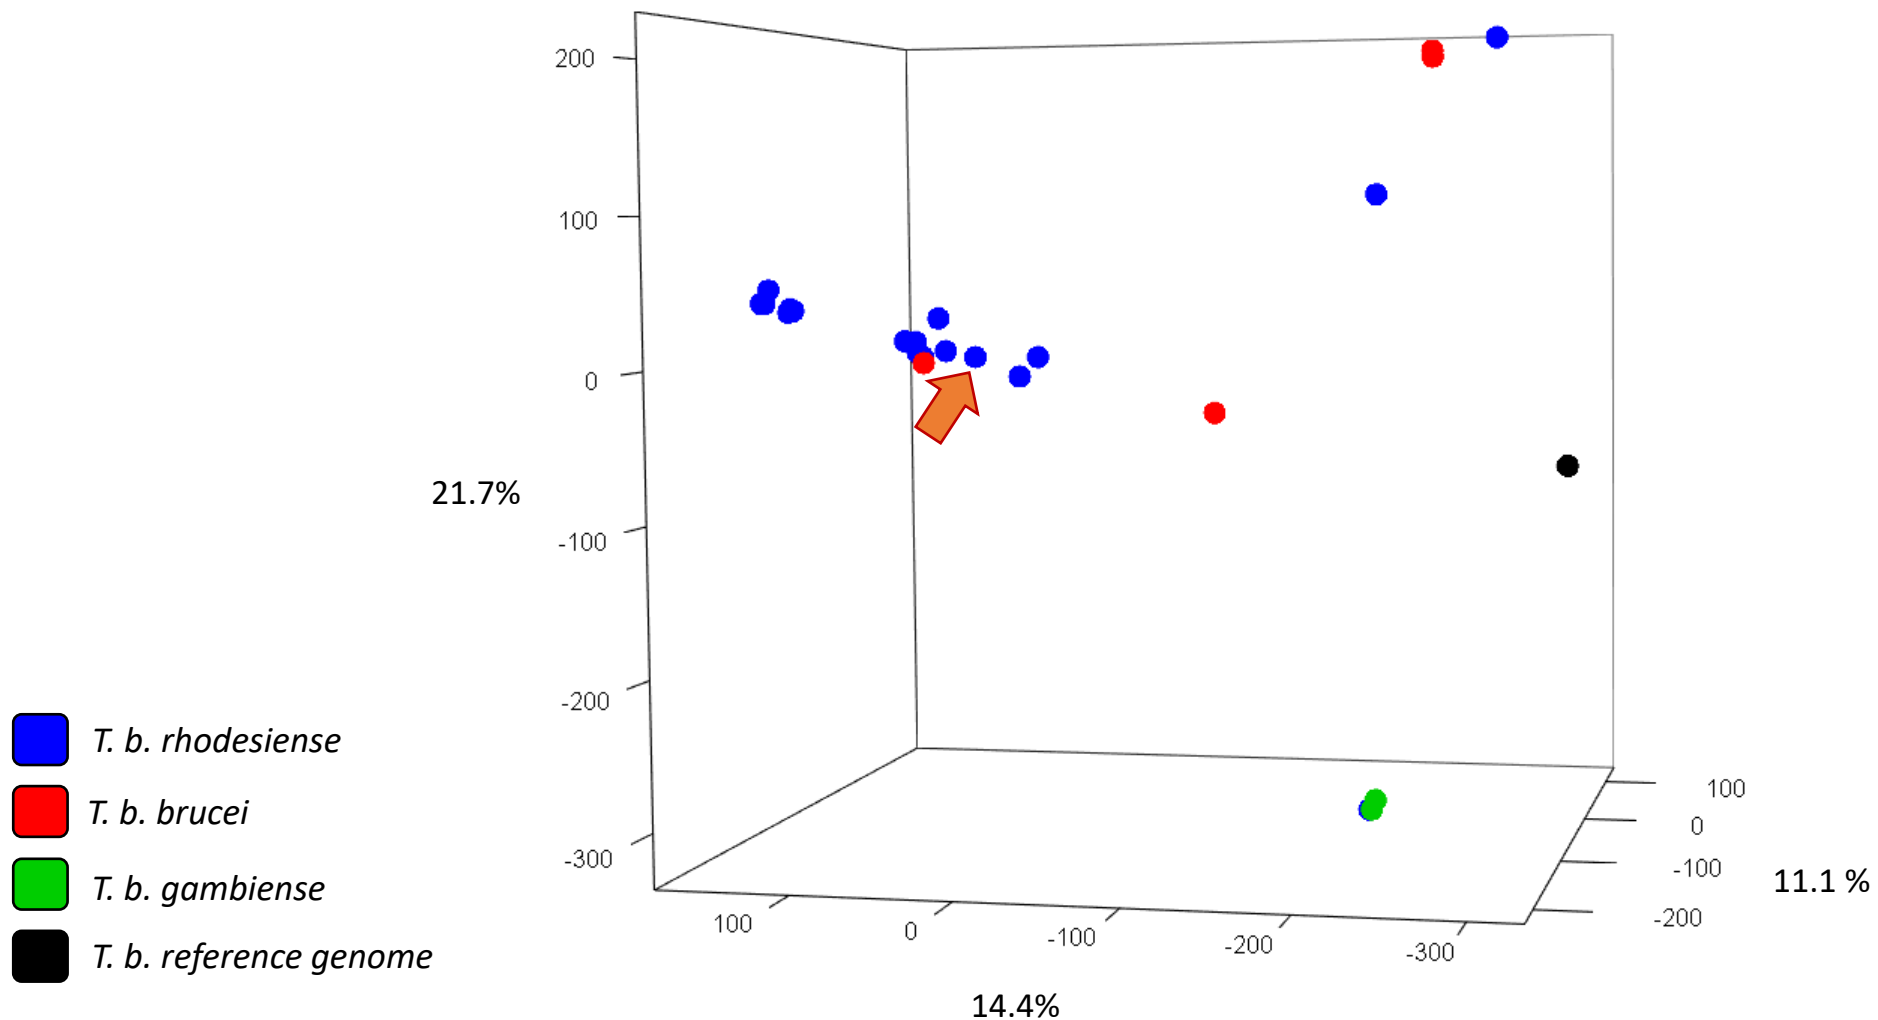

**Supplementary Figure 1: PCA of *T. brucei* isolates' genomic distance based on differential SNPs.** The genomic distance estimated by three dimension principal component analysis of the 26 *T. brucei* isolates is shown in different angles. This three dimensional representation comprises 47.2% of the variability observed in the evaluated *T. brucei* Isolates. *T. b. rhodesiense* isolates are represented in blue, while *T. b. brucei* are in red, and *T. b. gambiense* in green. The black circle correspond to the *T. b. brucei* 927 reference genome, used as template in the SNP calling. The red arrow points to the D11 isolate, the only potentially trisomic *T. brucei* isolate evaluated.

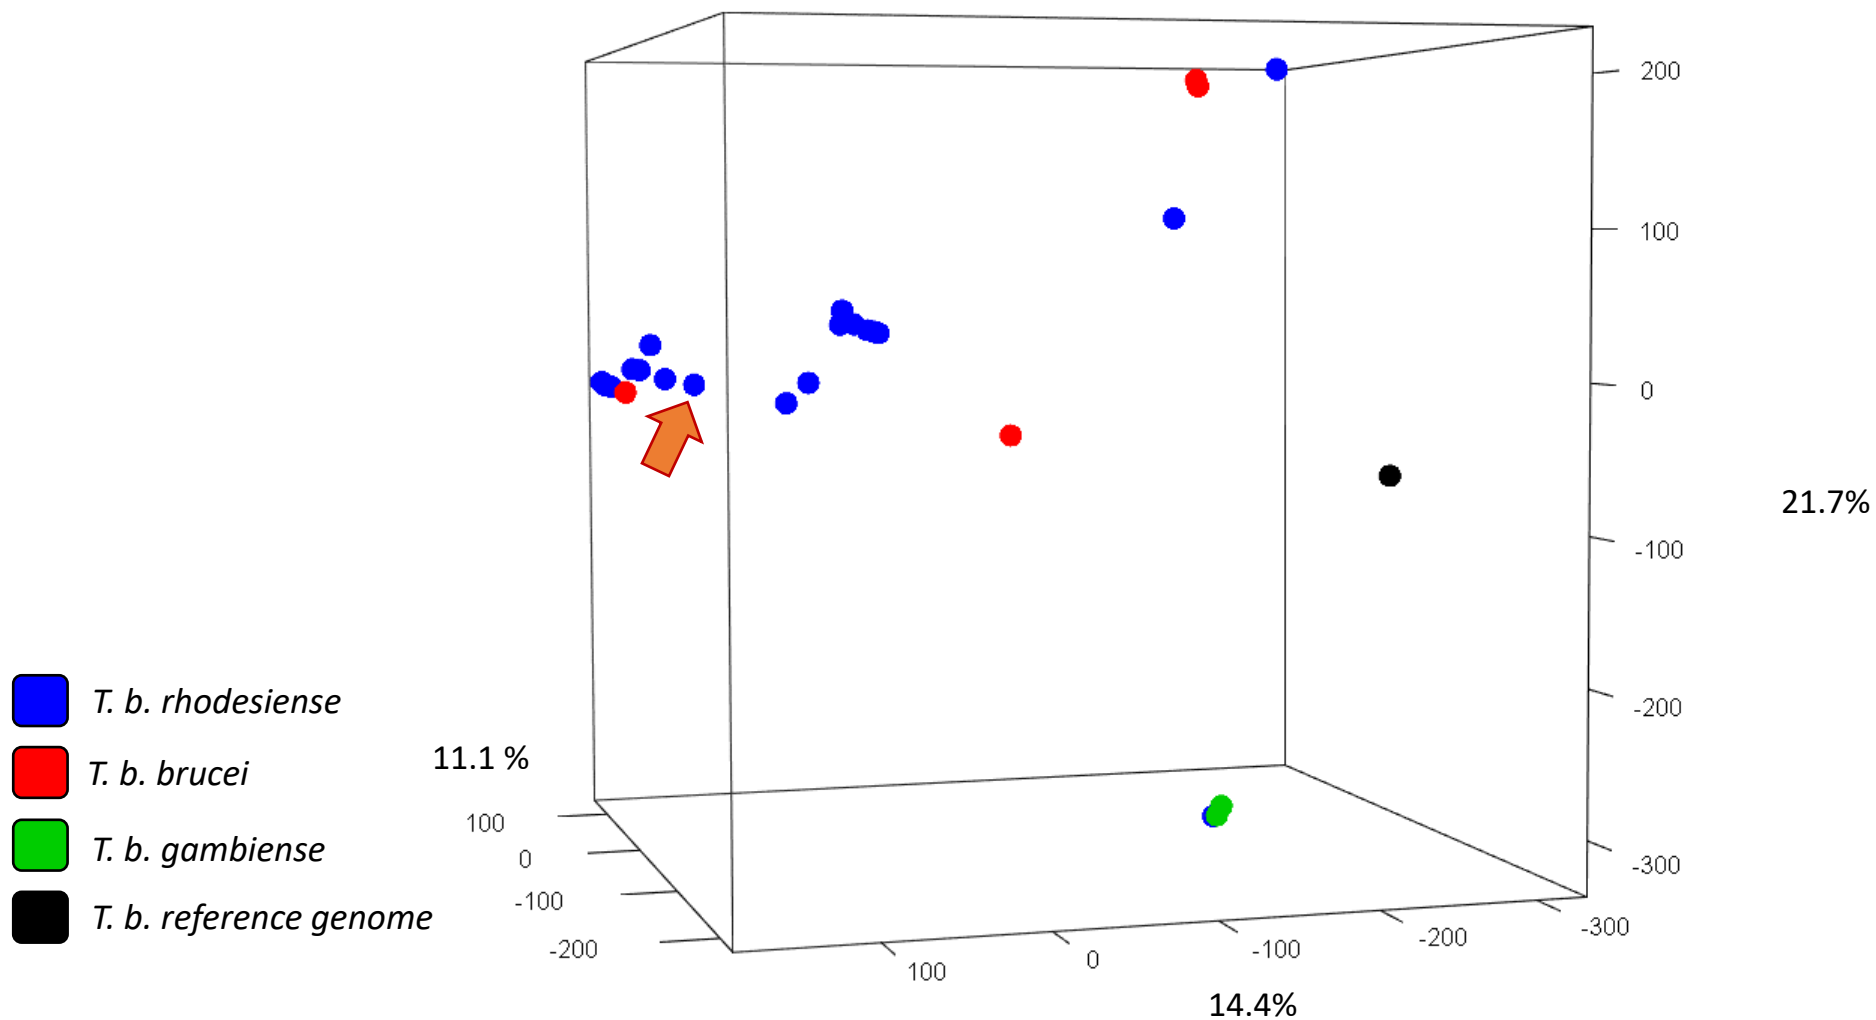

**Supplementary Figure 2: Impact of the genome coverage in allele frequency ploidy estimations.** To evaluate the impact of the genome coverage in the allele frequency ploidy estimations, we evaluated the allele frequency of the D11 isolate using 25% **(A)**, 50% **(B)**, or 75% **(C)** of its reads, corresponding to the genome coverages of 6.92, 13.84 and 20.76x, respectively. The peaks in 0.33 and 0.66 that are suggestive of partial triploidy are observed with  $\sim 20x$  coverage, similarly to what is observed with 100% of the reads **(D)**. From the 26 *T. brucei* samples evaluated, only D1 **(E)** and ytat **(F)** had coverages lower than 20x, but only D11 had peaks suggestive of partial triploidy in the parasite population.

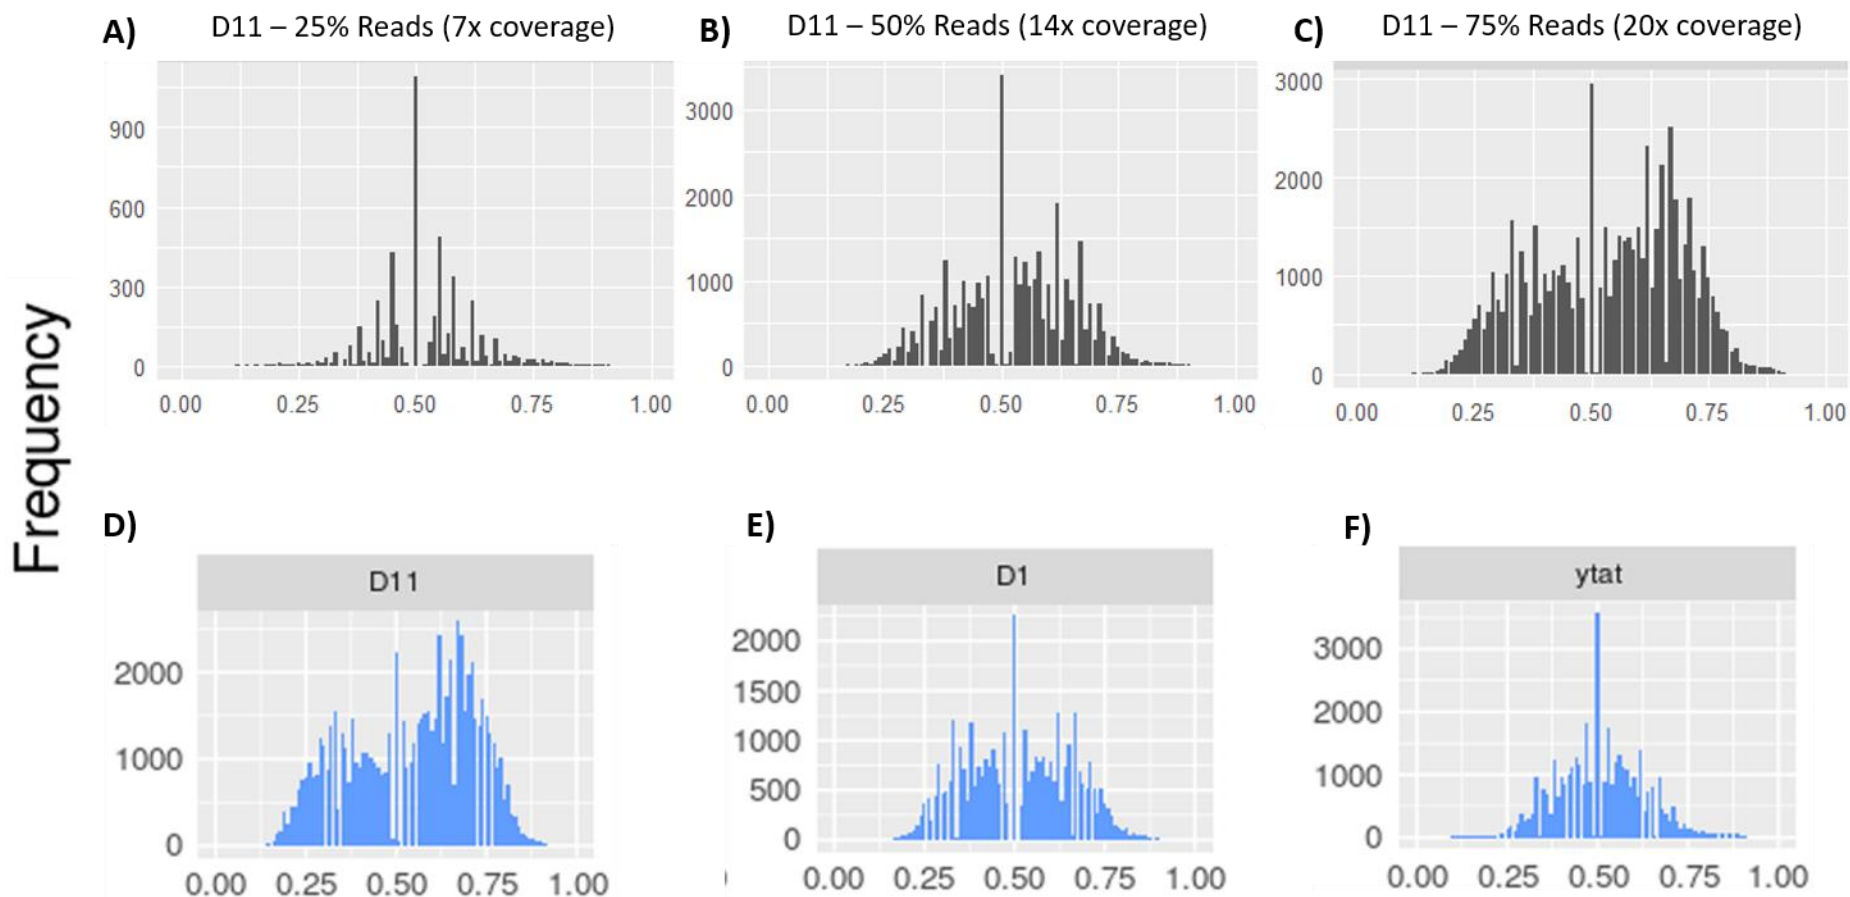

**Supplementary Figure 3:** Chromosomal somy estimated based on allele frequency. For each chromosome, the proportion of the alleles in each predicted heterozygous site was obtained and rounded to the second place. Base frequencies were rounded in 100 categories, ranging from 0.01 to 1.00, and an approximate distribution of base frequencies for each chromosome was plotted in R. Diploid chromosomes had a peak in 0.50 **(A)**, while triploid chromosomes had peaks in 0.33 and 0.66 **(B)**. Tetraploid chromosomes had combination of peaks of 0.25, 0.75 and 0.50 **(C)**. Each slide correspond to somy predictions of the eleven *T. brucei* chromosomes, based on each of the read libraries described in table 1. The *T. brucei* subspecies and isolate/strain name is described in the top of each slide.

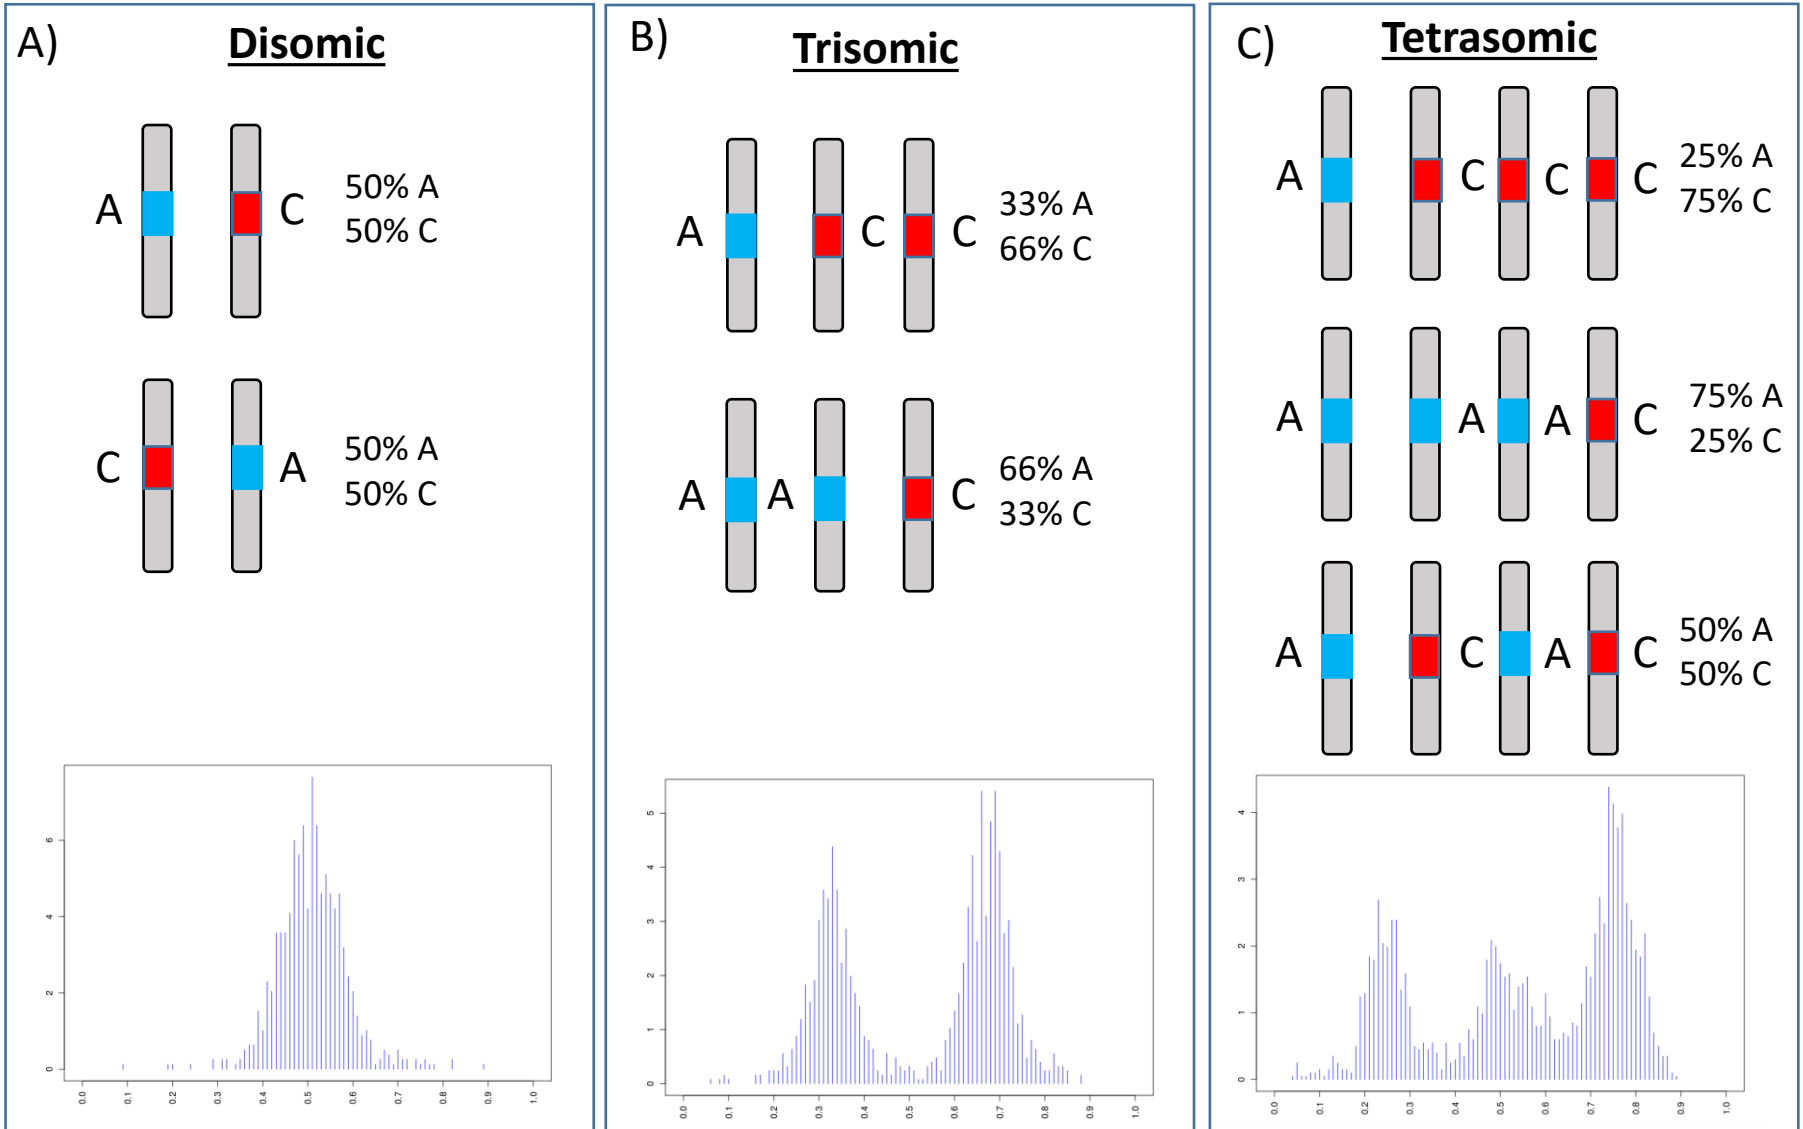

# *T. b. rhodesiense* - Isolate D3

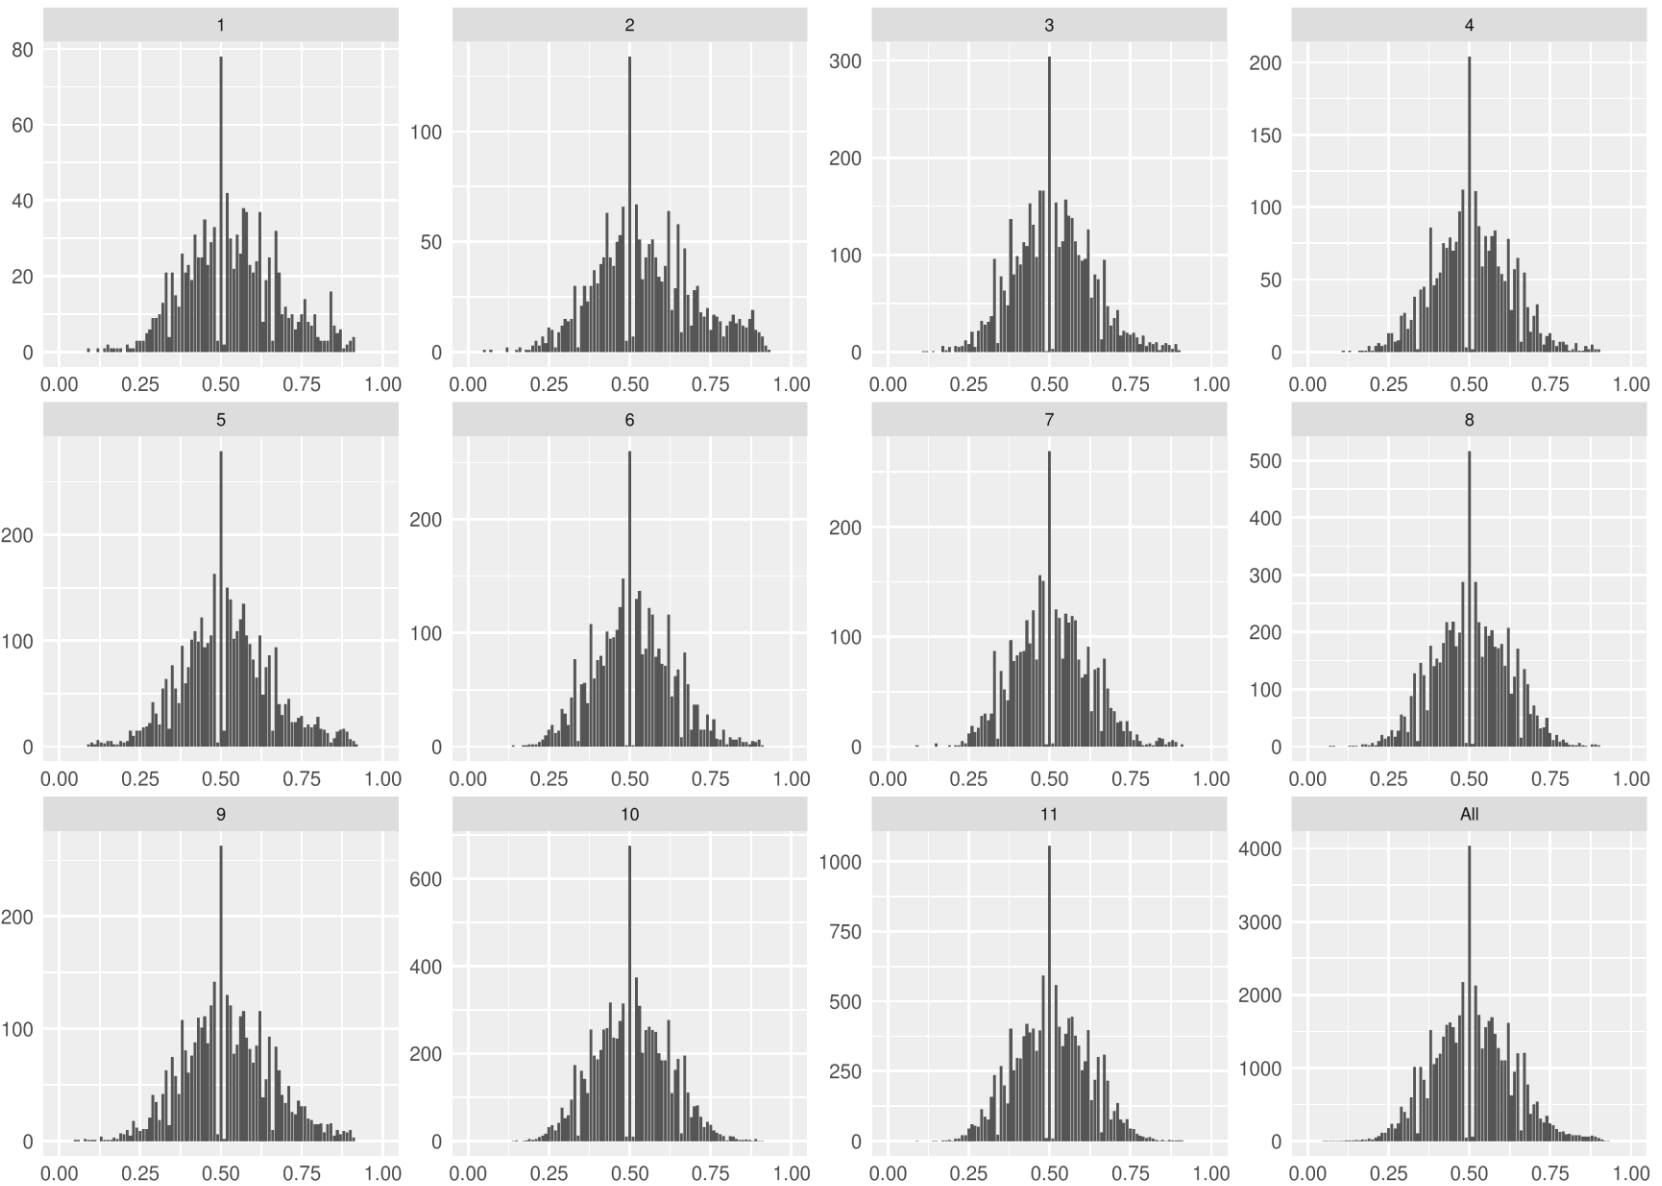



# *T. b. rhodesiense* - Isolate D4

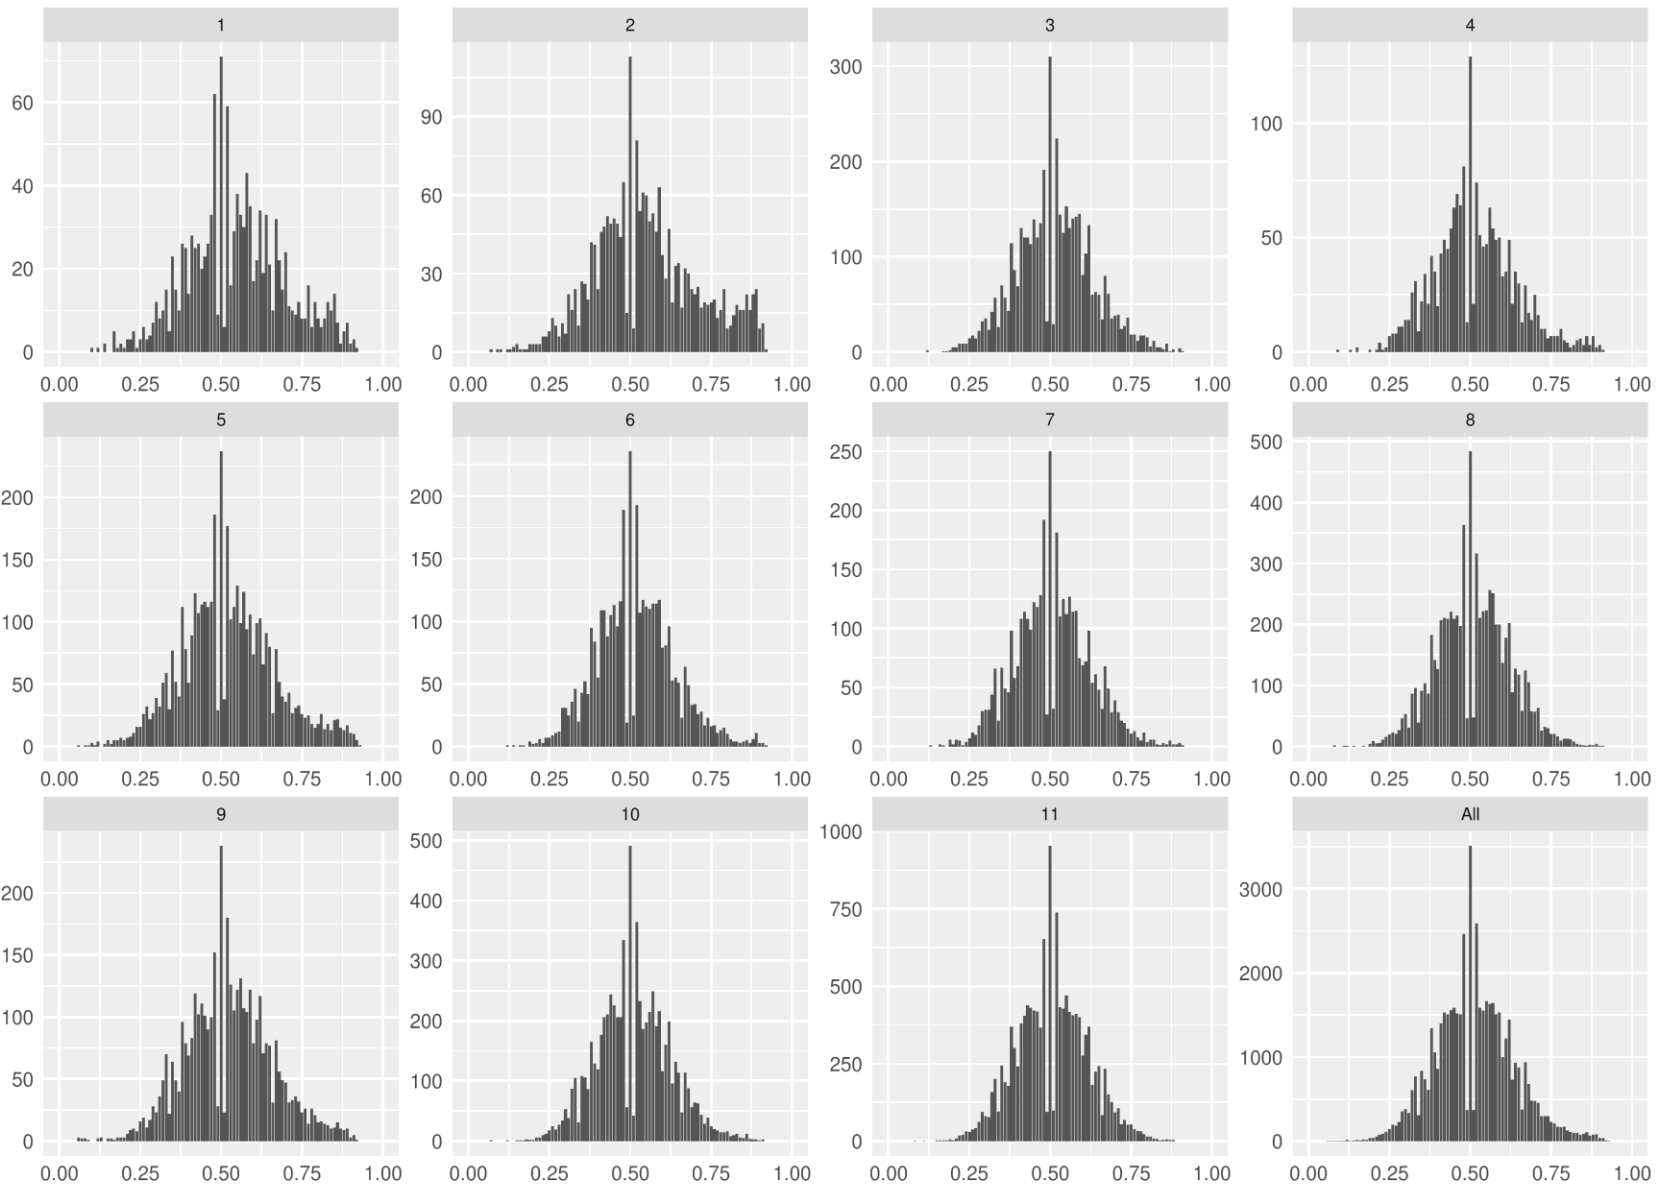

# *T. b. rhodesiense* - Isolate Apendum

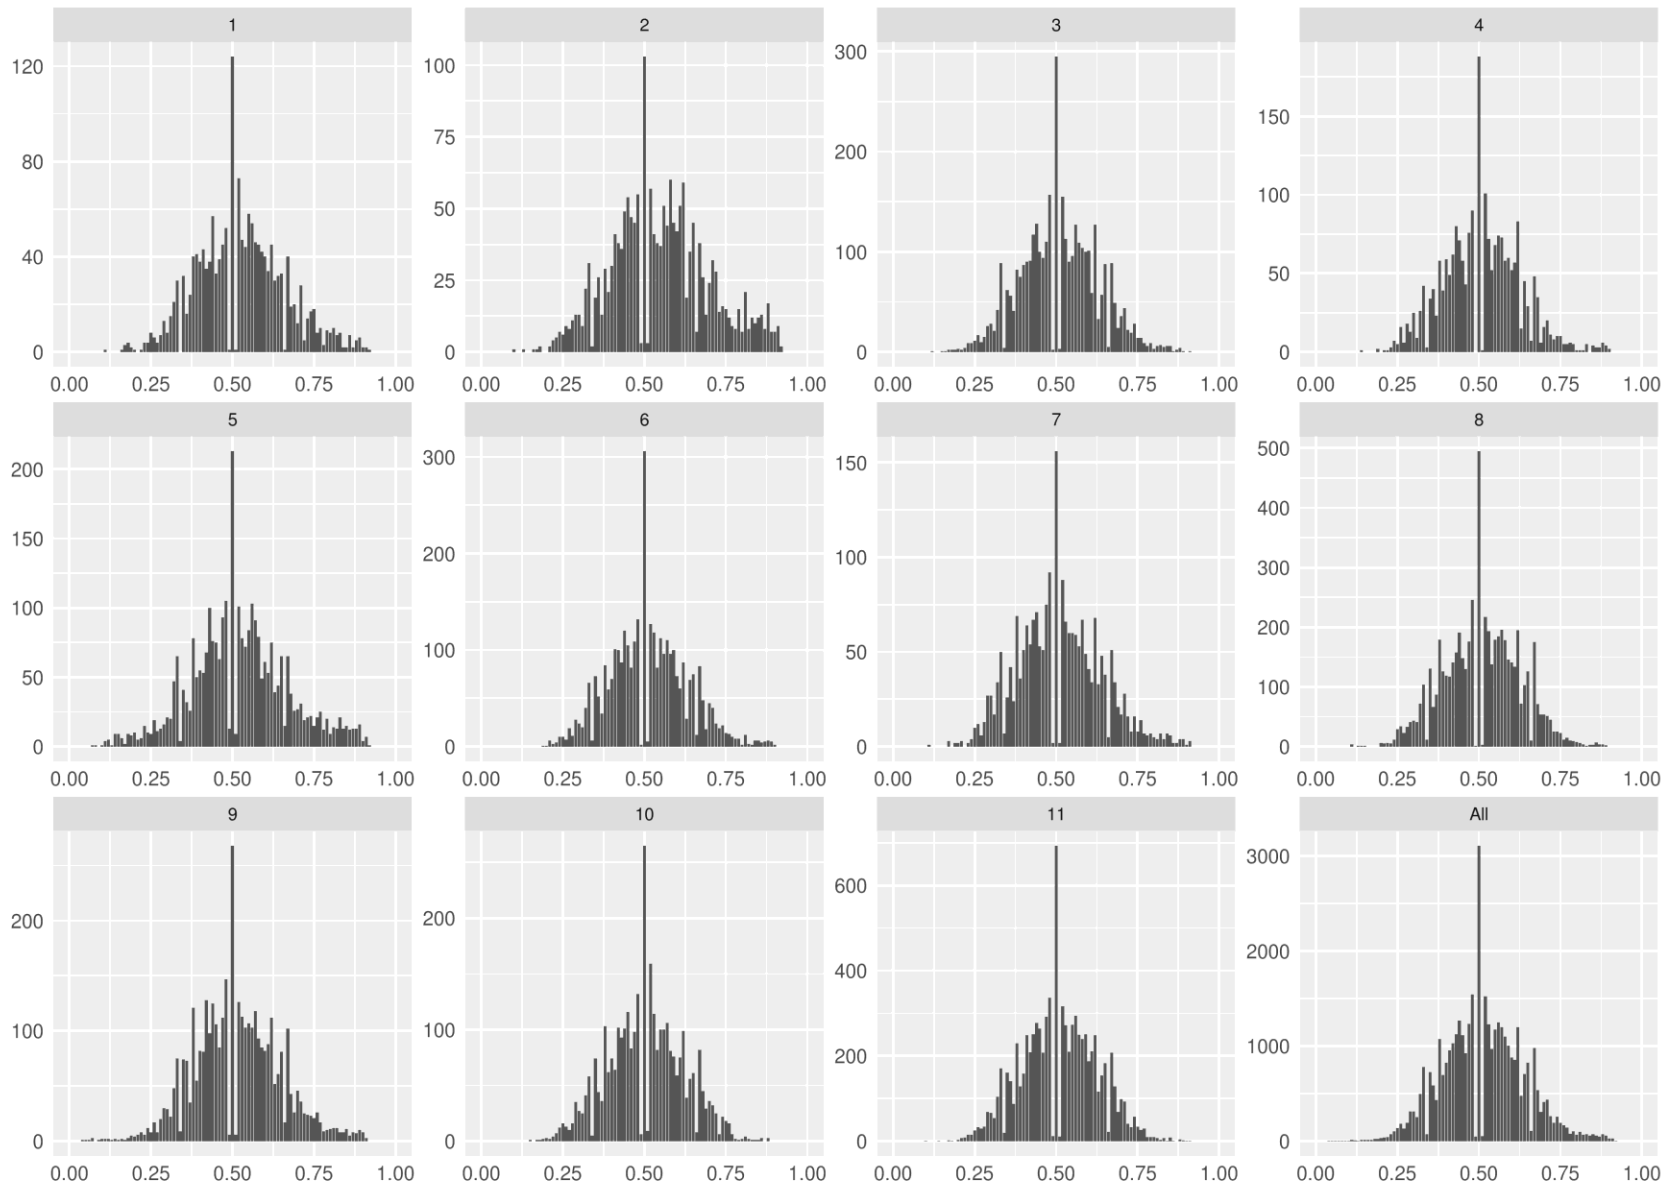

# *T. b. rhodesiense* - Isolate D16

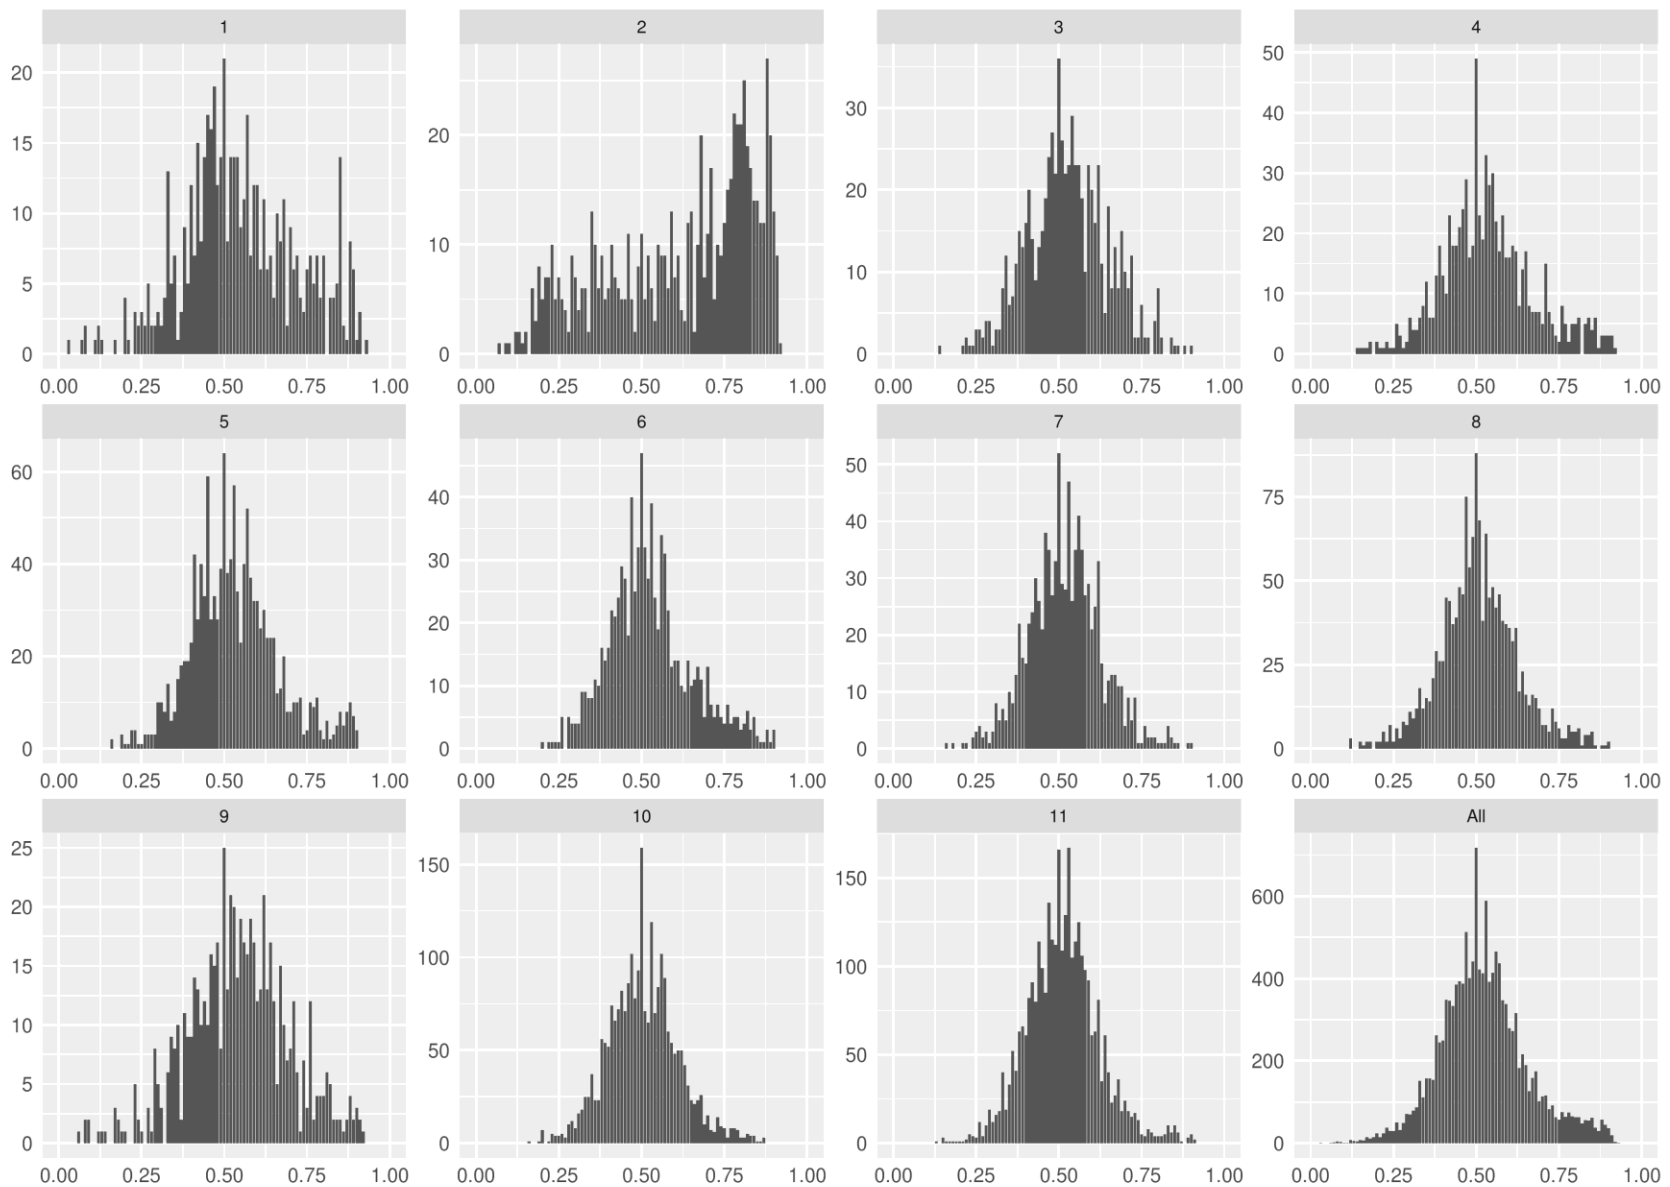

# *T. b. rhodesiense* - Isolate D2

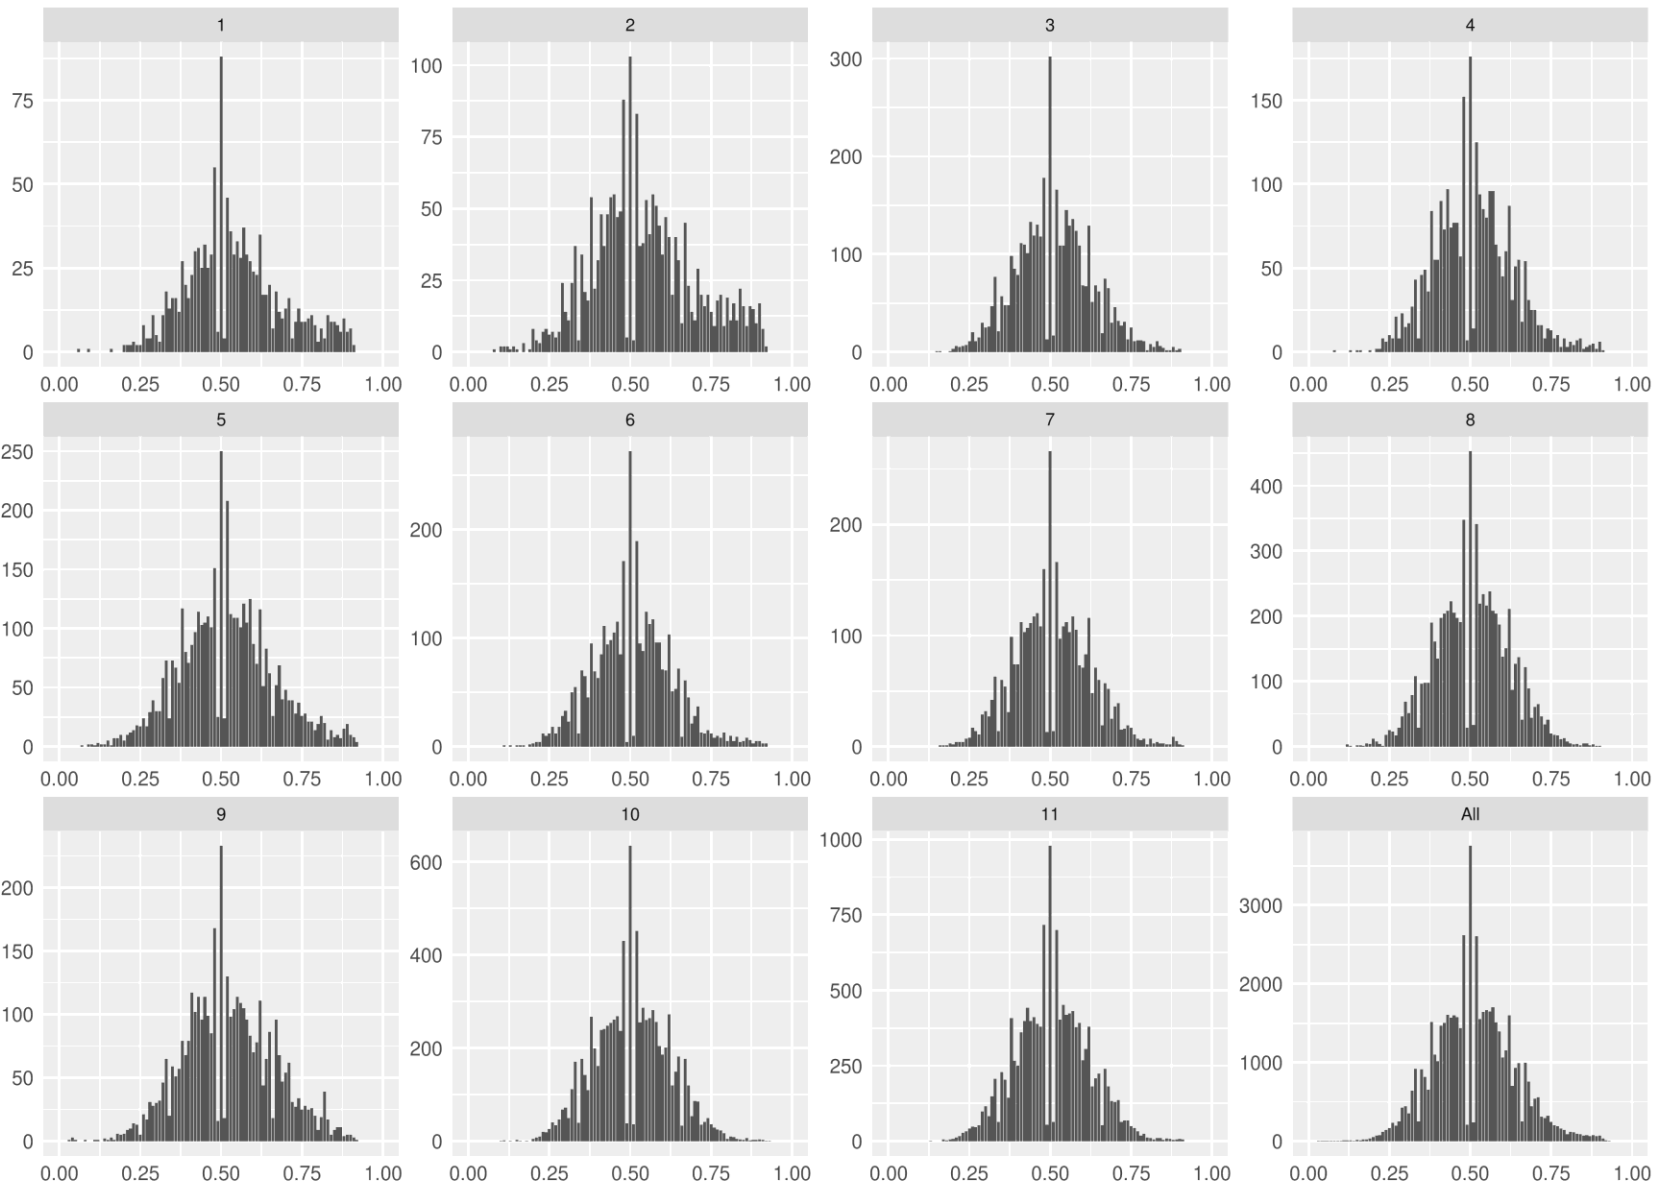

# *T. b. rhodesiense* - Isolate D1

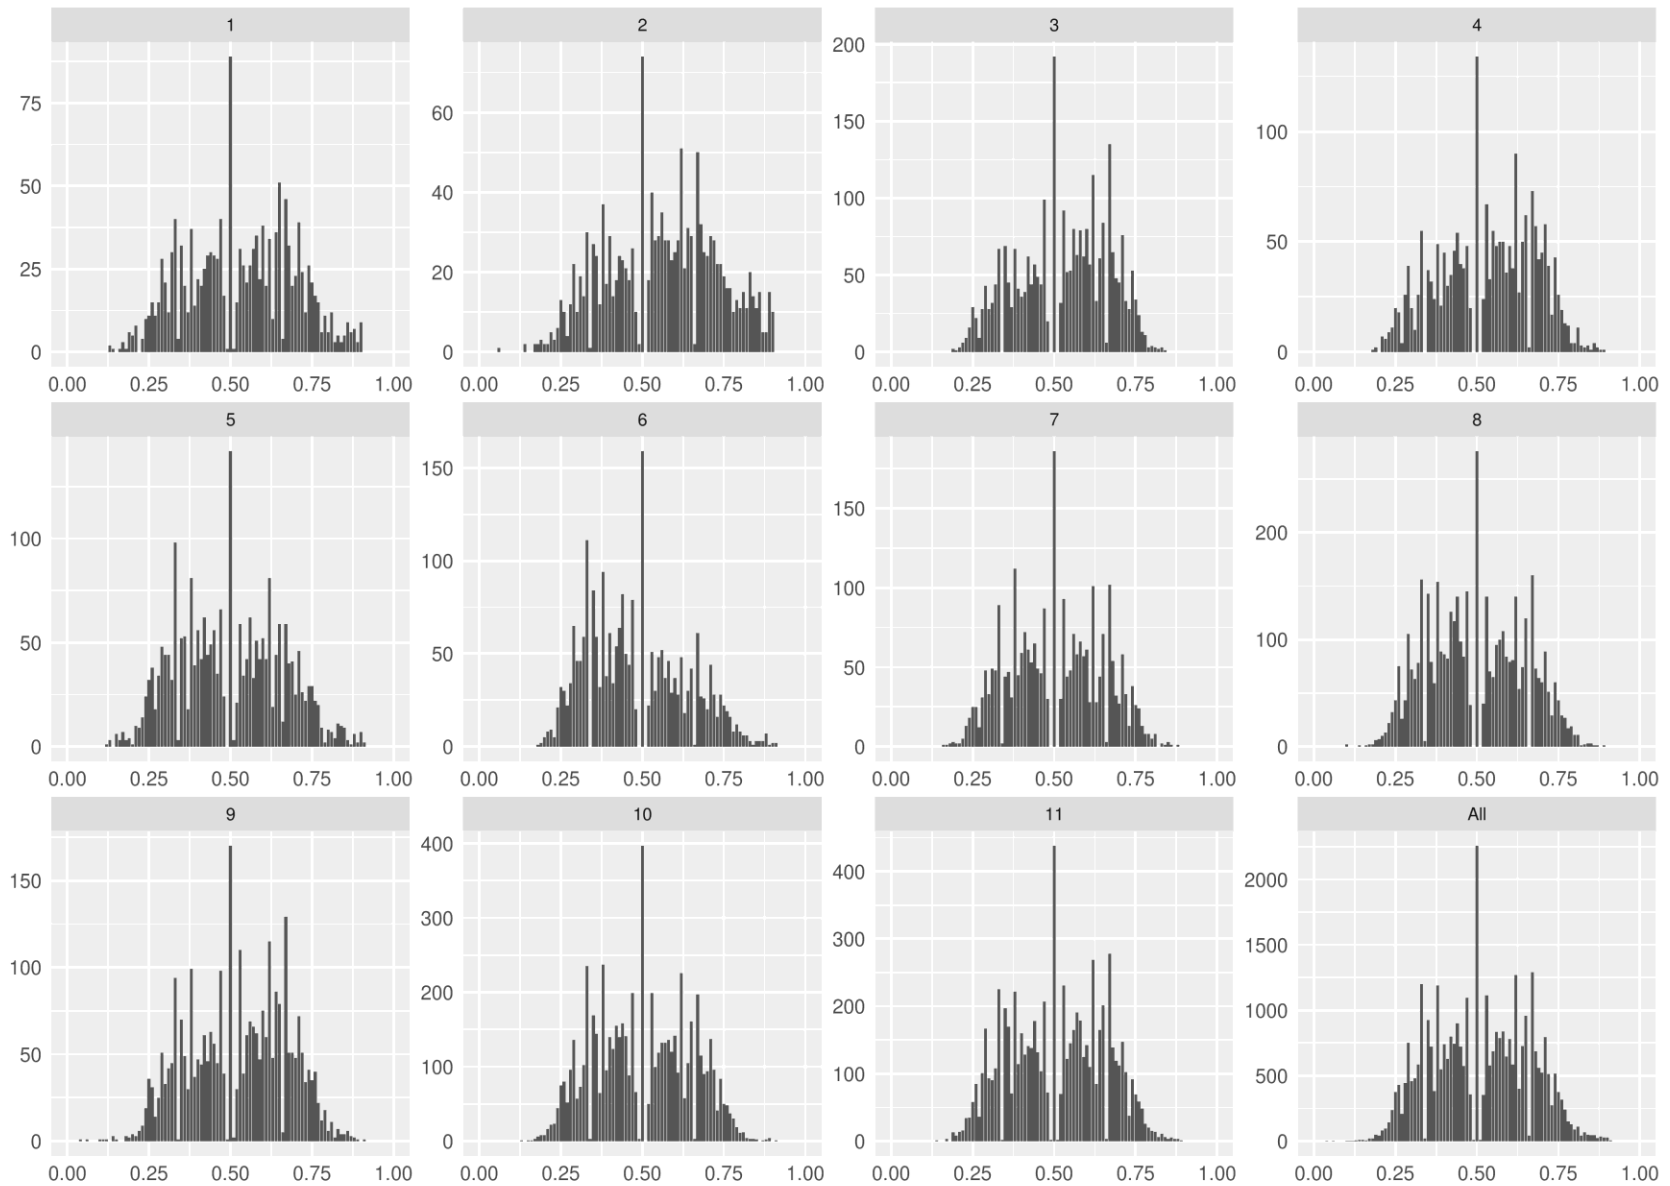

# *T. b. rhodesiense* - Isolate D11

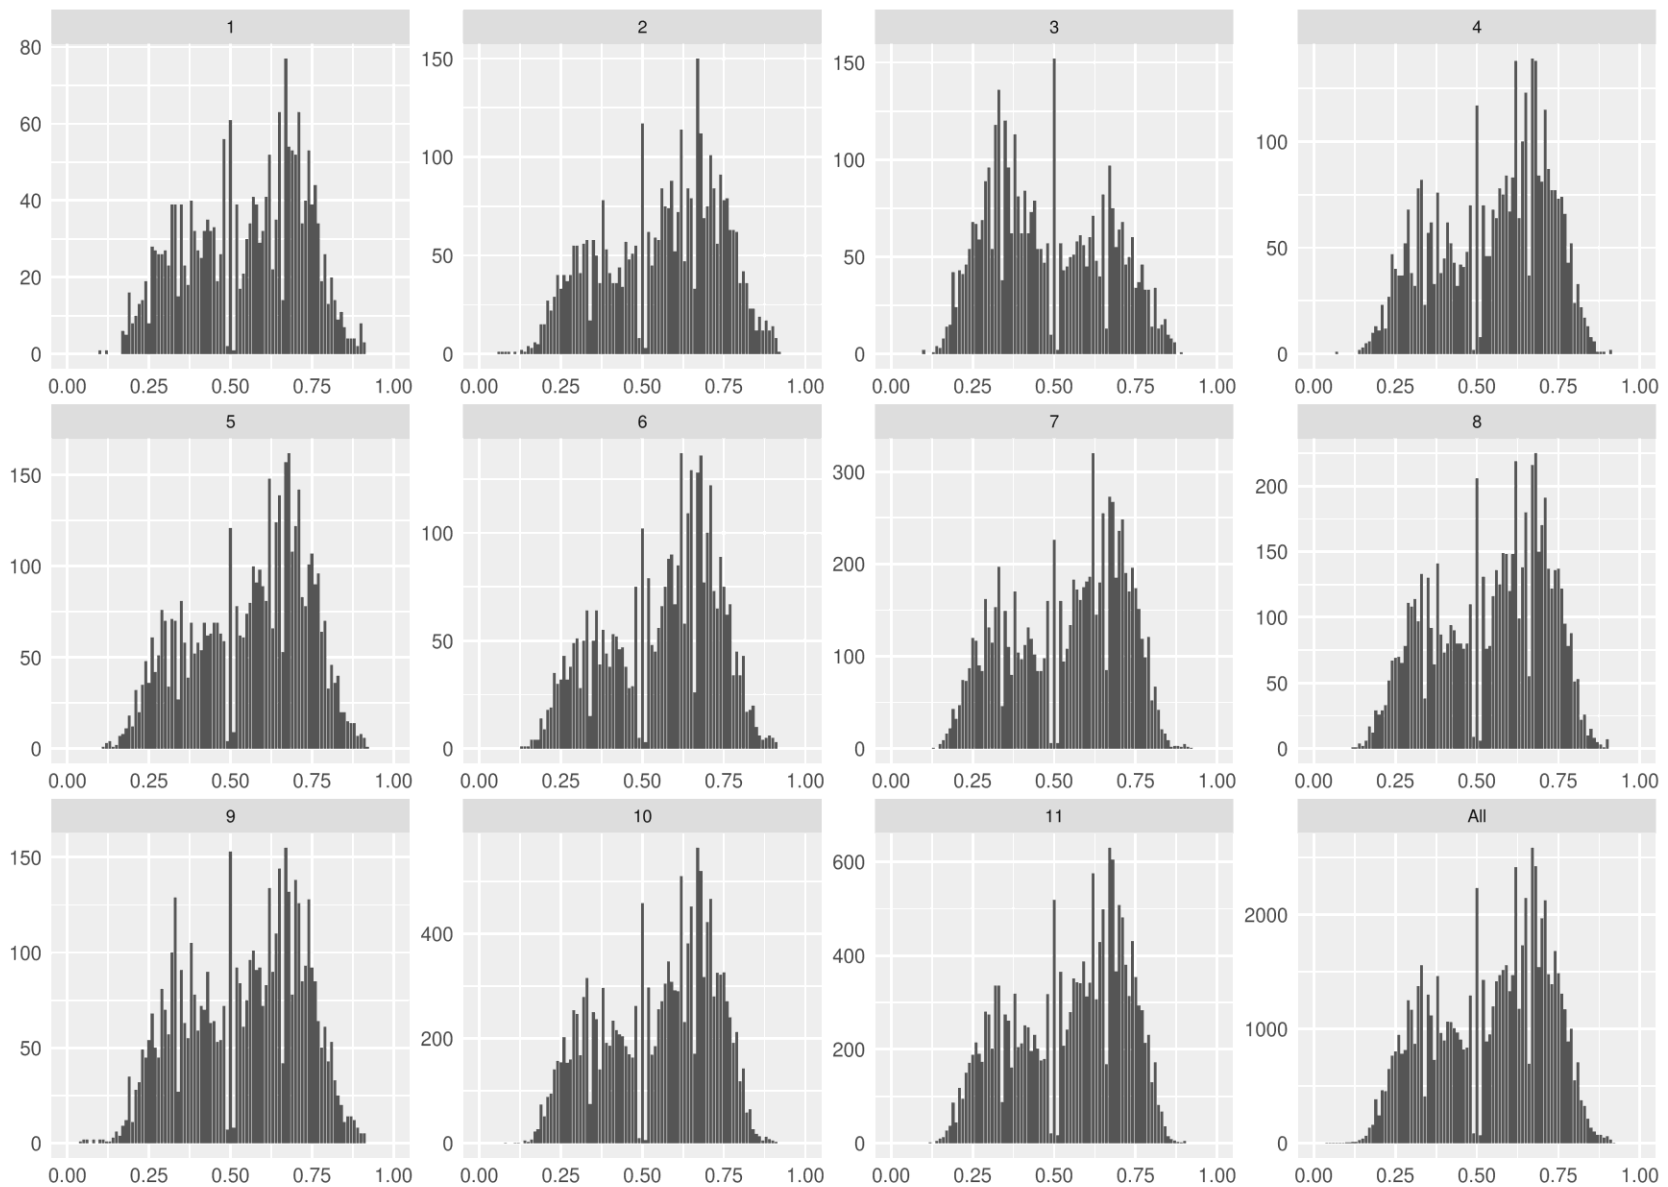

# *T. b. rhodesiense* - Isolate STIB900

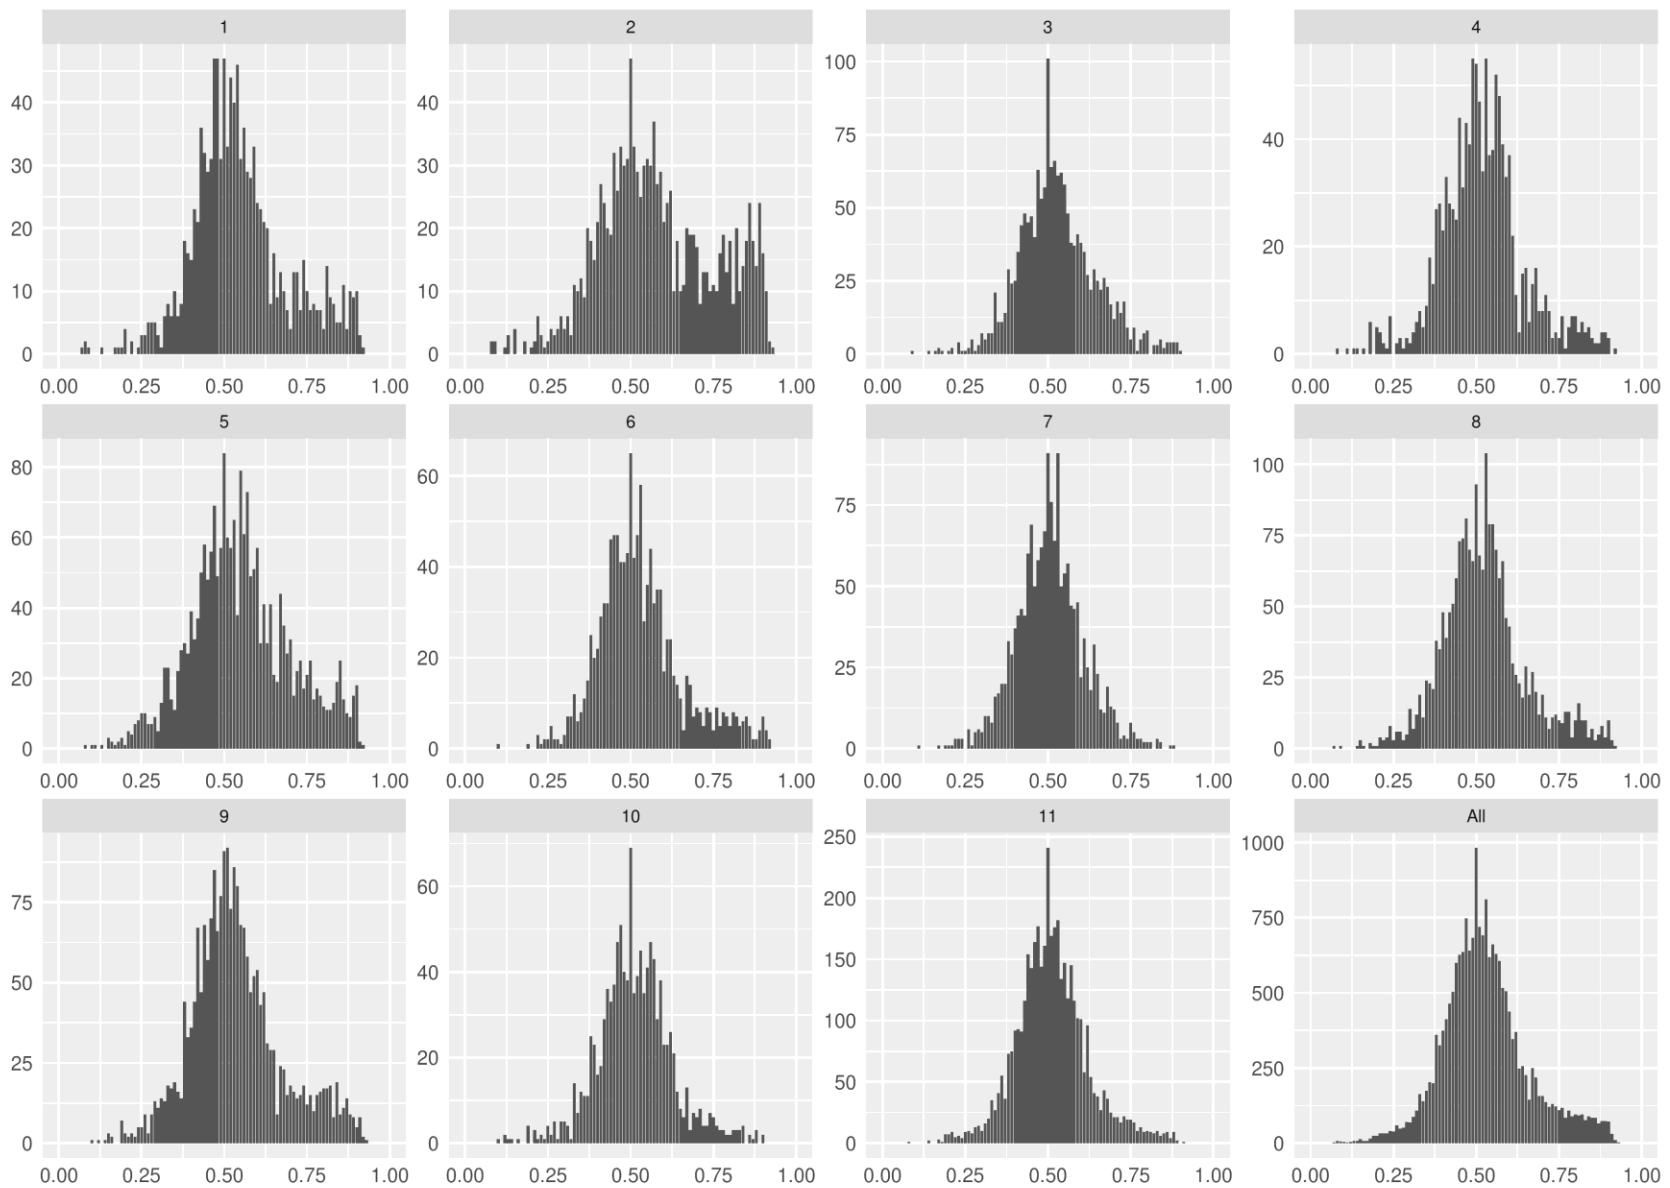

# *T. b. rhodesiense* - Isolate STIB704C

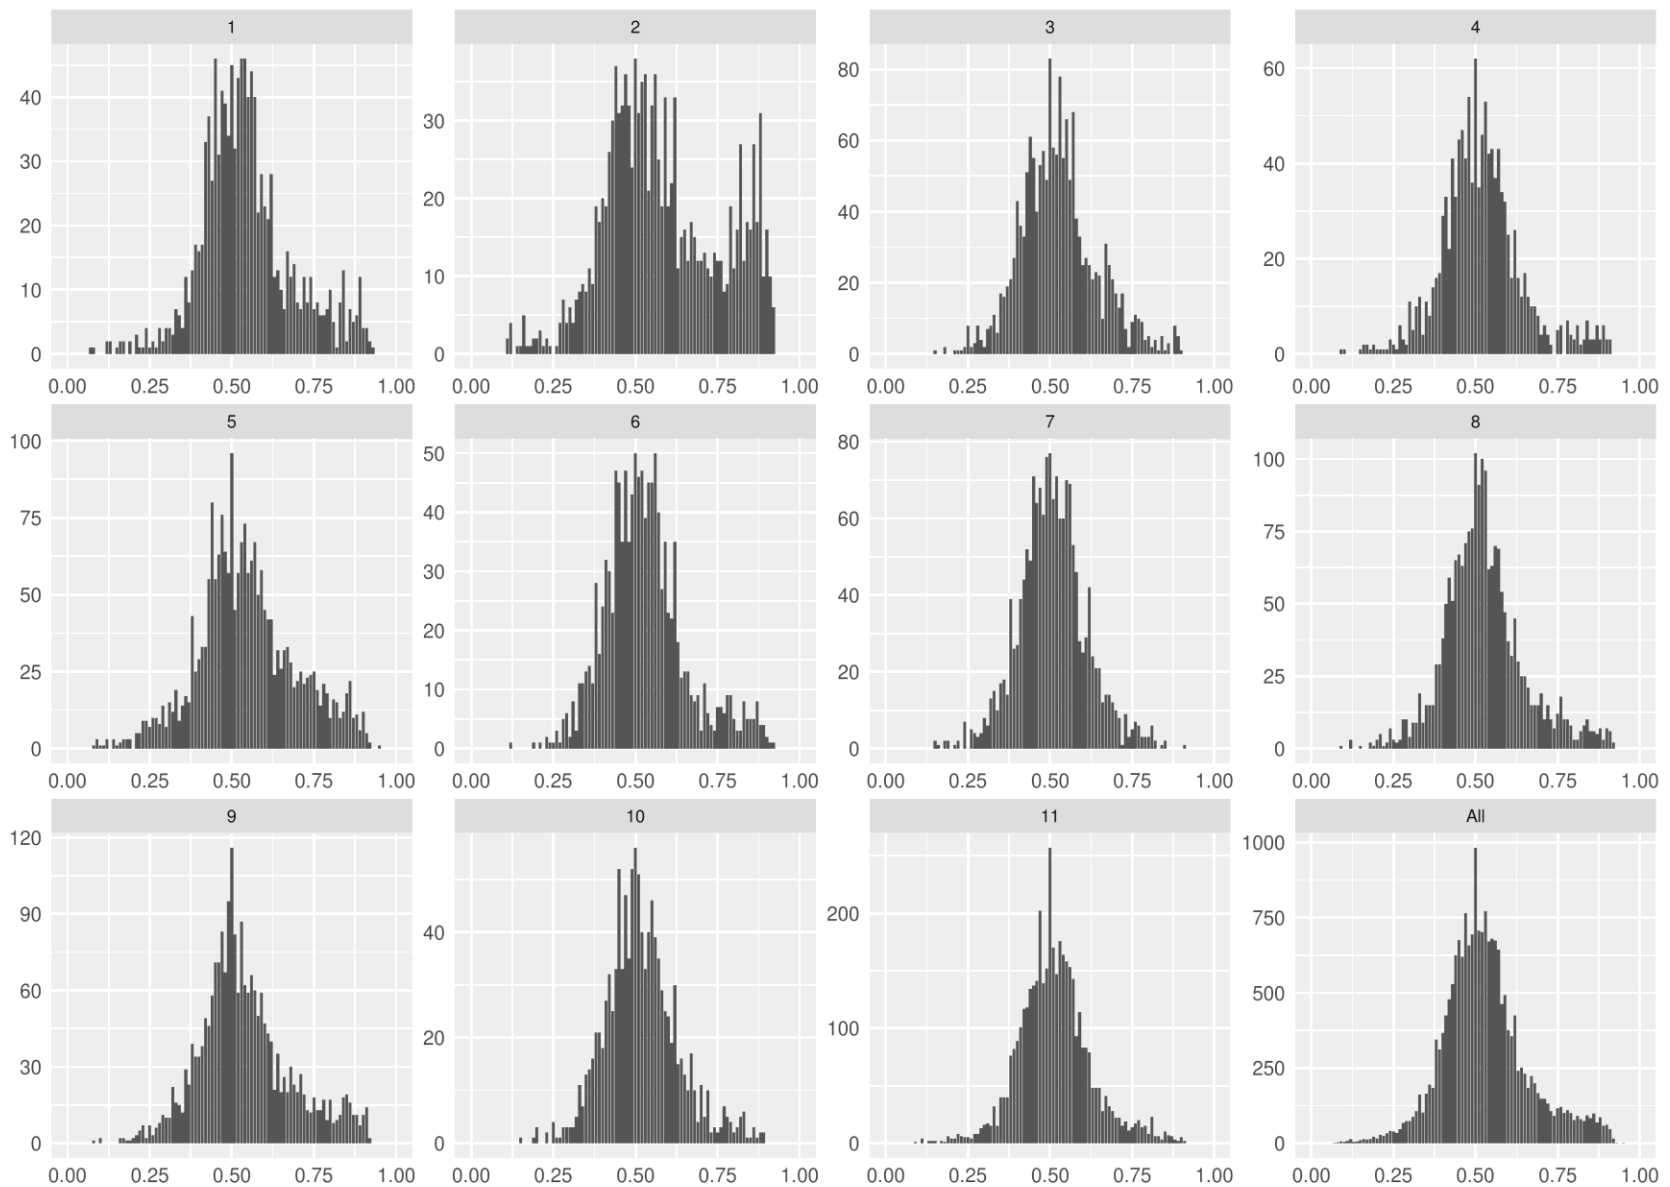



# *T. b. rhodesiense* - Isolate ytat

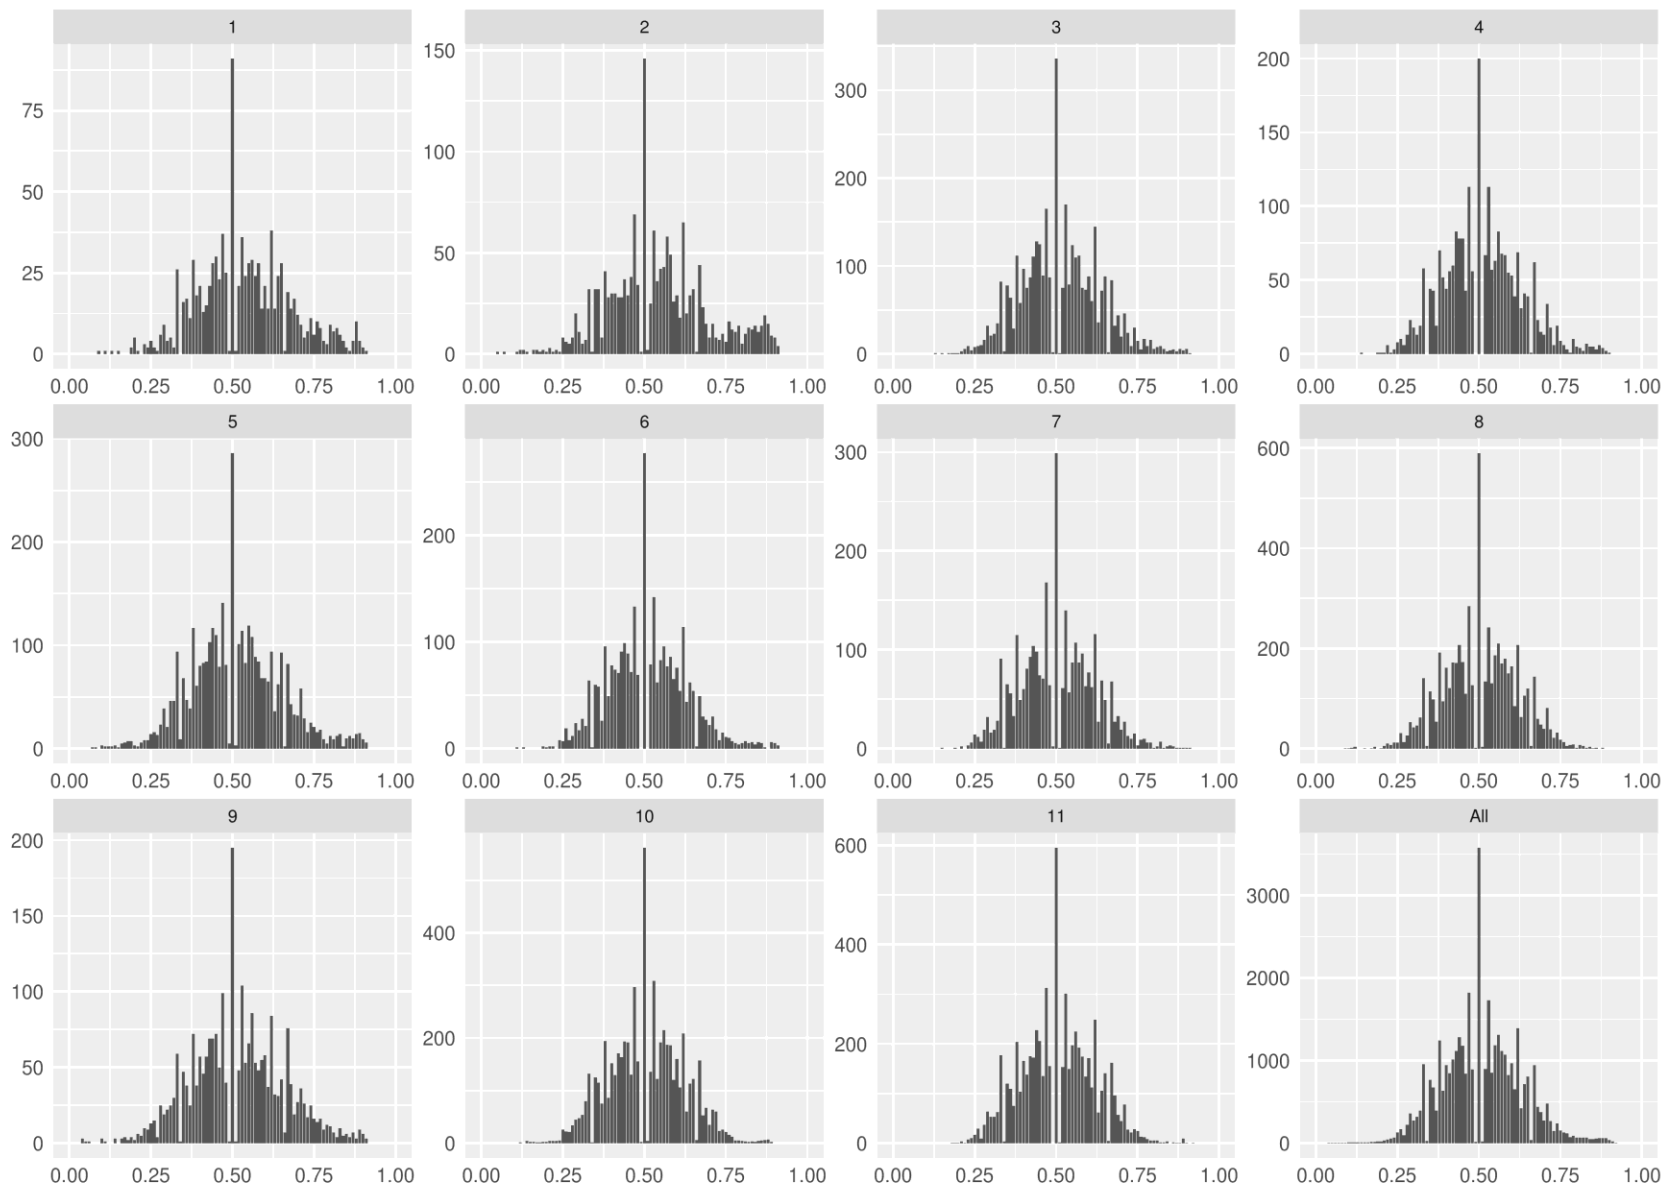

# *T. b. rhodesiense* - Isolate LWO30A

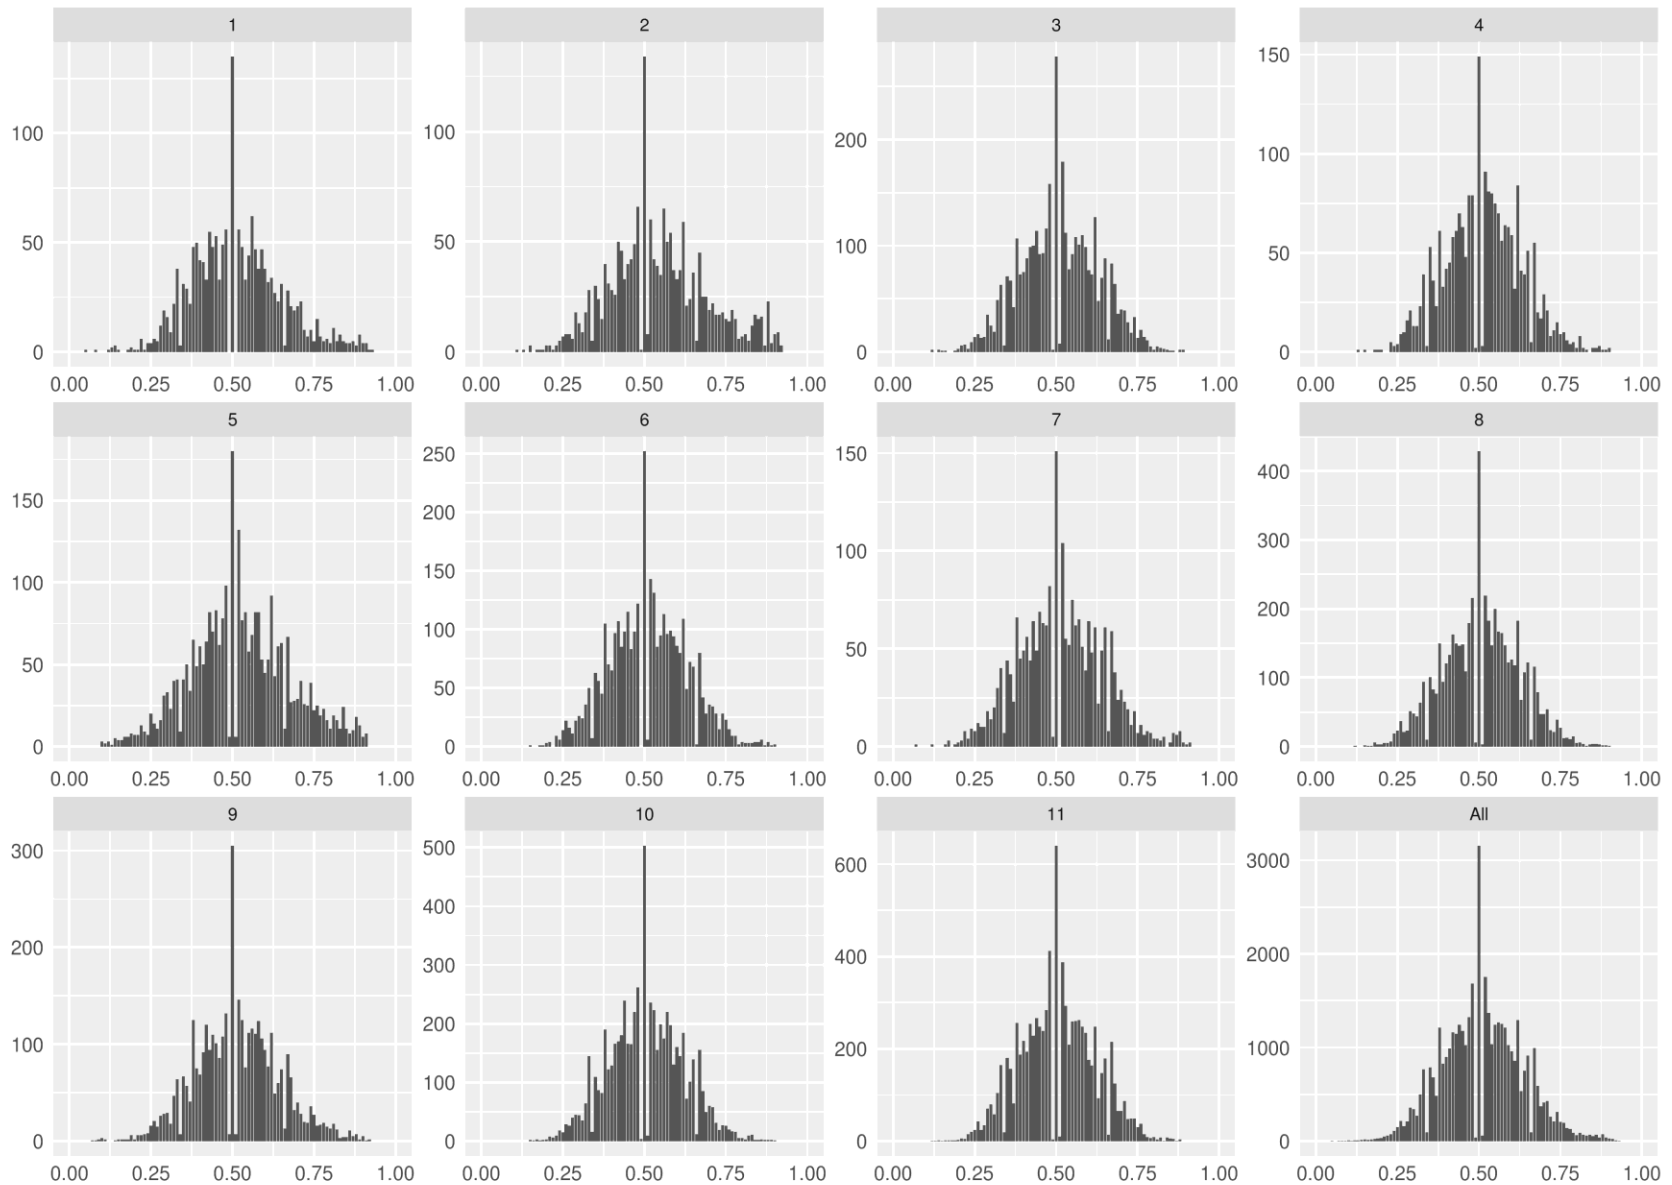

# *T. b. rhodesiense* - Isolate Okware

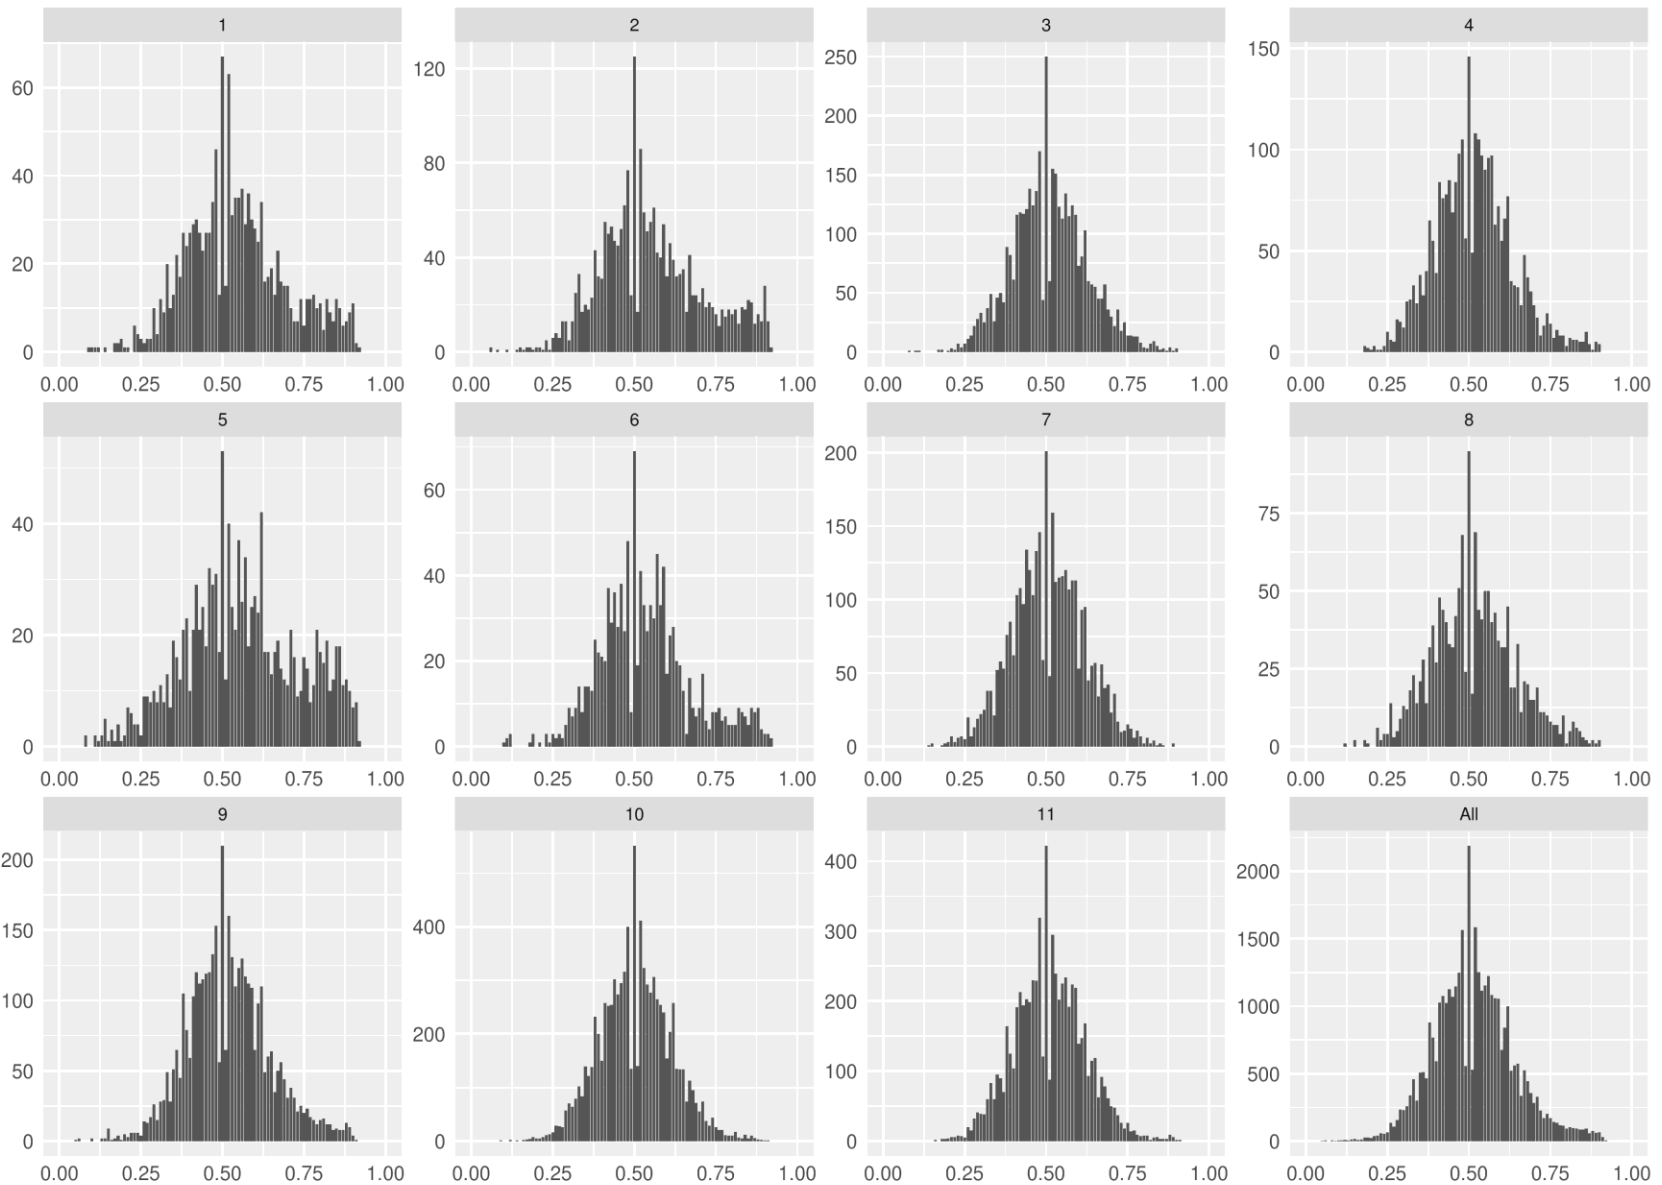

# *T. b. rhodesiense* - Isolate Dog157

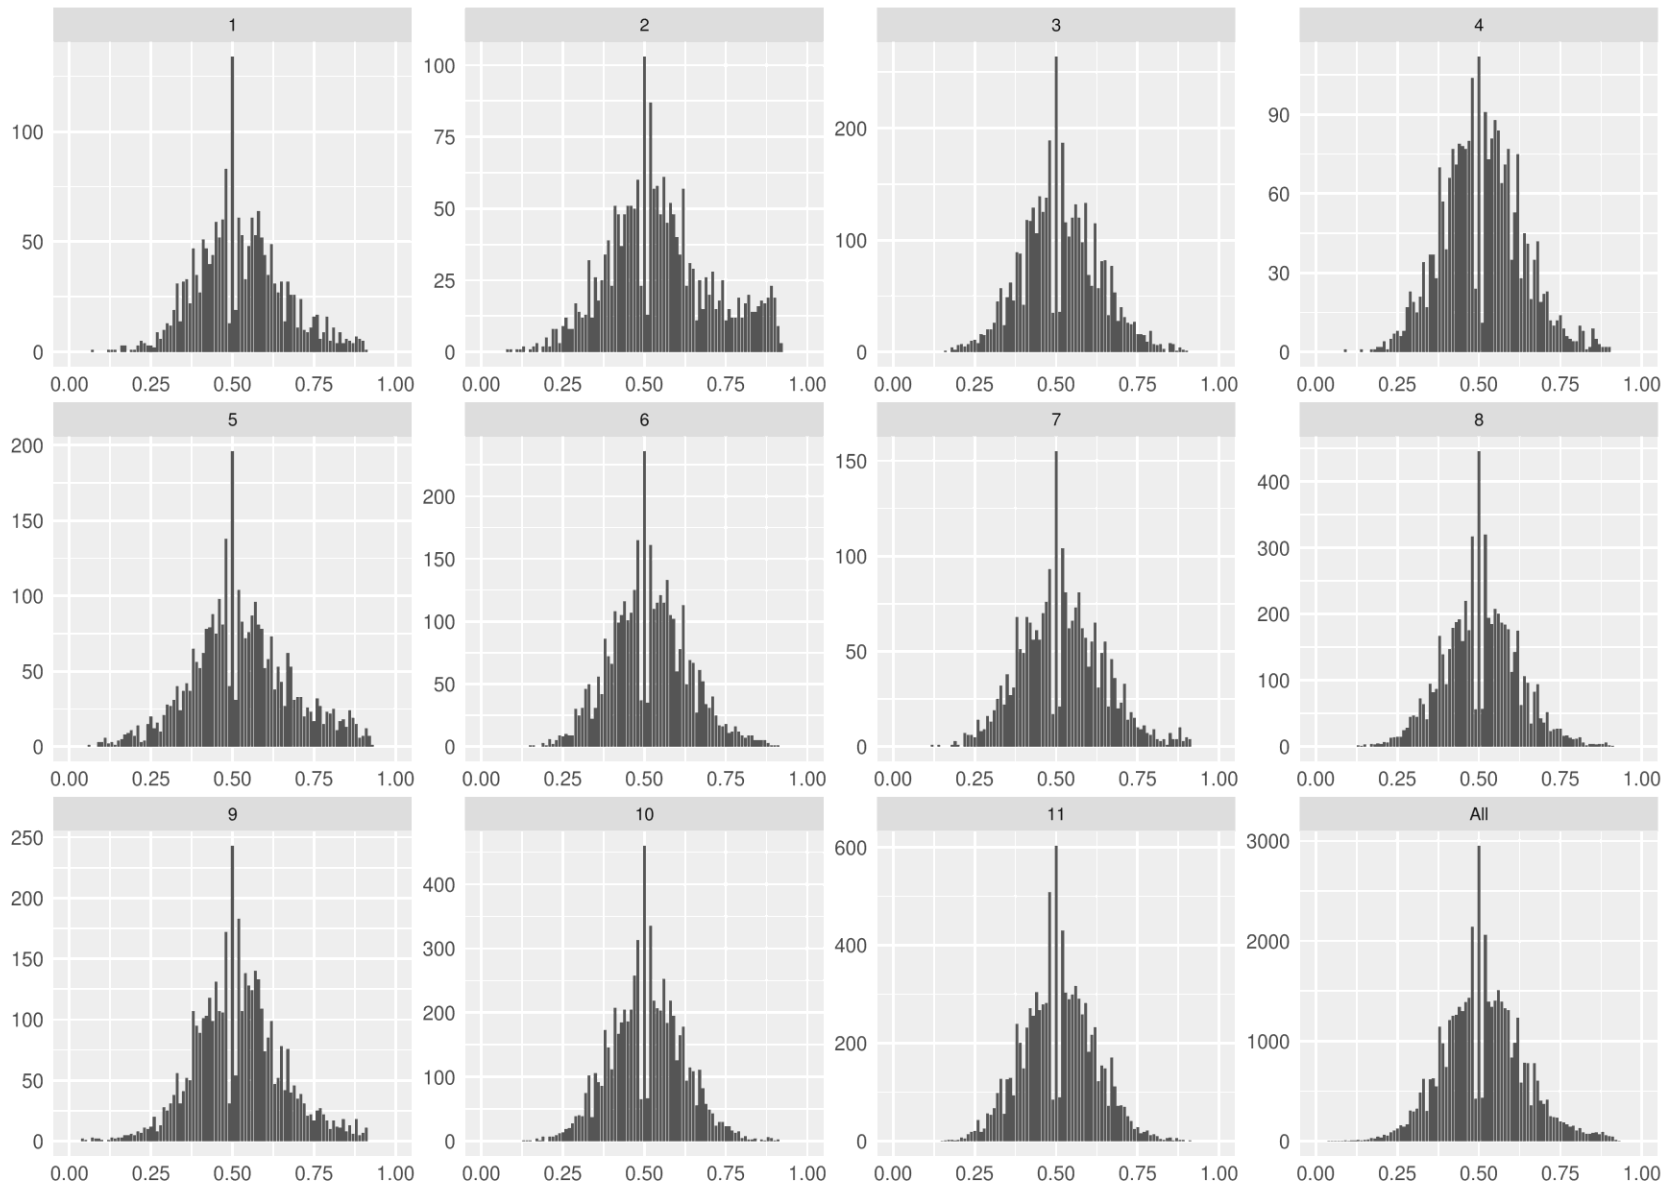

# *T. b. rhodesiense* - Isolate Keko

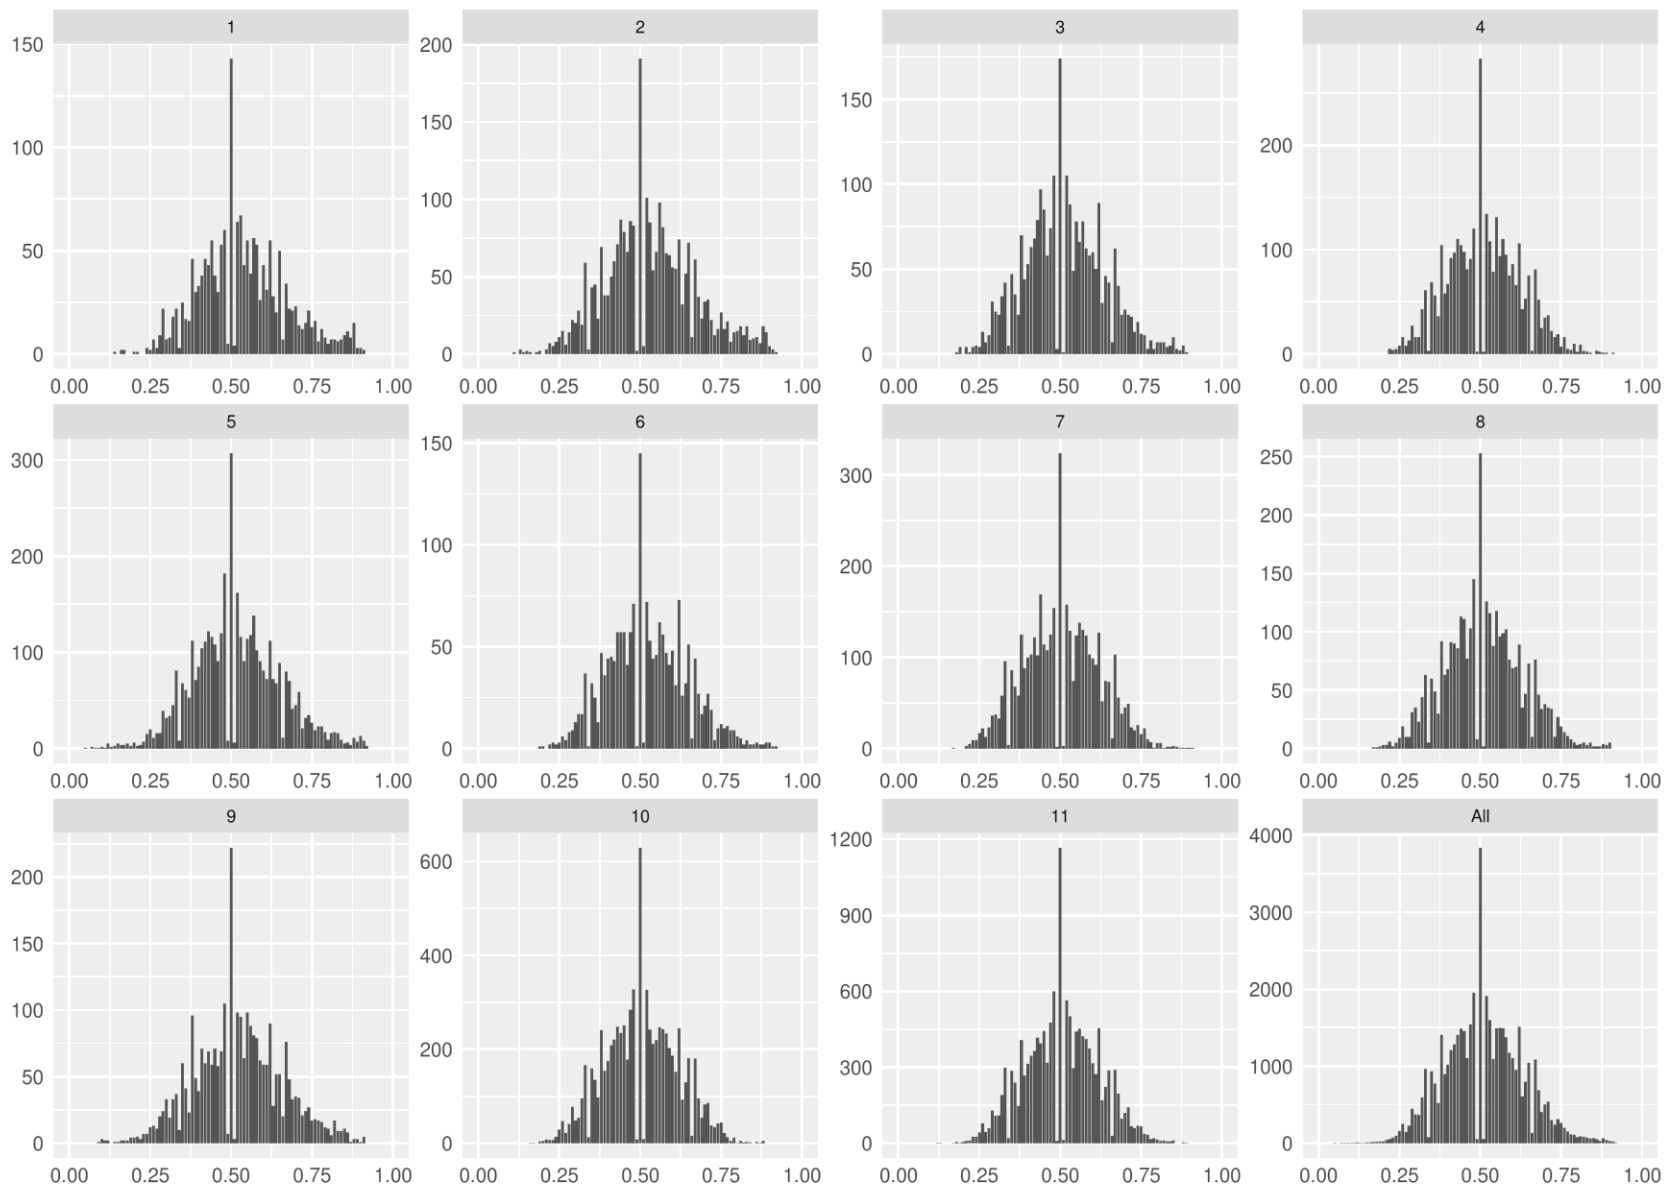

# *T. b. rhodesiense* - Isolate D5

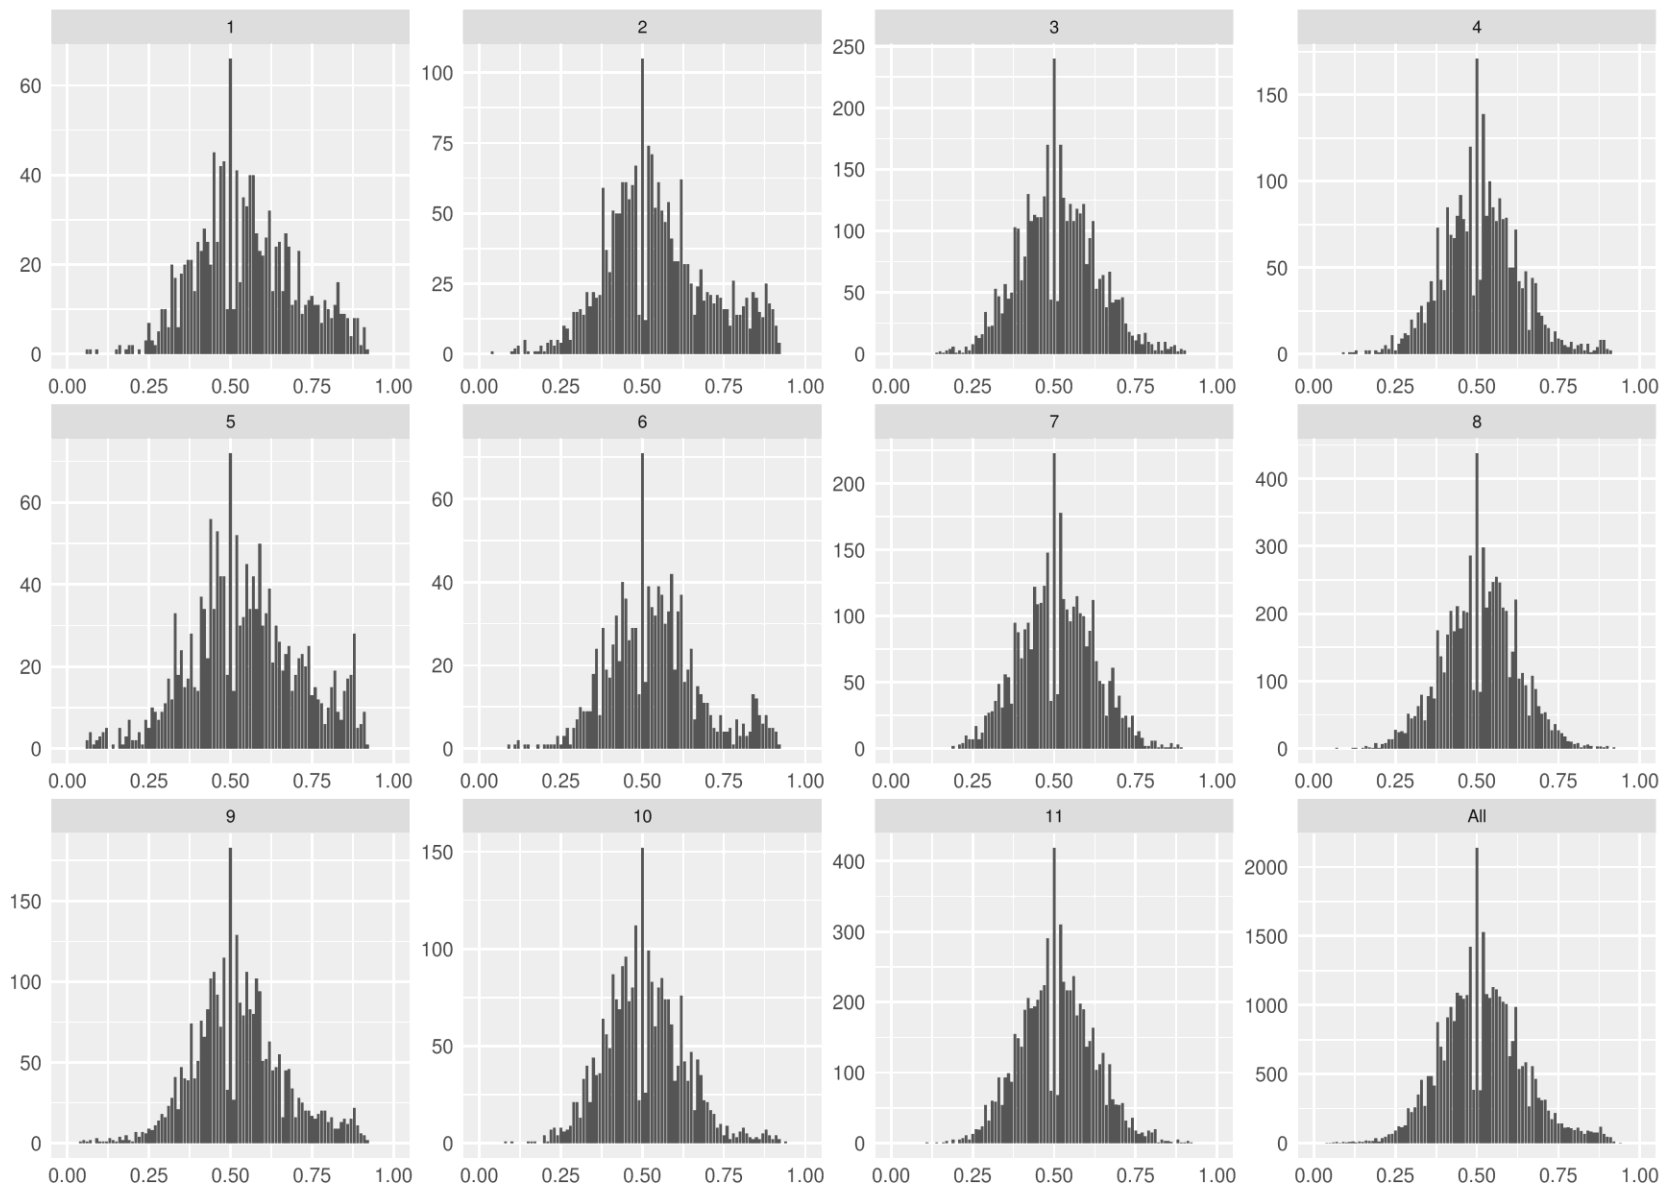

# *T. b. rhodesiense* - Isolate D7

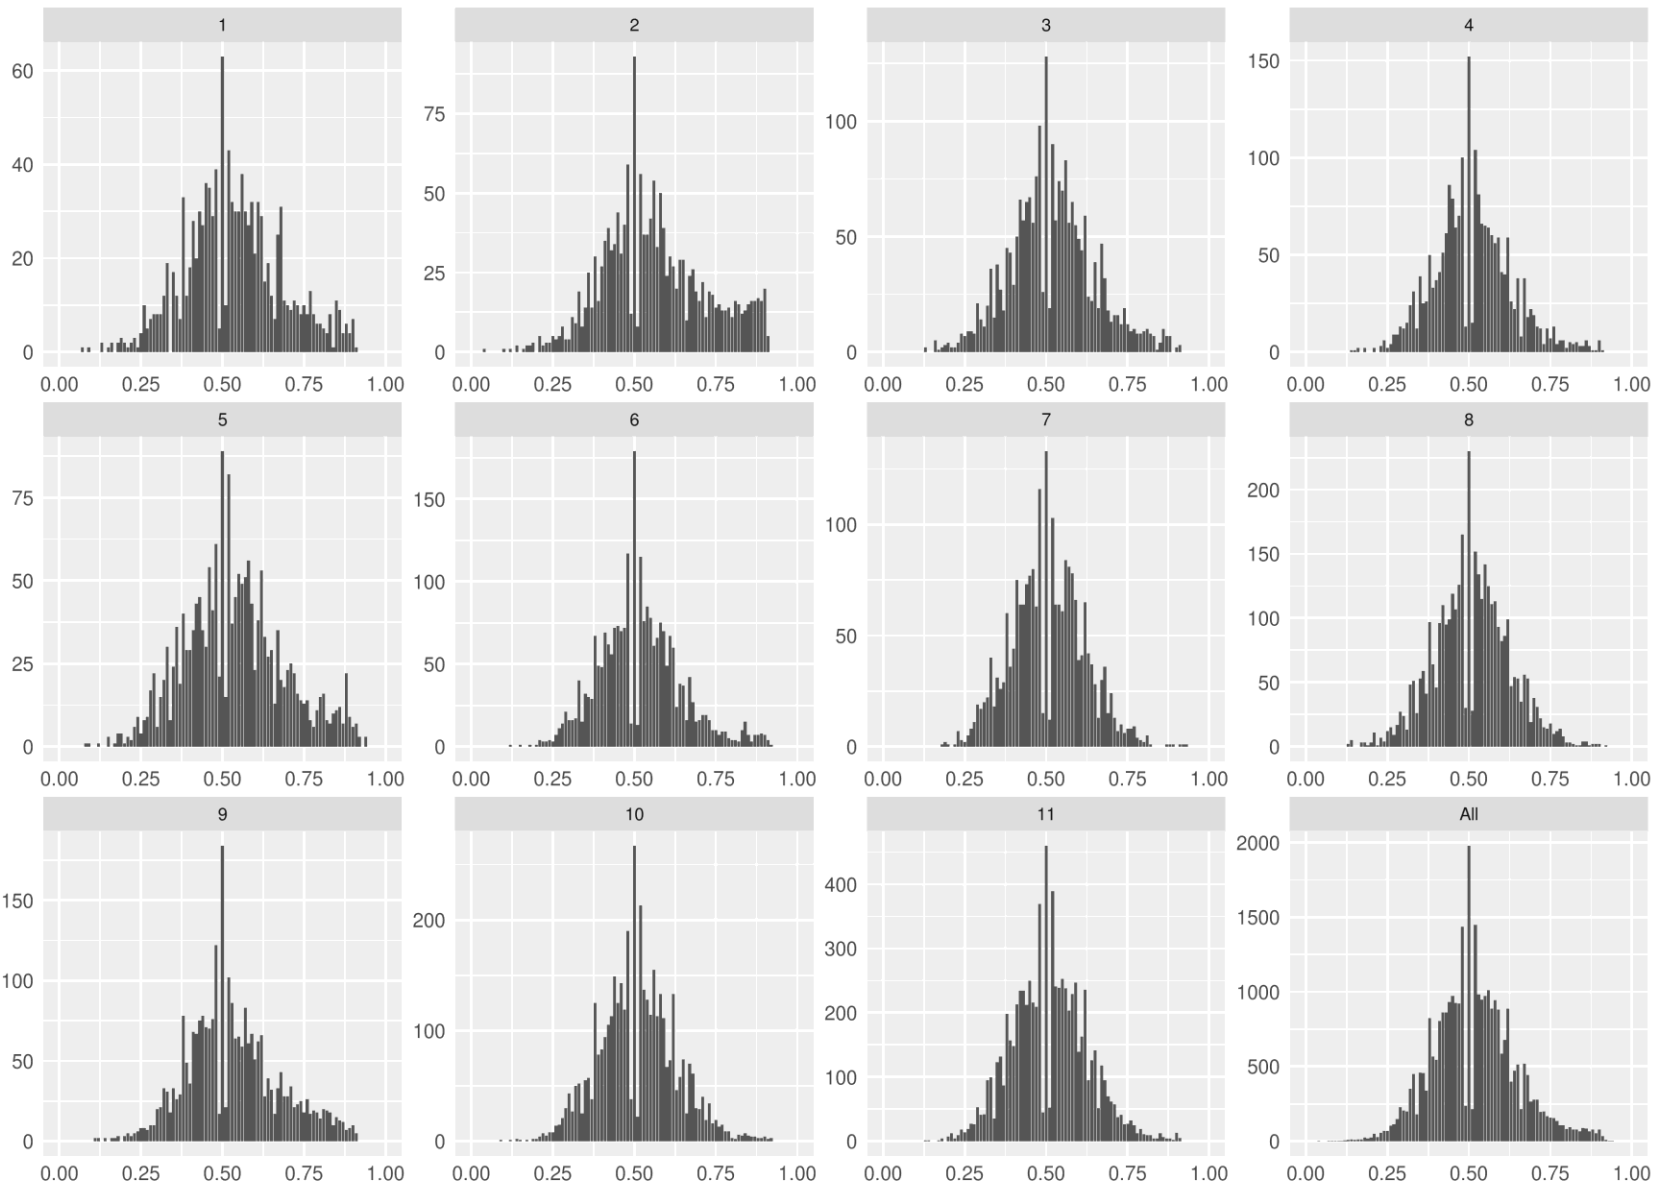

# *T. b. rhodesiense* - Isolate LWO150A

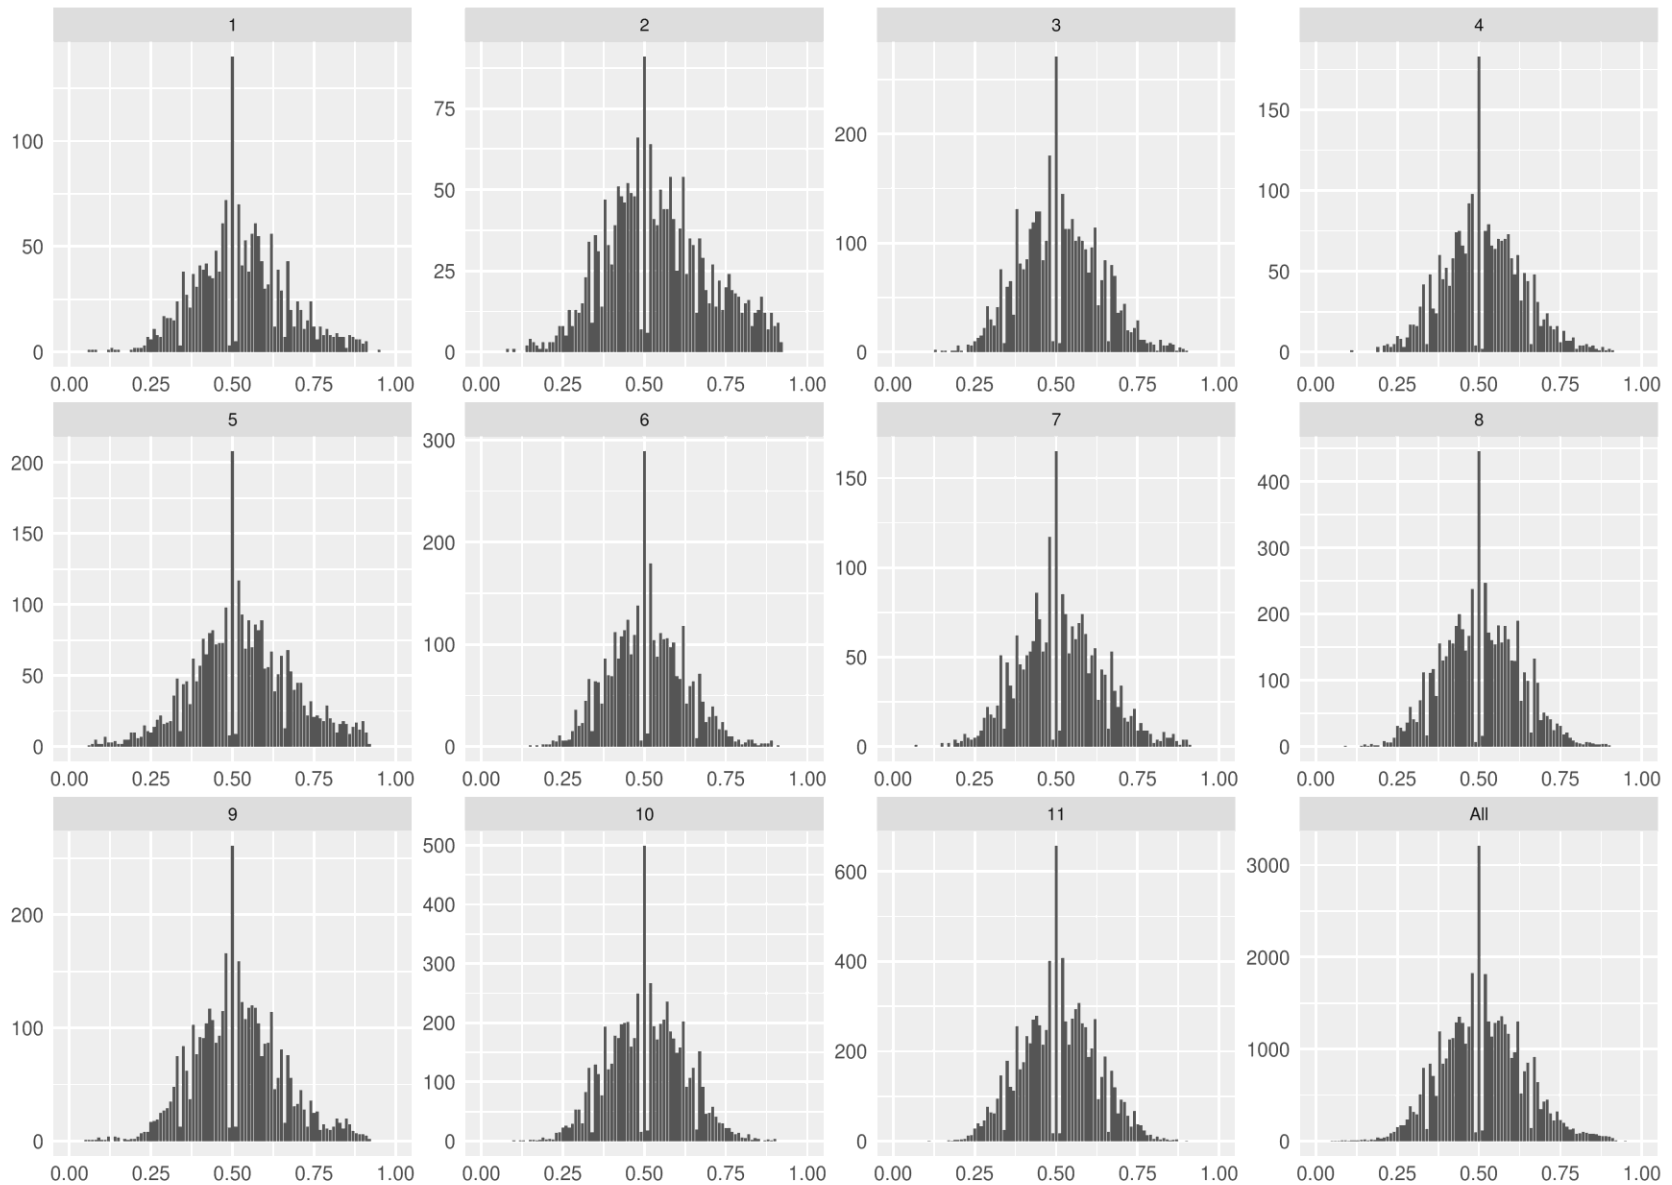



# *T. b. rhodesiense* - Isolate LWO24A

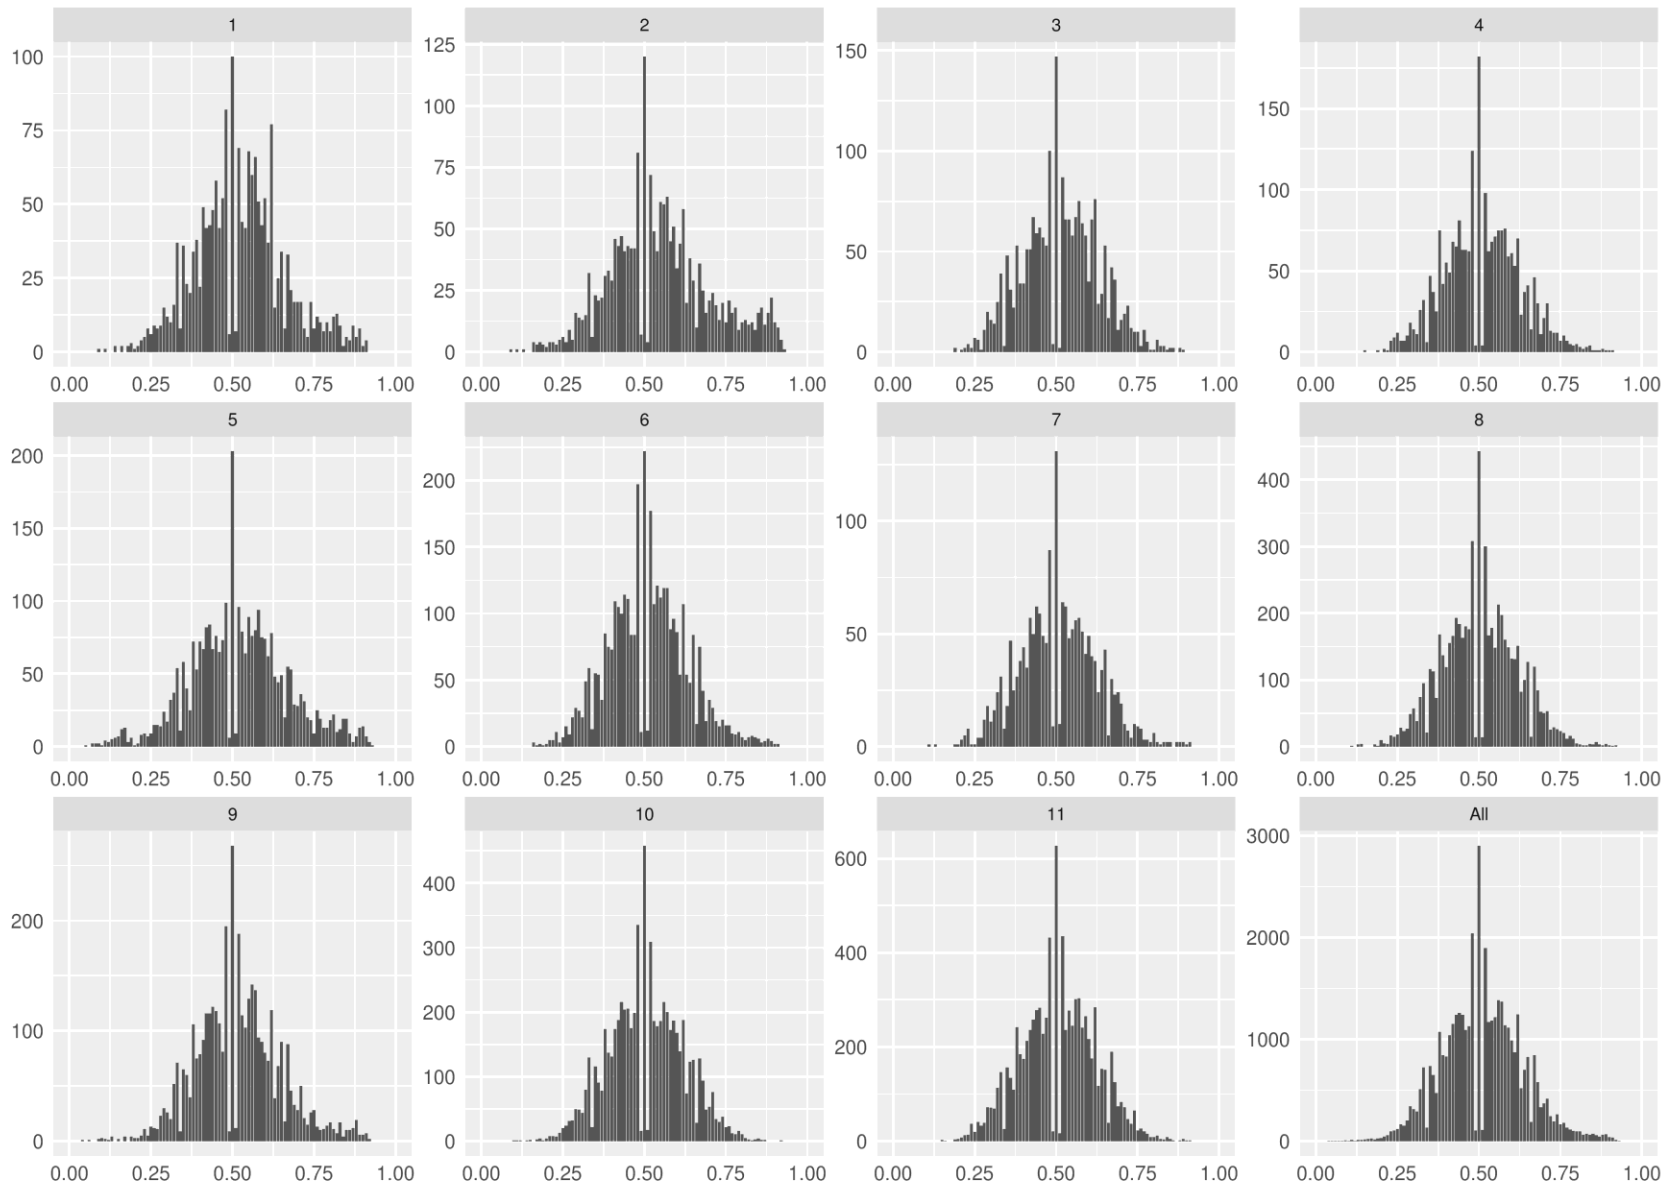

# *T. b. rhodesiense* - Isolate LWO07A

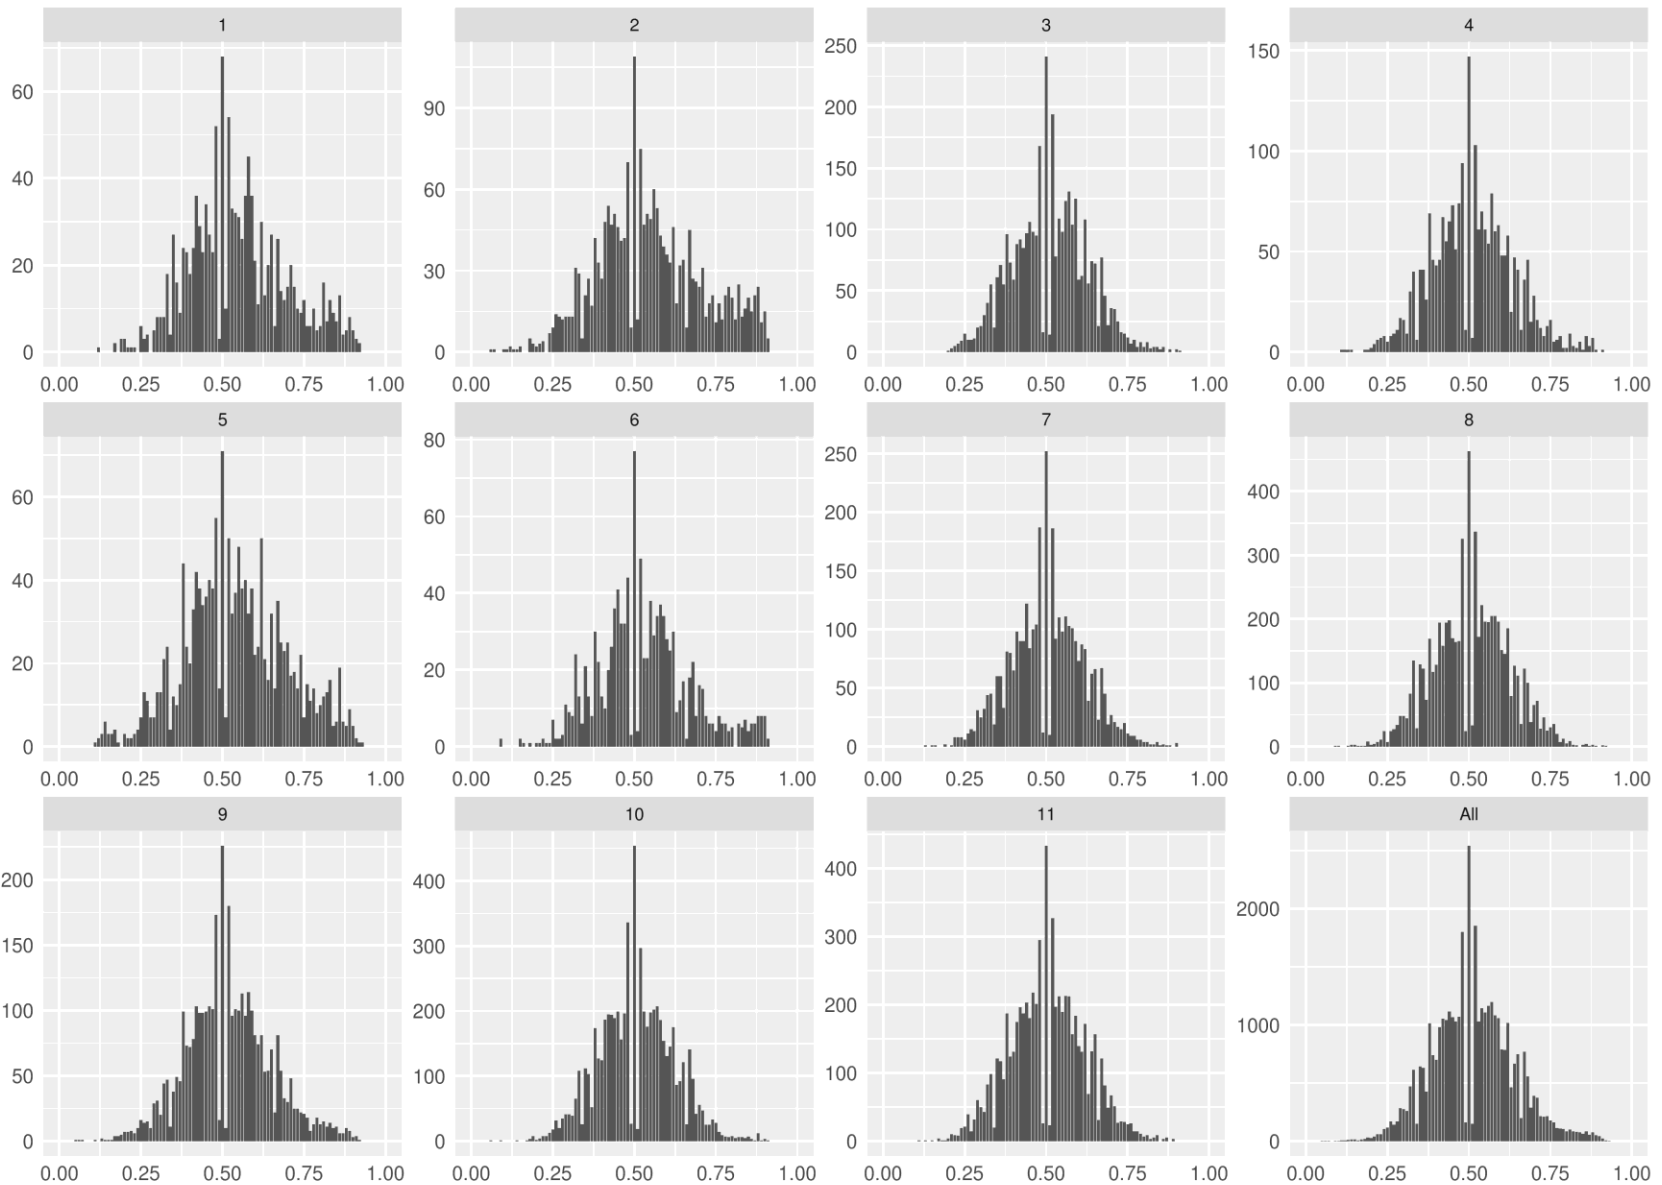

# *T. b. rhodesiense* - Isolate LWO011A

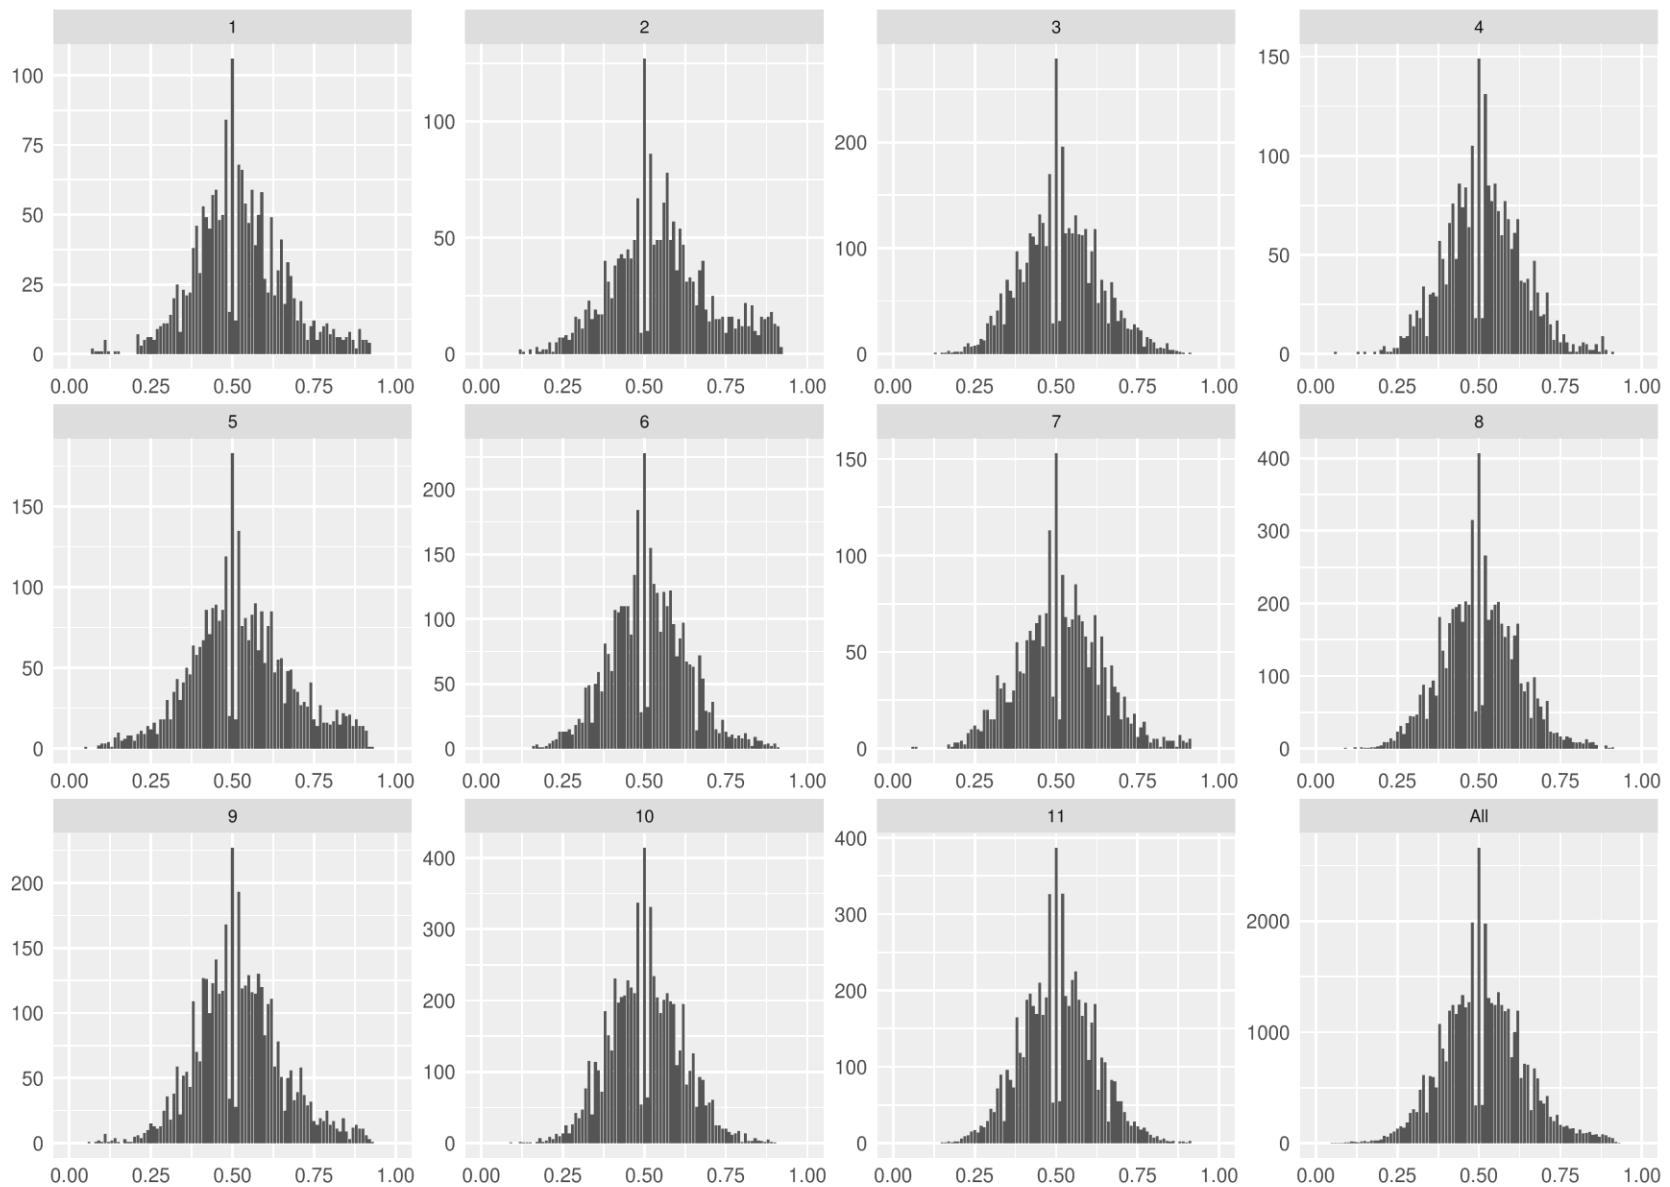

# *T. b. brucei* - Isolate STIB920

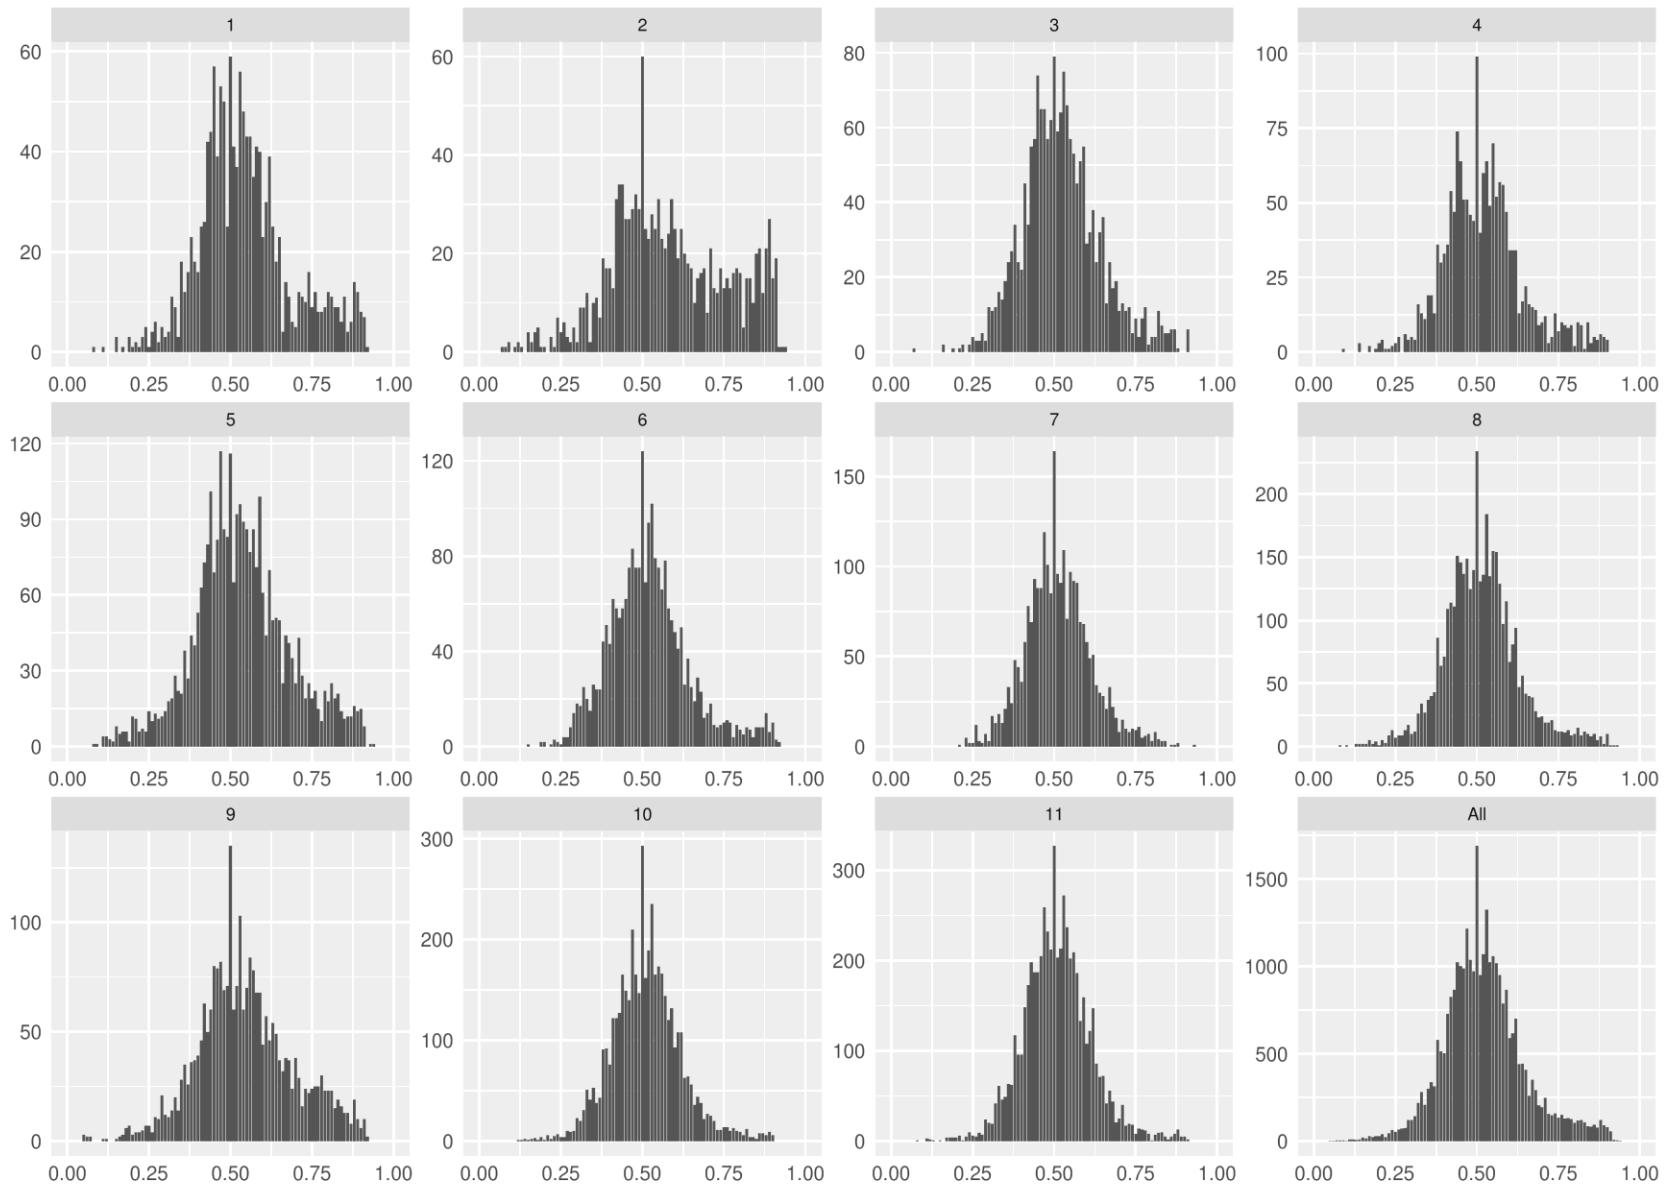

# *T. b. brucei* - Isolate STIB348TBABB

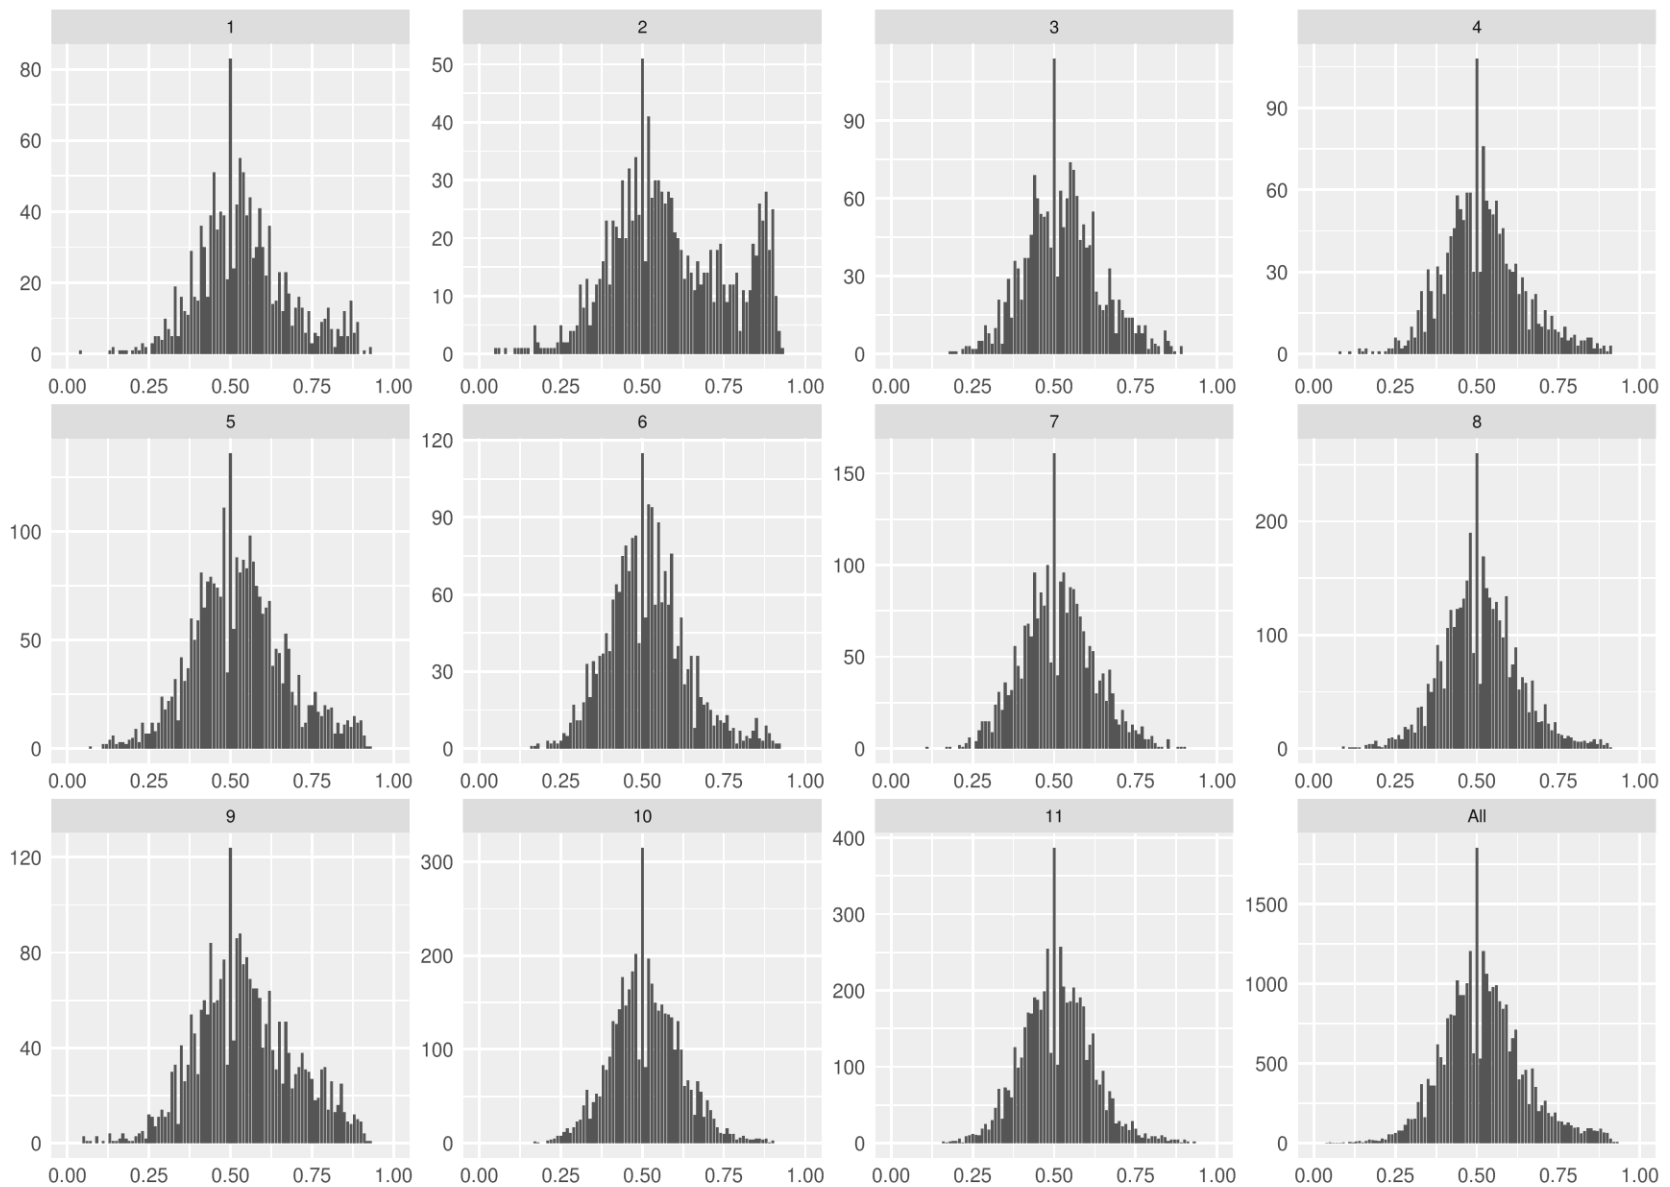

# *T. b. brucei* – Isolate Cow248

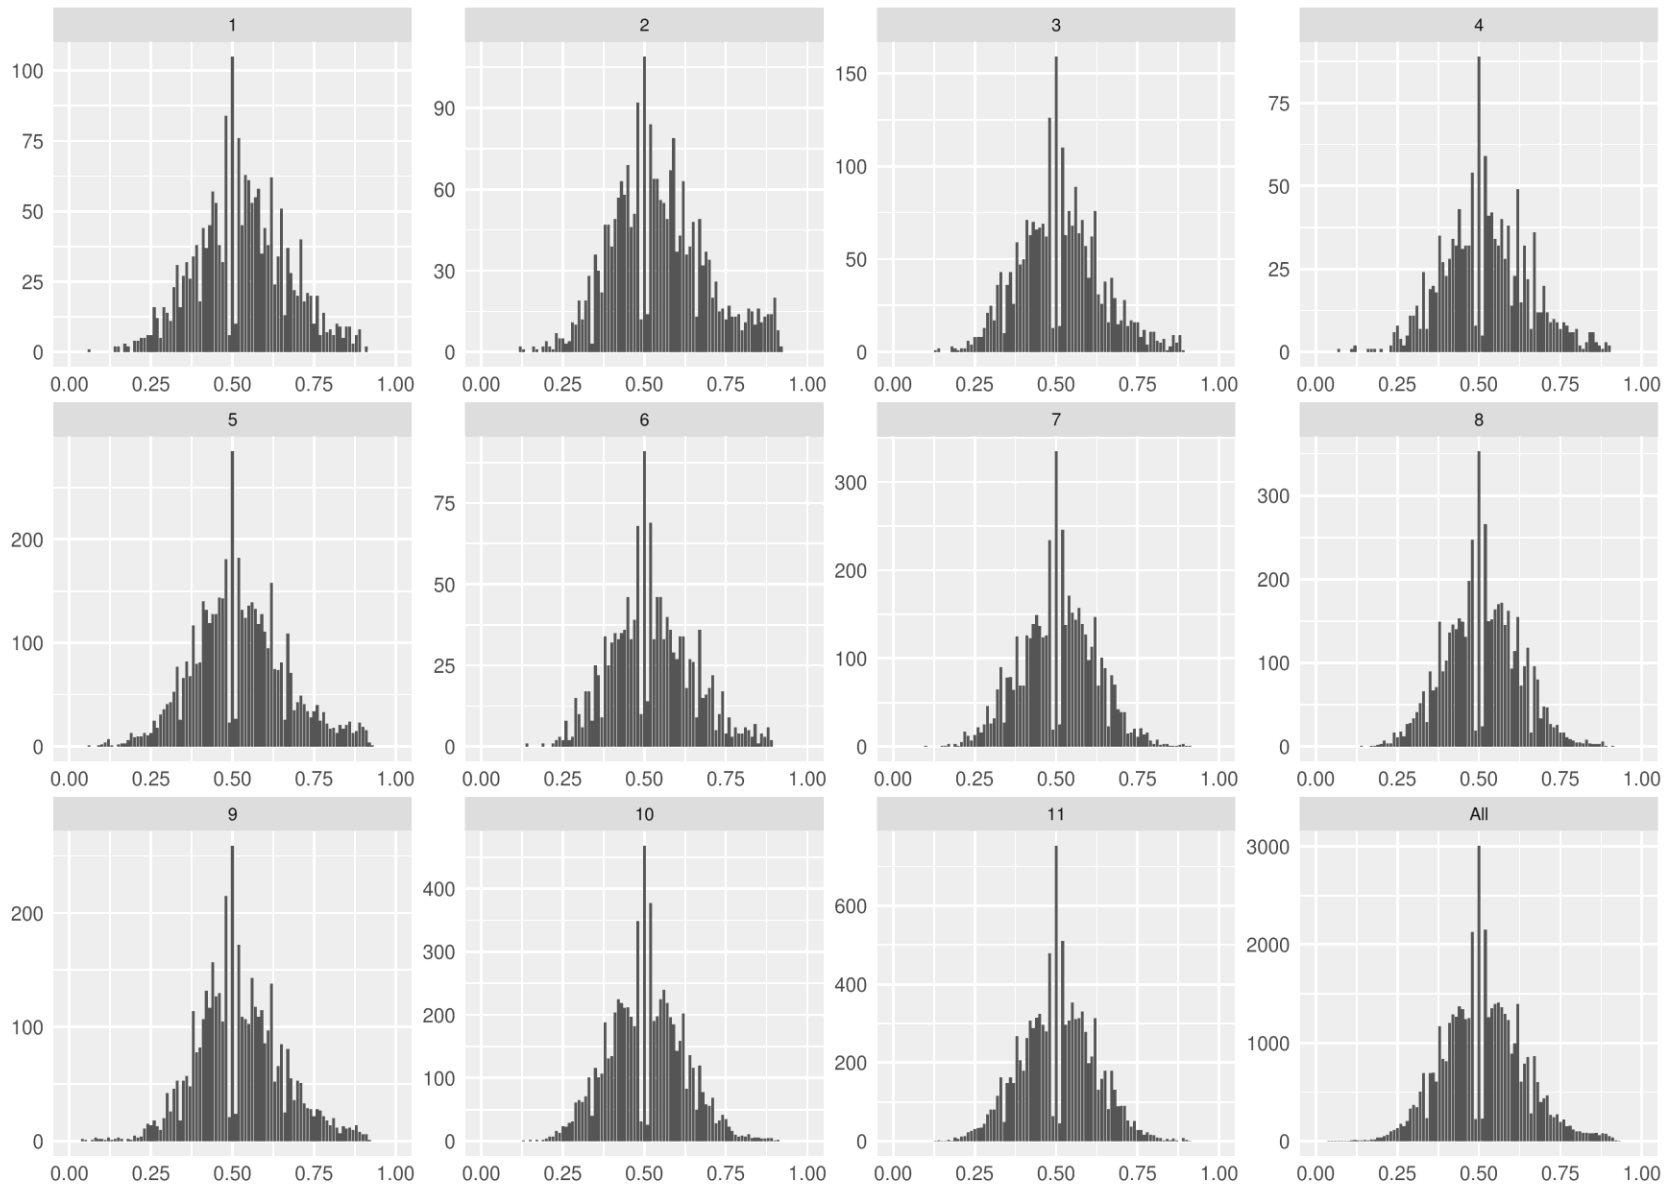

# *T. b. brucei* – Isolate 503

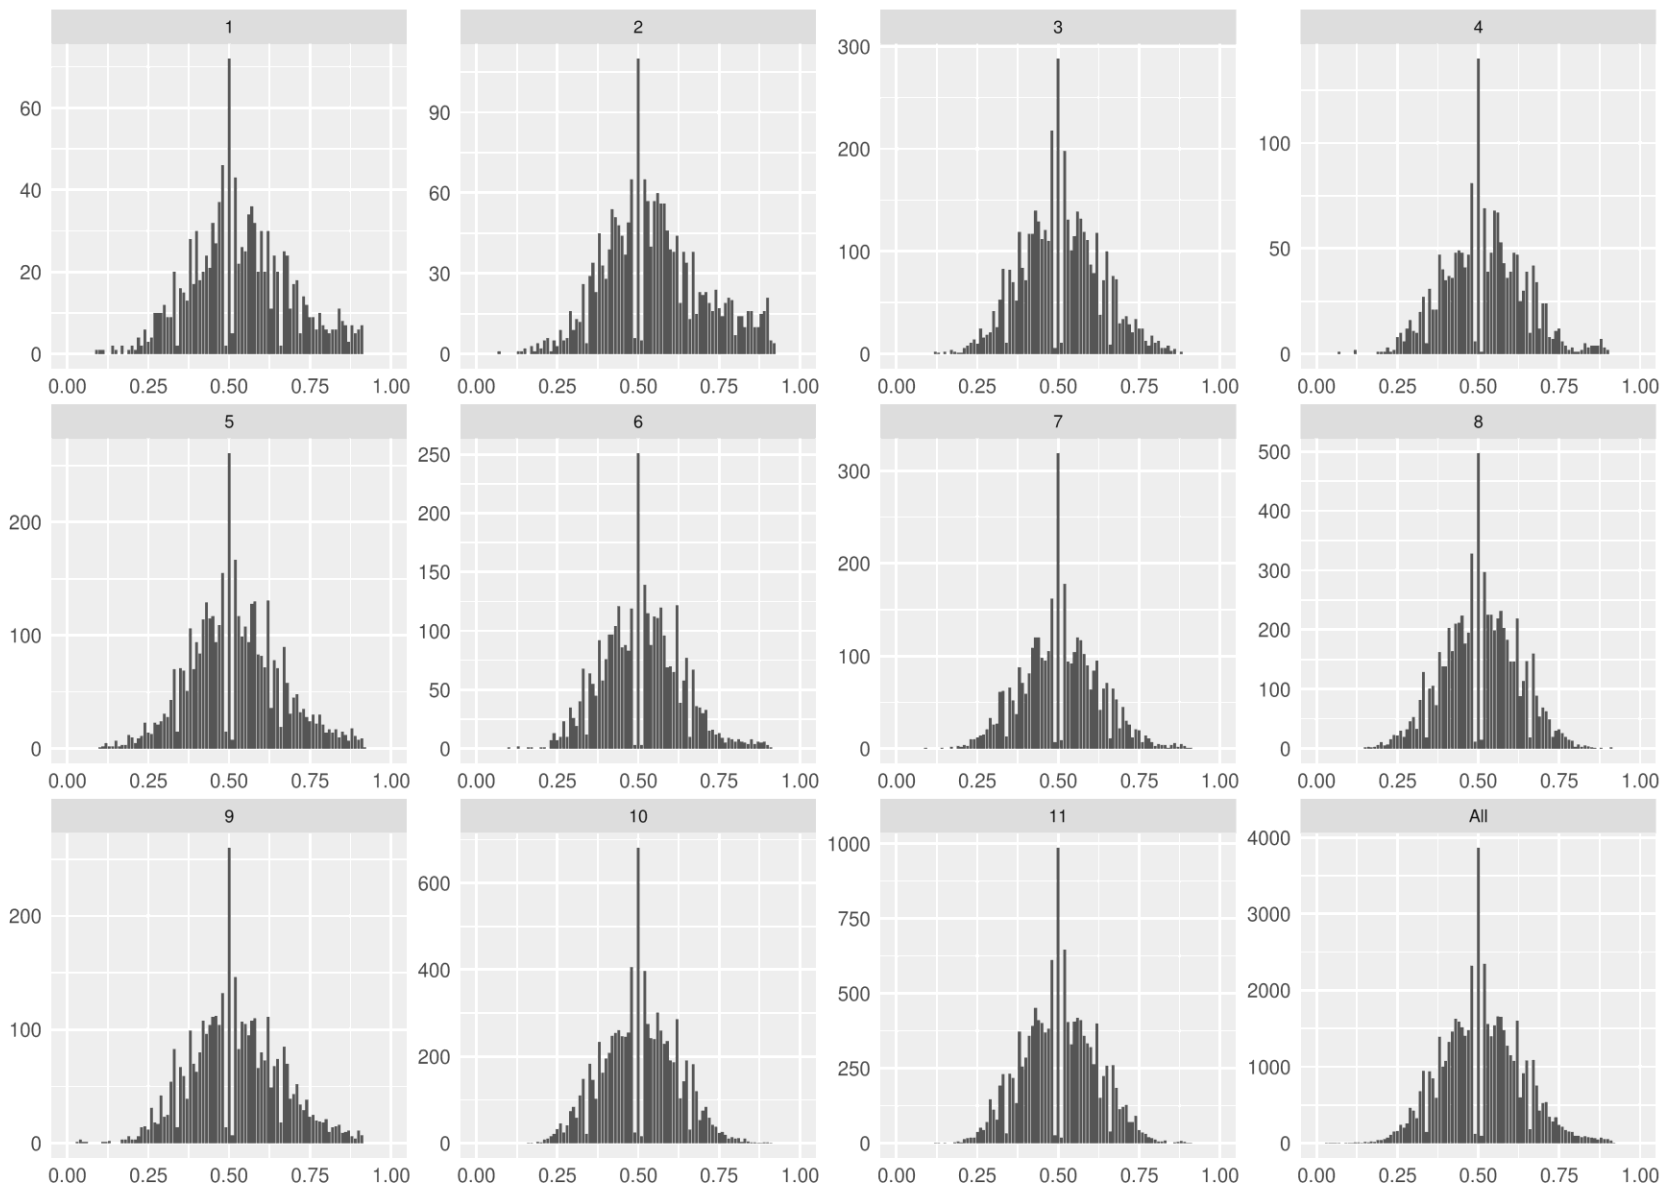

# *T. b. gambiense* – Isolate I5

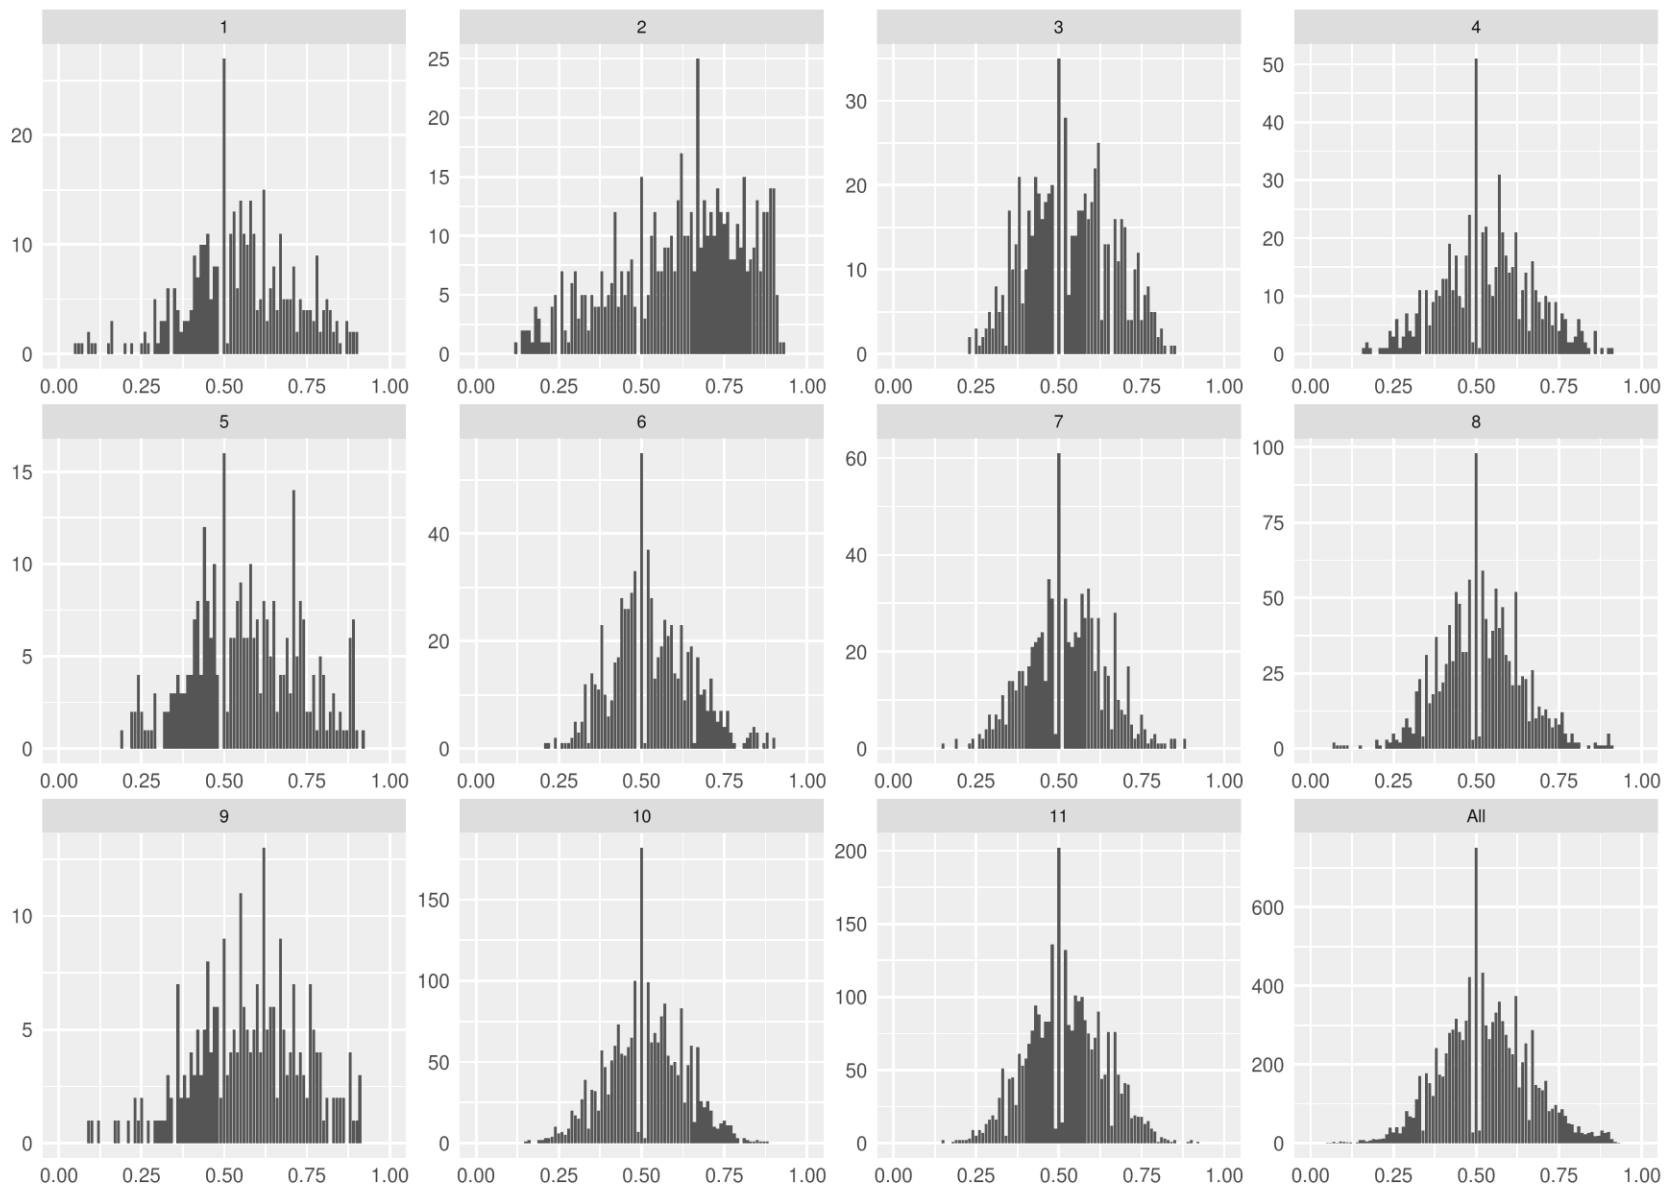



# *T. b. gambiense* – Isolate I7

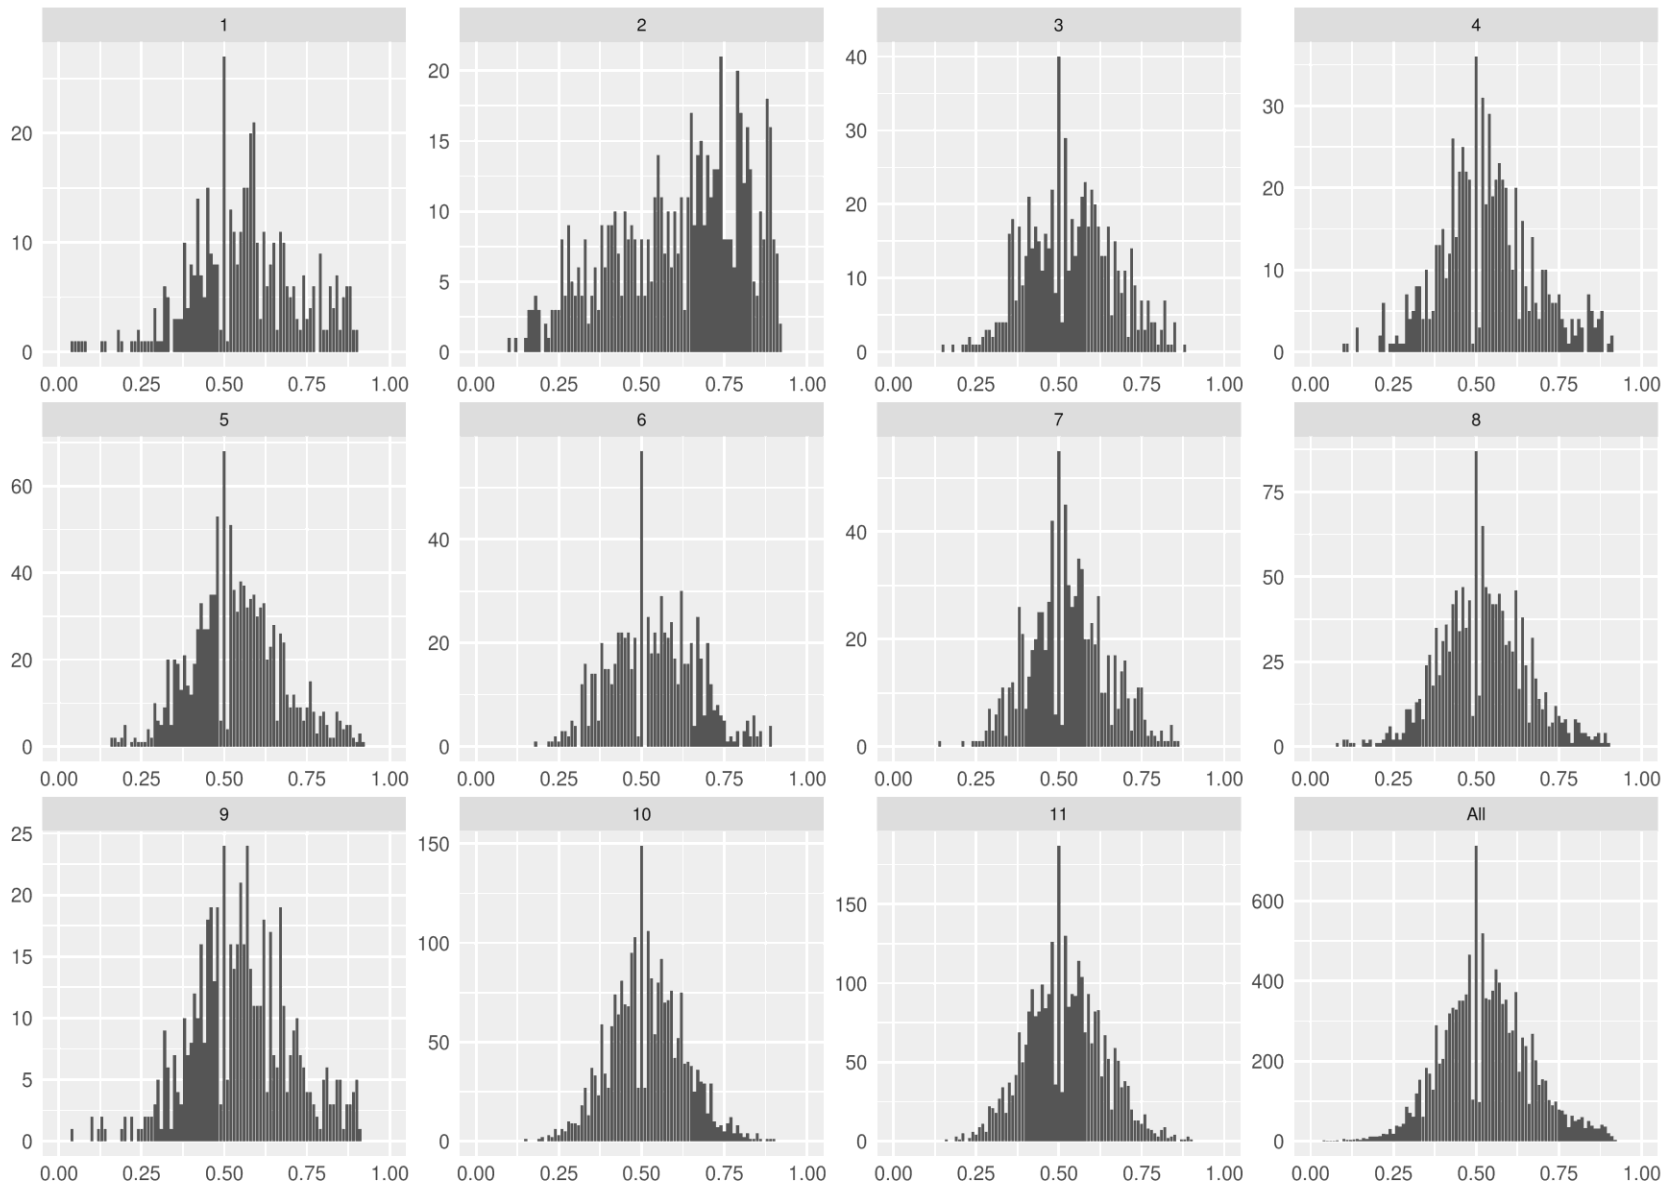

**Supplementary Figure 4: RDC variation along *T. brucei* chromosomes.** The blue line corresponds to the normalized RDC of each position, estimated by the ratio between the RDC and the genome coverage. Below, the protein-coding genes are depicted as rectangles drawn as proportional to their length, and their coding strand is indicated by their position above (top strand) or below (bottom strand) the central line. Cyan boxes represent VSGs and ESAGs. Black rectangles represent all other genes. Gaps are represented by gene-less regions with no read coverage. The possible regions of segmental duplication are highlighted by red boxes.

503-Tb927.08\_v5.1 ] Isolate-Chromosome

Example:

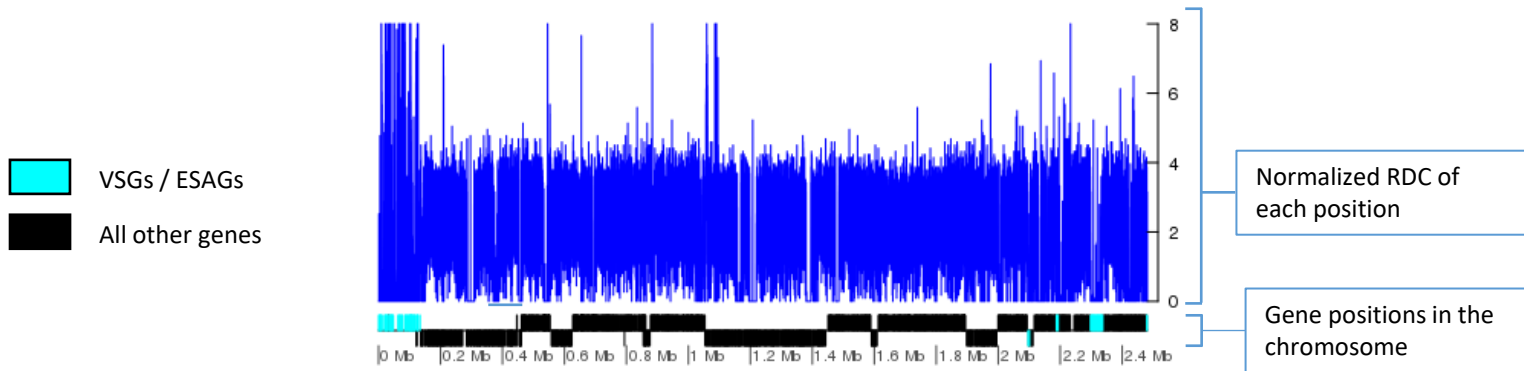

Isolate  
503

503-Tb927.01\_v5.1

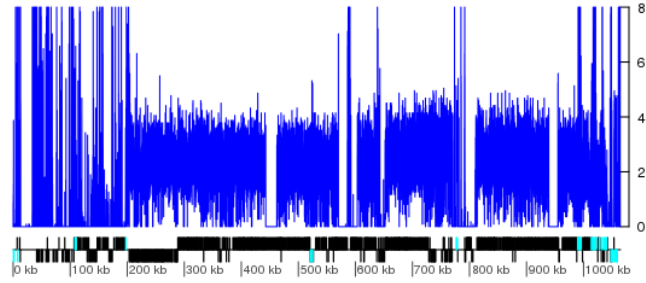

503-Tb927.02\_v5.1

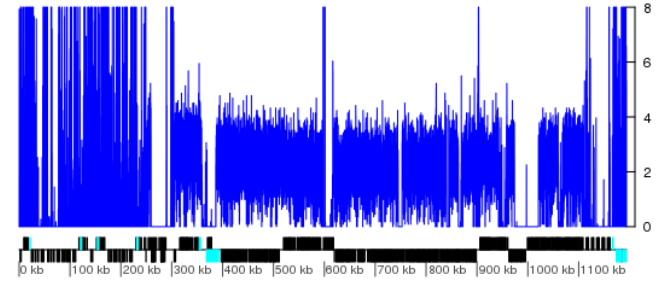

503-Tb927.03\_v5.1

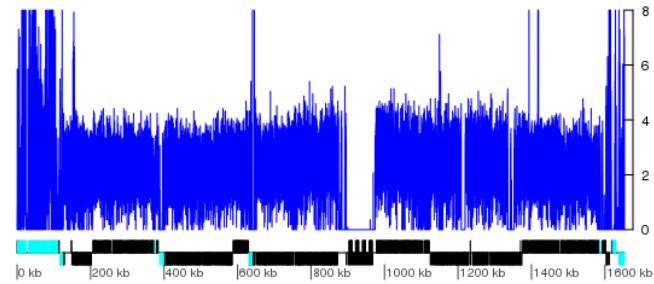

503-Tb927.04\_v5.1

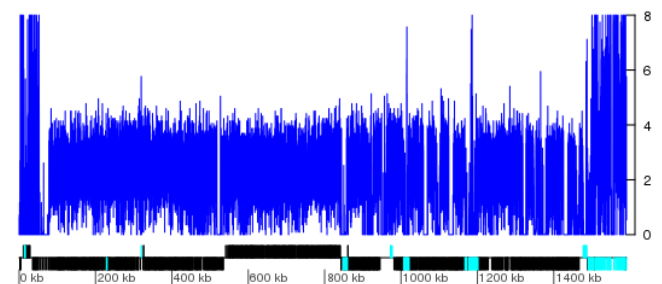

503-Tb927.05\_v5.1

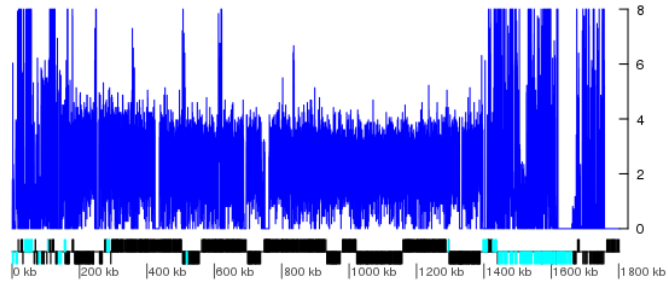

503-Tb927.06\_v5.1

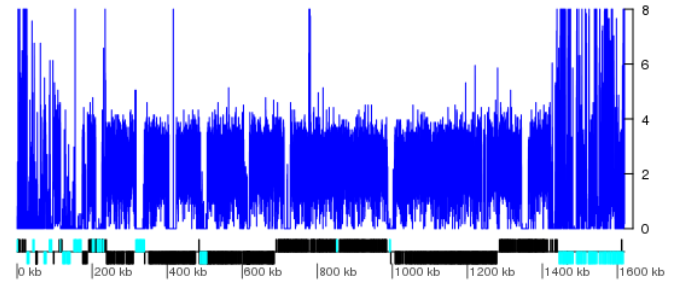

503-Tb927.07\_v5.1

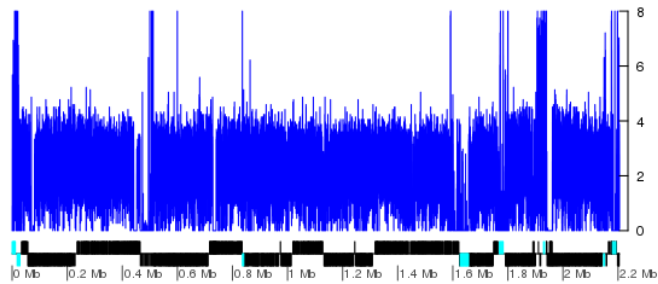

503-Tb927.08\_v5.1

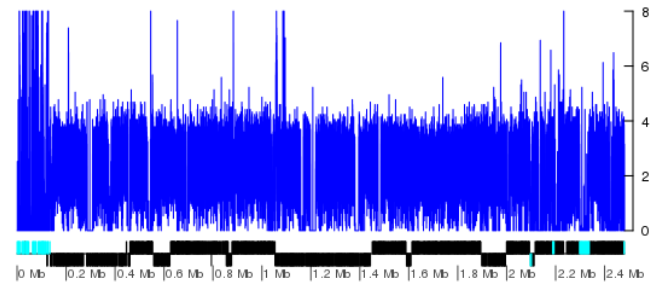

503-Tb927.09\_v5.1

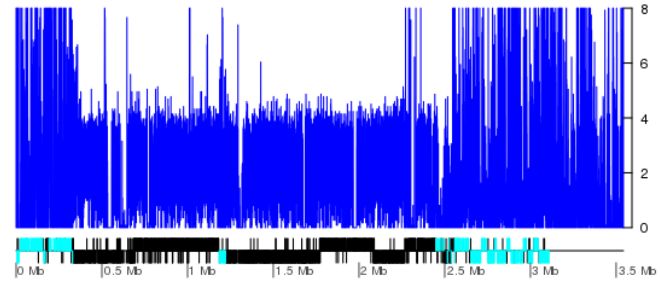

503-Tb927.10\_v5.1

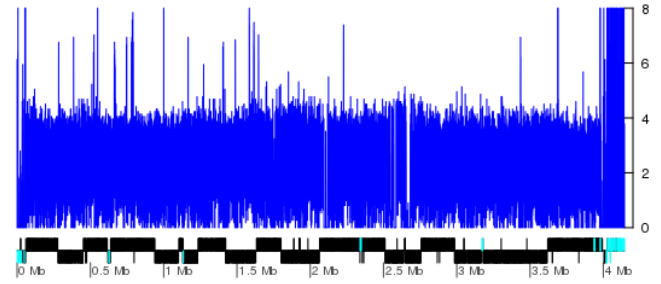

503-Tb927.11\_v5.1

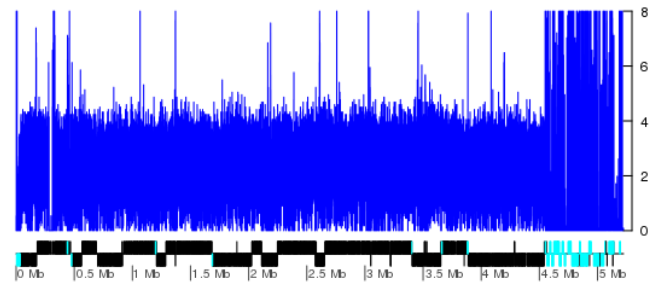

Isolate  
Angwen

Angwen-Tb927.01\_v5.1

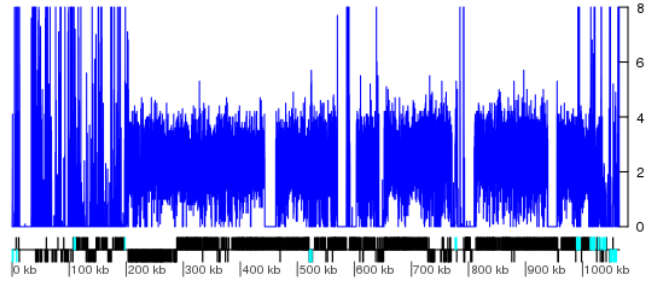

Angwen-Tb927.02\_v5.1

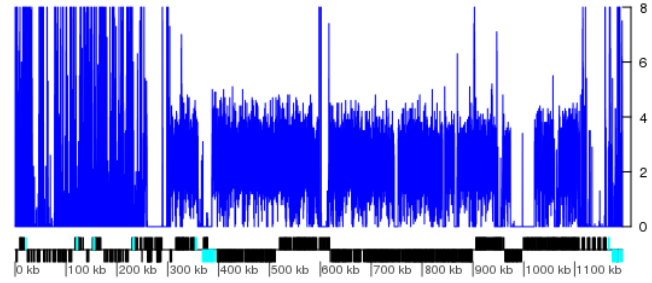

Angwen-Tb927.03\_v5.1

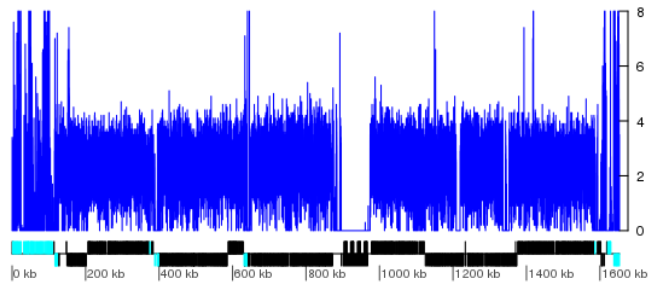

Angwen-Tb927.04\_v5.1

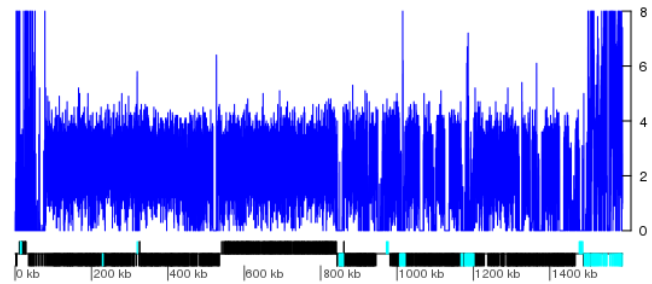



Angwen-Tb927.05\_v5.1

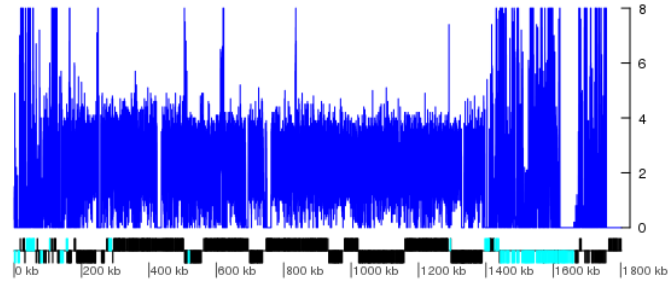

Angwen-Tb927.06\_v5.1

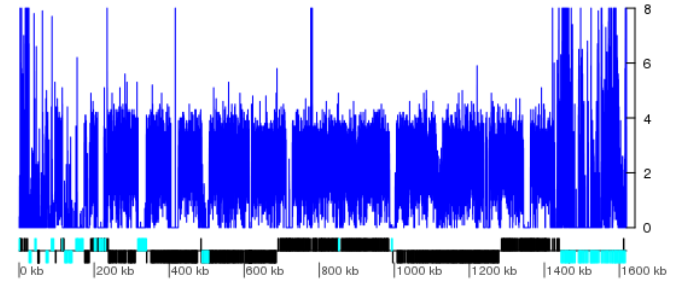

Angwen-Tb927.07\_v5.1

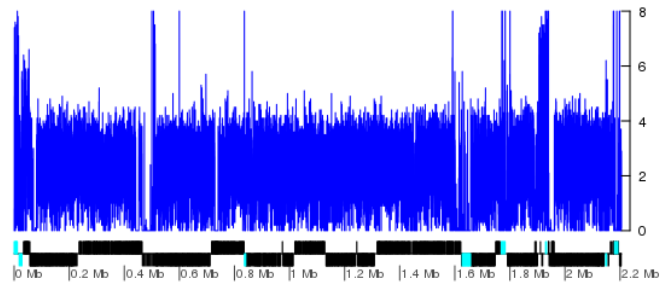

Angwen-Tb927.08\_v5.1

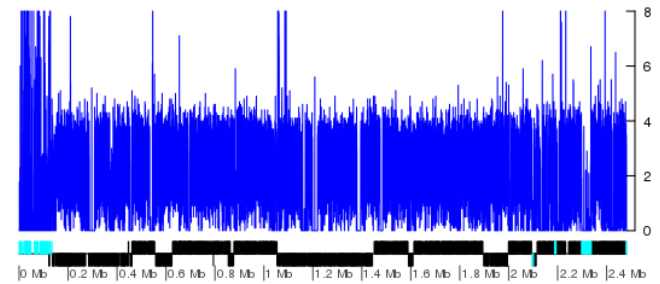

Angwen-Tb927.09\_v5.1

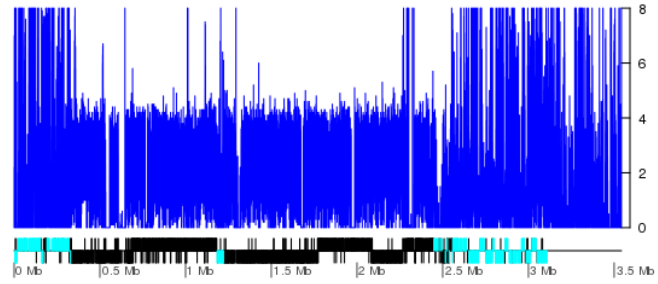

Angwen-Tb927.10\_v5.1

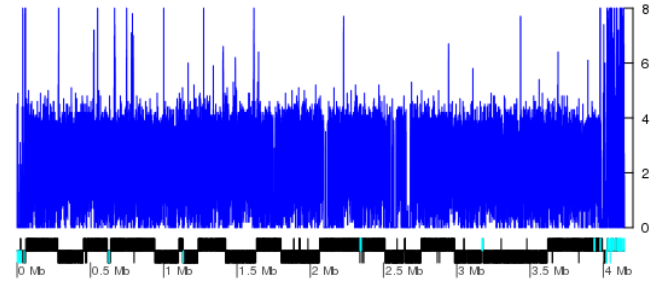

Angwen-Tb927.11\_v5.1

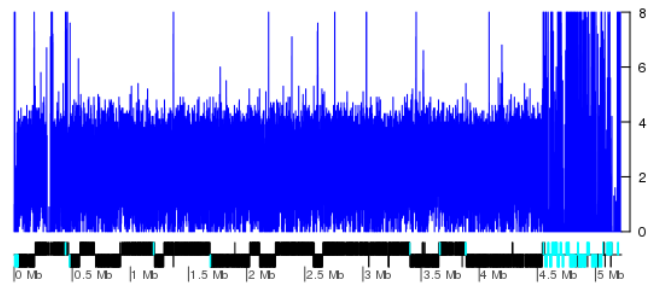

Isolate  
cow428

cow428-Tb927.01\_v5.1

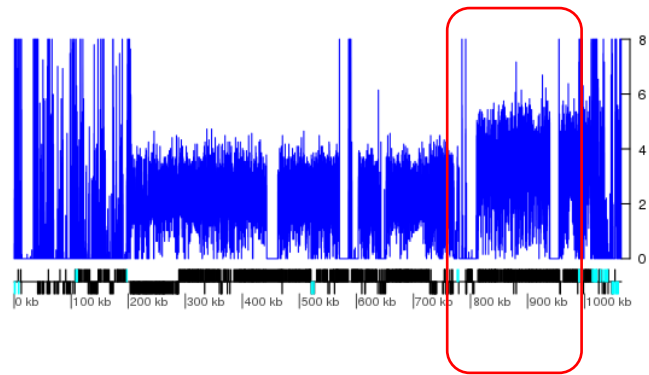

cow428-Tb927.02\_v5.1

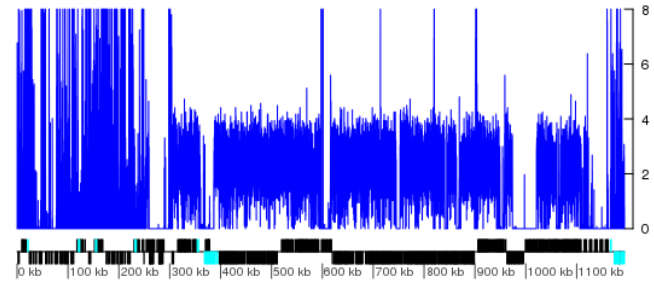

cow428-Tb927.03\_v5.1

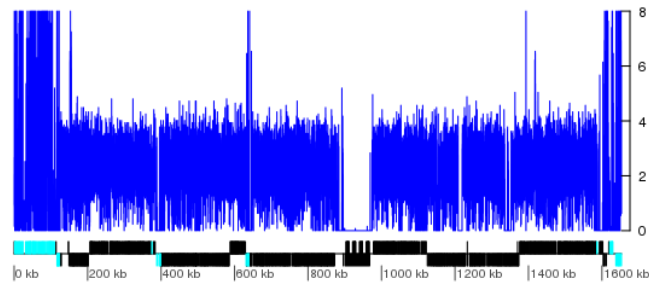

cow428-Tb927.04\_v5.1

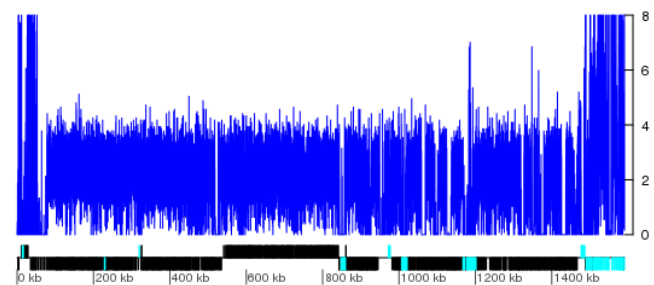

cow428-Tb927.05\_v5.1

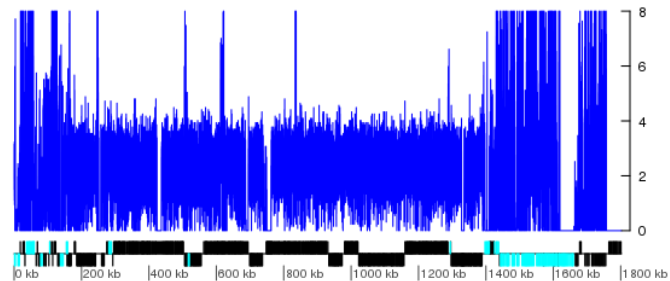

cow428-Tb927.06\_v5.1

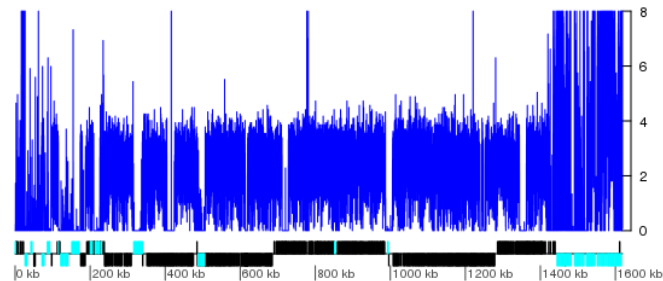

cow428-Tb927.07\_v5.1

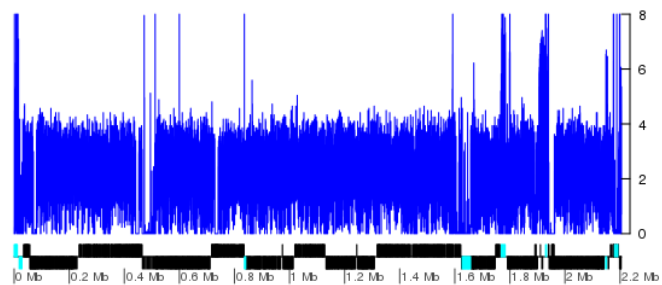

cow428-Tb927.08\_v5.1

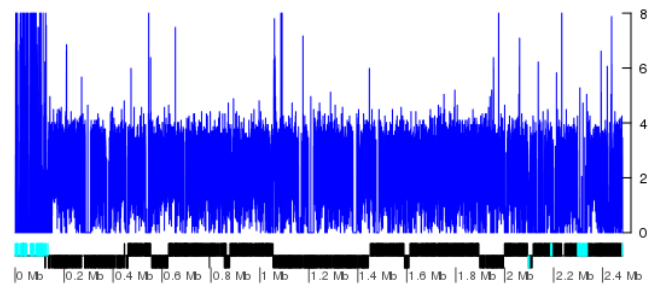

cow428-Tb927.09\_v5.1

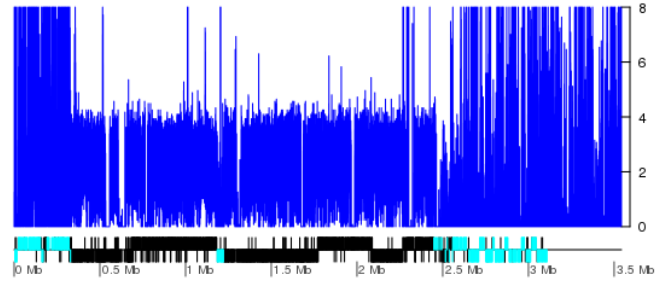

cow428-Tb927.10\_v5.1

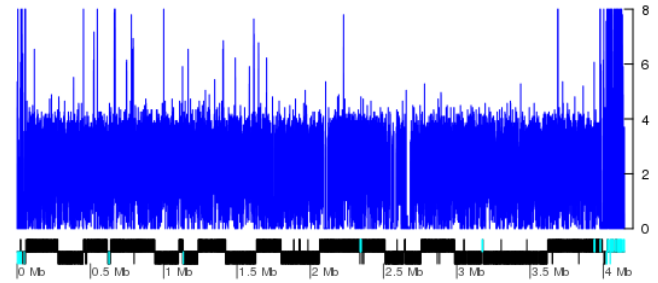

cow428-Tb927.11\_v5.1

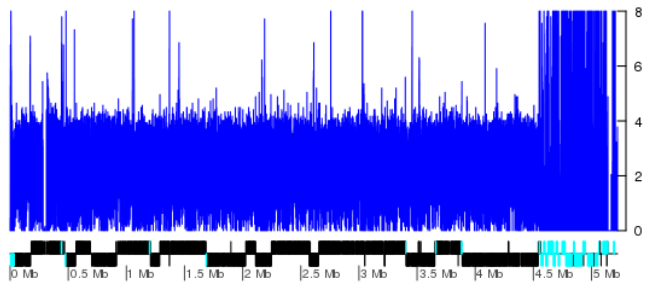

Isolate  
D1

D1-Tb927.01\_v5.1

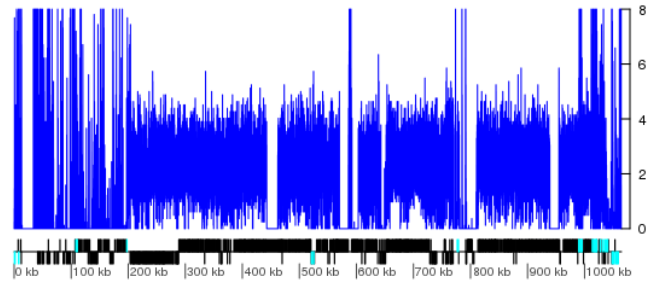

D1-Tb927.02\_v5.1

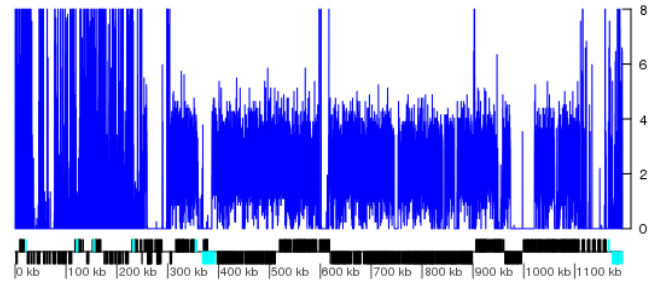

D1-Tb927.03\_v5.1

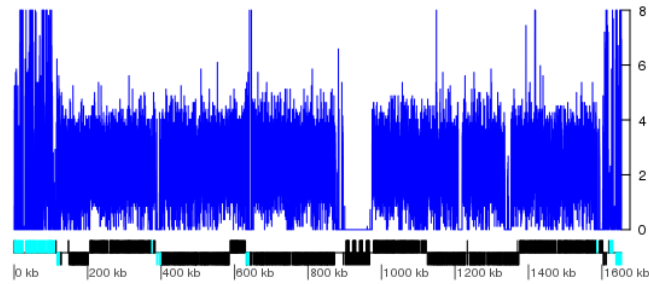

D1-Tb927.04\_v5.1

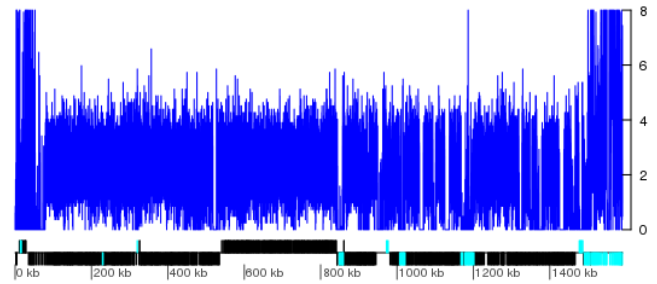



D1-Tb927.05\_v5.1

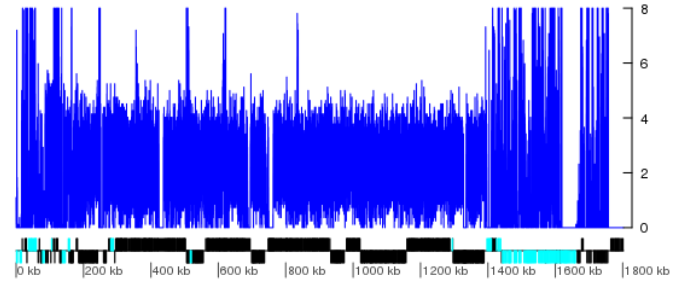

D1-Tb927.06\_v5.1

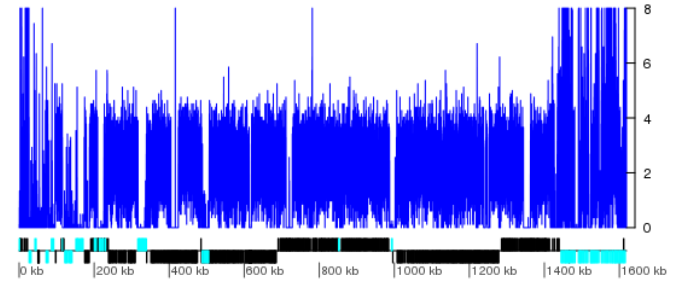

D1-Tb927.07\_v5.1

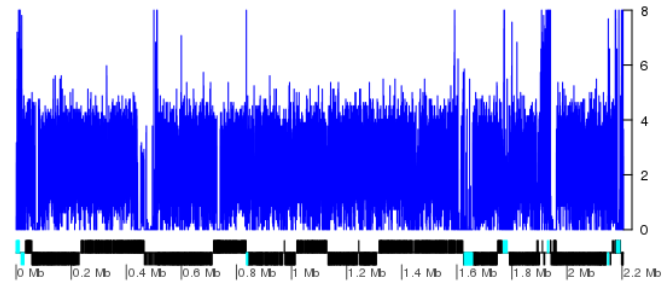

D1-Tb927.08\_v5.1

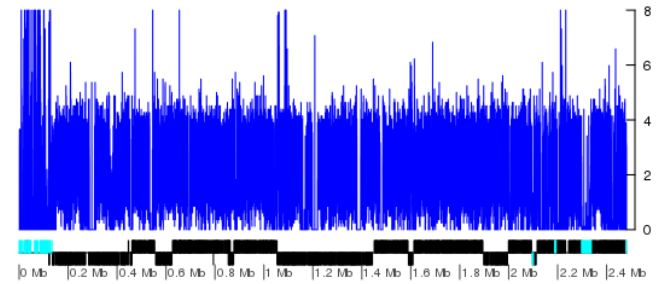

D1-Tb927.09\_v5.1

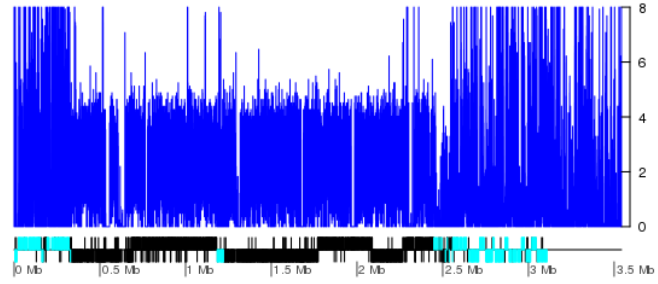

D1-Tb927.10\_v5.1

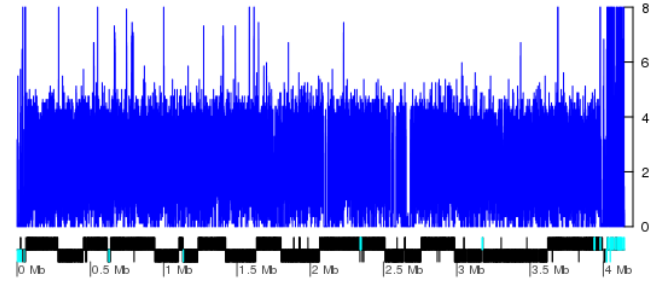

D1-Tb927.11\_v5.1

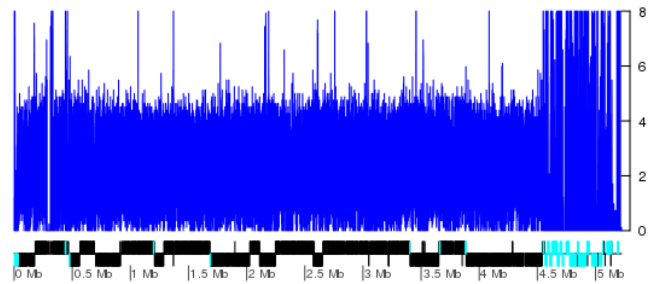

Isolate  
D2

D2-Tb927.01\_v5.1

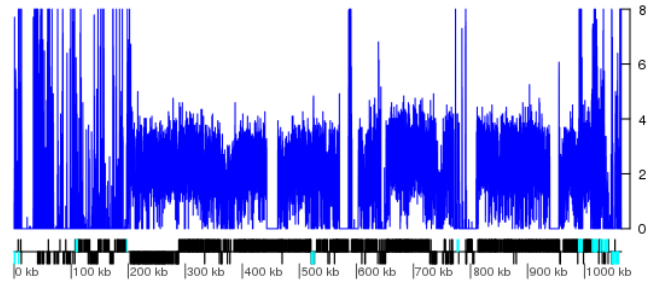

D2-Tb927.02\_v5.1

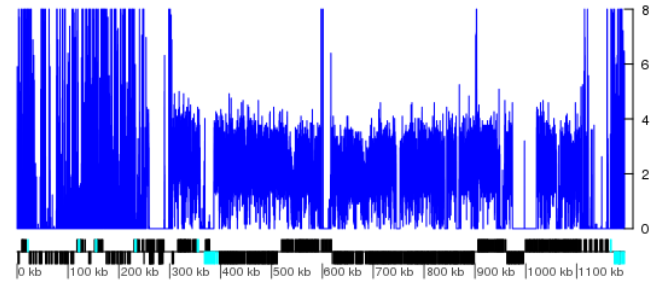

D2-Tb927.03\_v5.1

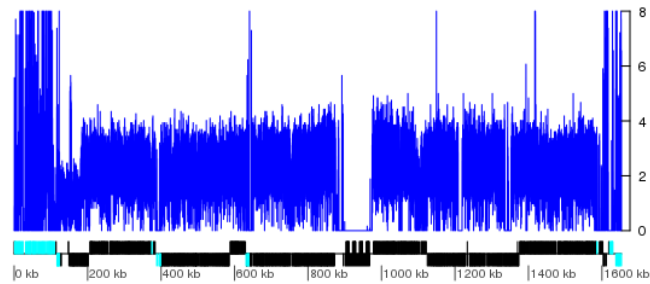

D2-Tb927.04\_v5.1

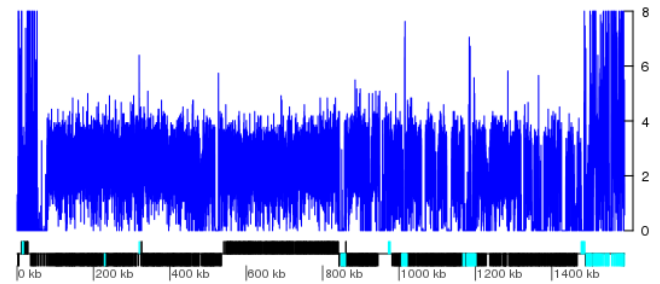

D2-Tb927.05\_v5.1

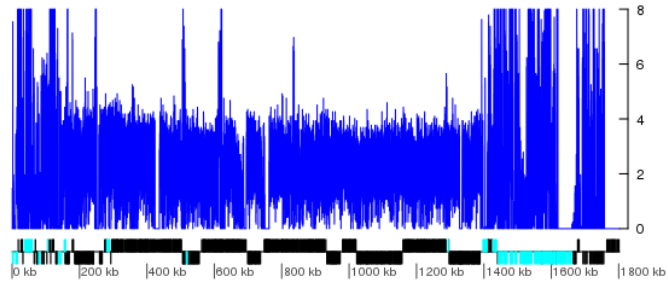

D2-Tb927.06\_v5.1

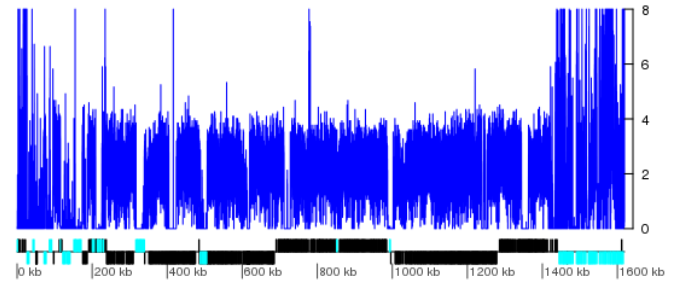

D2-Tb927.07\_v5.1

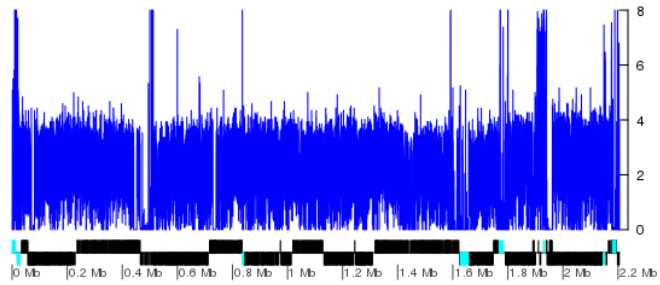

D2-Tb927.08\_v5.1

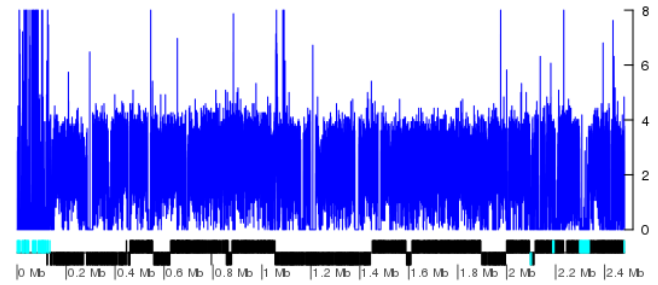

D2-Tb927.09\_v5.1

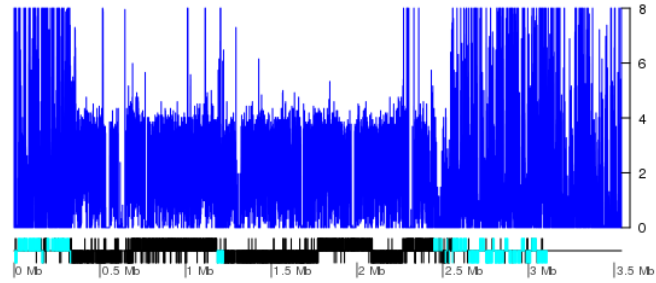

D2-Tb927.10\_v5.1

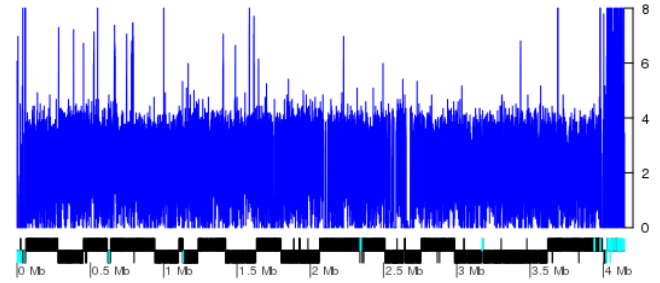

D2-Tb927.11\_v5.1

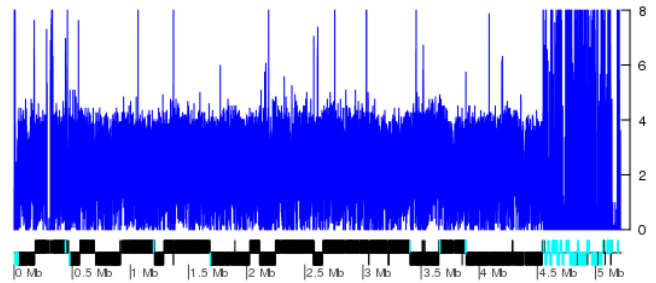

Isolate  
D3

D3-Tb927.01\_v5.1

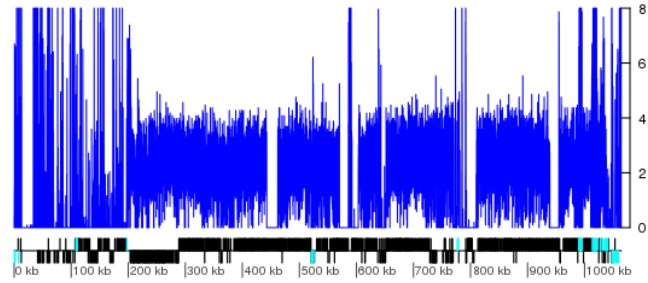

D3-Tb927.02\_v5.1

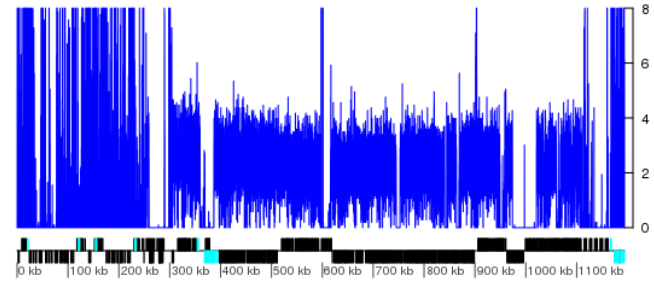

D3-Tb927.03\_v5.1

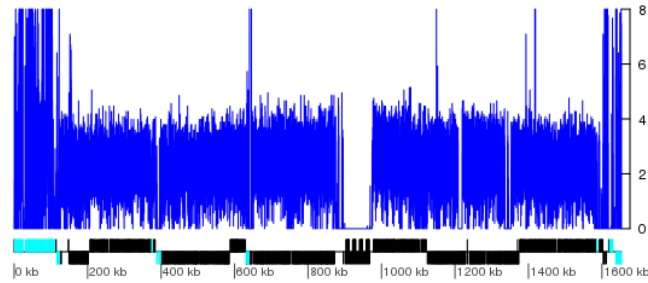

D3-Tb927.04\_v5.1

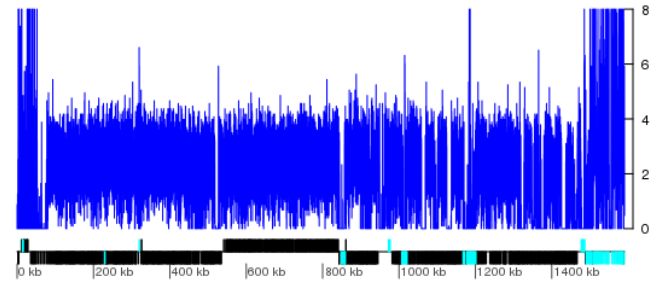



D3-Tb927.05\_v5.1

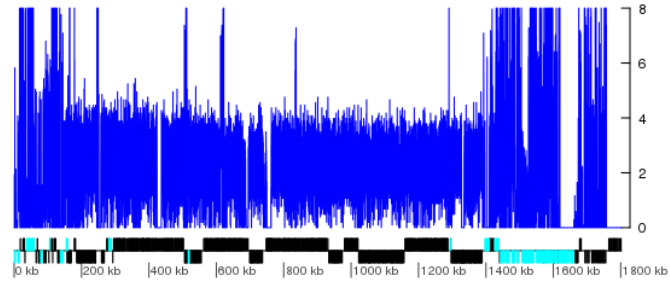

D3-Tb927.06\_v5.1

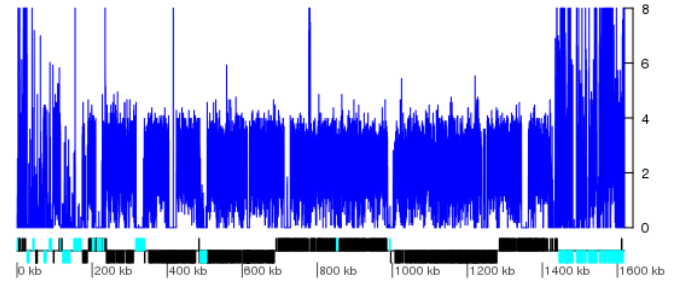

D3-Tb927.07\_v5.1

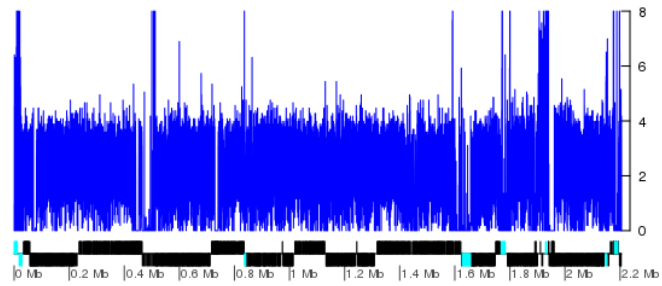

D3-Tb927.08\_v5.1

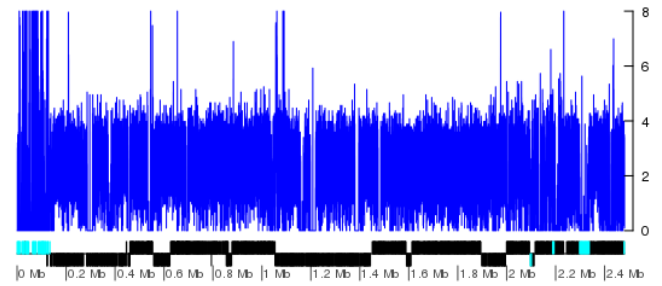

D3-Tb927.09\_v5.1

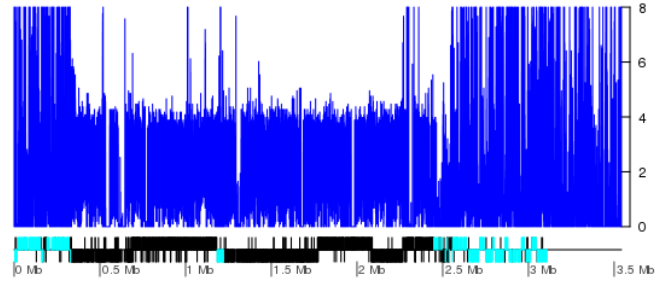

D3-Tb927.10\_v5.1

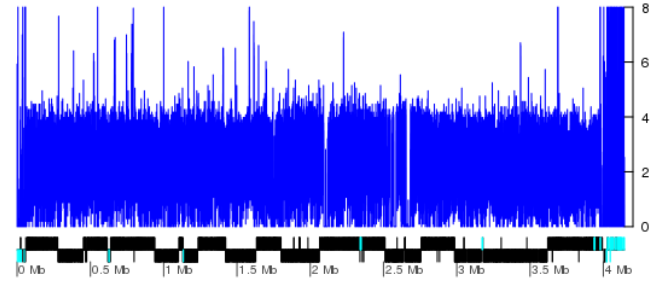

D3-Tb927.11\_v5.1

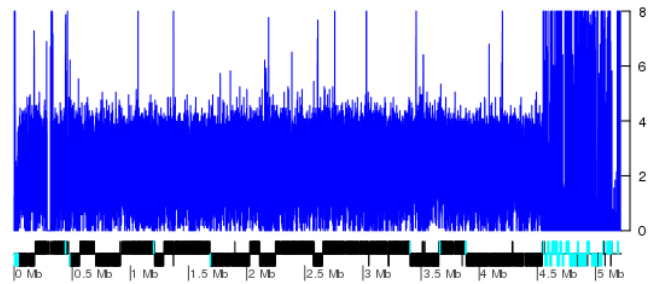

Isolate  
D4

D4-Tb927.01\_v5.1

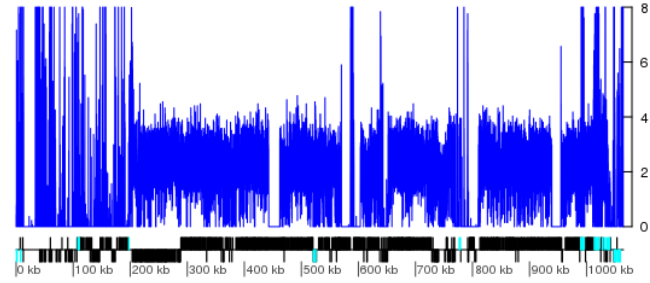

D4-Tb927.02\_v5.1

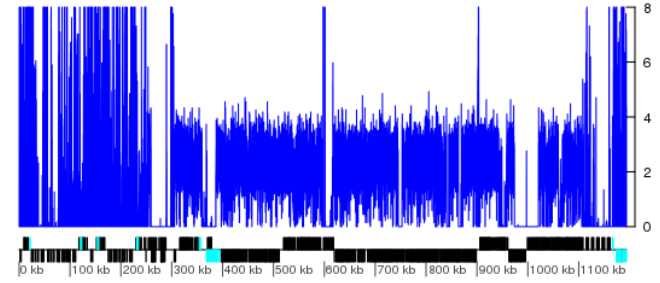

D4-Tb927.03\_v5.1

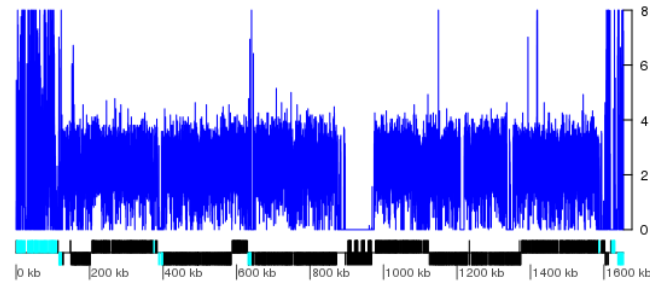

D4-Tb927.04\_v5.1

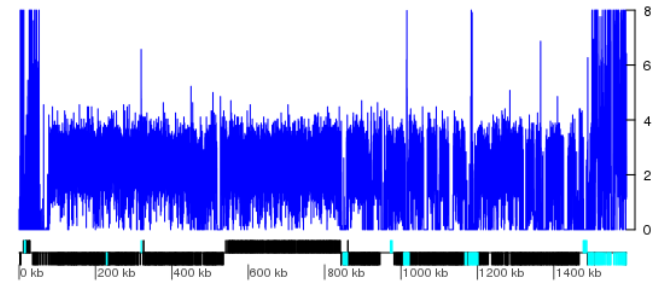

D4-Tb927.05\_v5.1

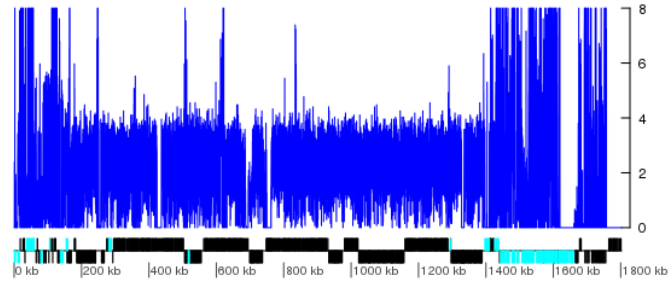

D4-Tb927.06\_v5.1

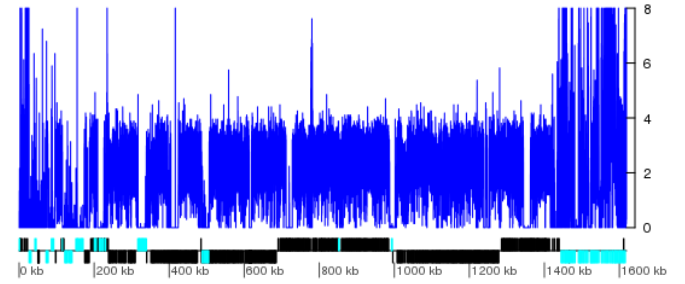

D4-Tb927.07\_v5.1

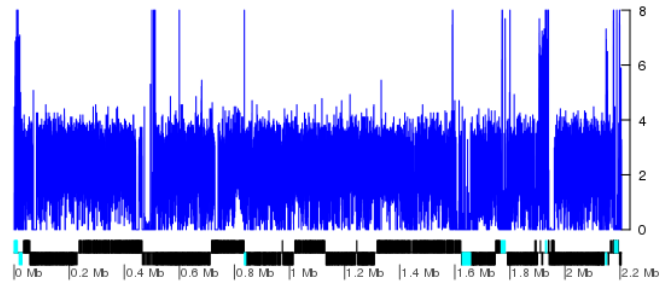

D4-Tb927.08\_v5.1

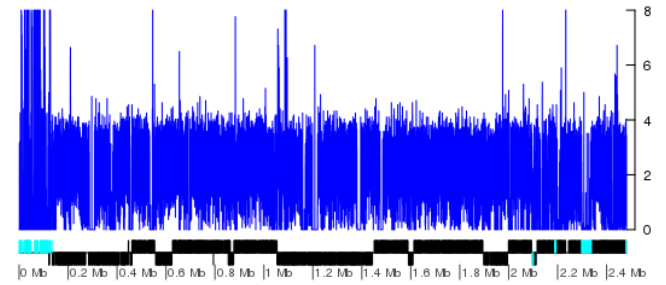

D4-Tb927.09\_v5.1

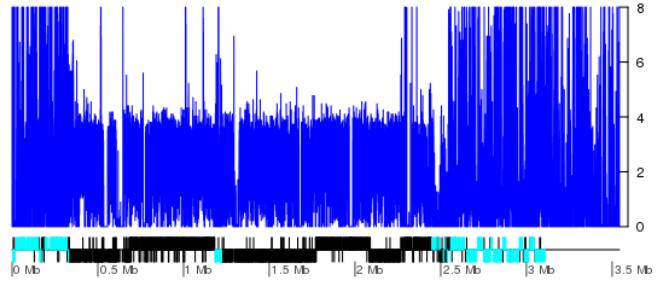

D4-Tb927.10\_v5.1

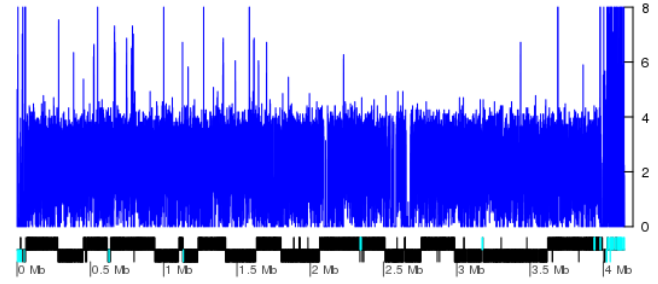

D4-Tb927.11\_v5.1

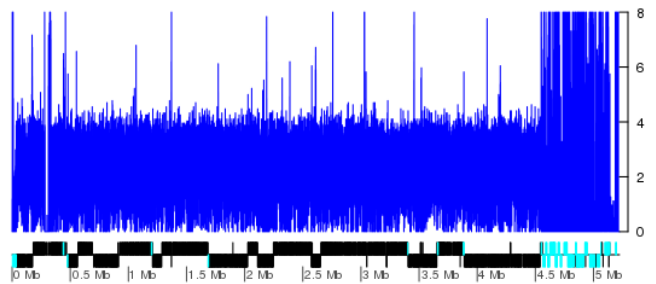

Isolate  
D5

D5-Tb927.01\_v5.1

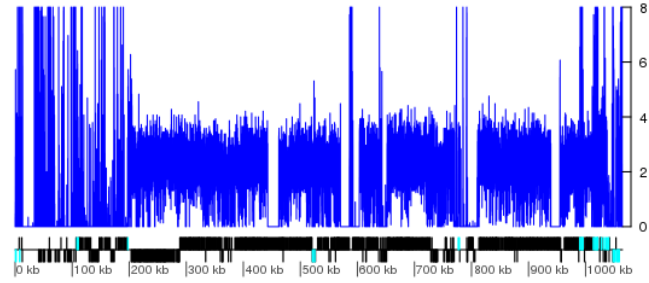

D5-Tb927.02\_v5.1

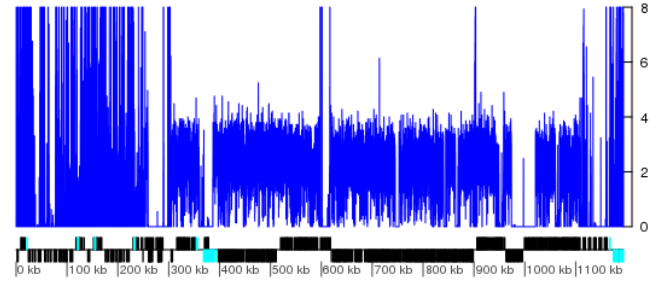

D5-Tb927.03\_v5.1

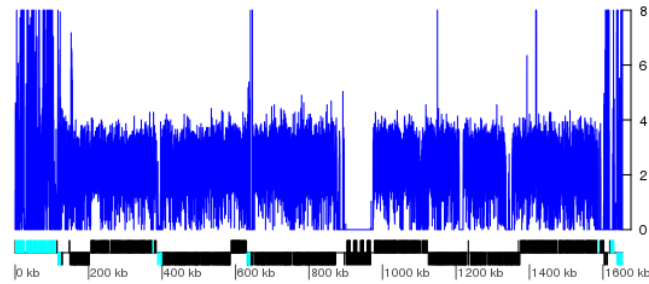

D5-Tb927.04\_v5.1

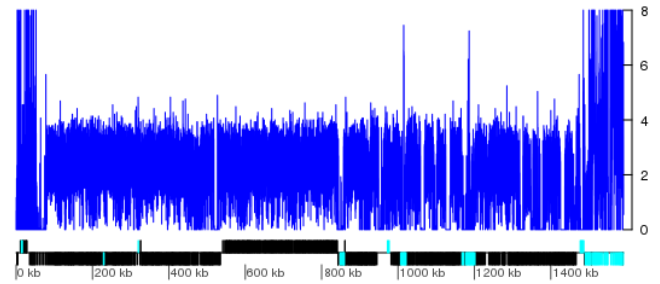



D5-Tb927.05\_v5.1

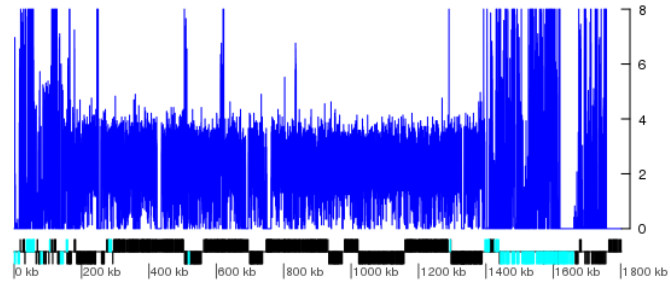

D5-Tb927.06\_v5.1

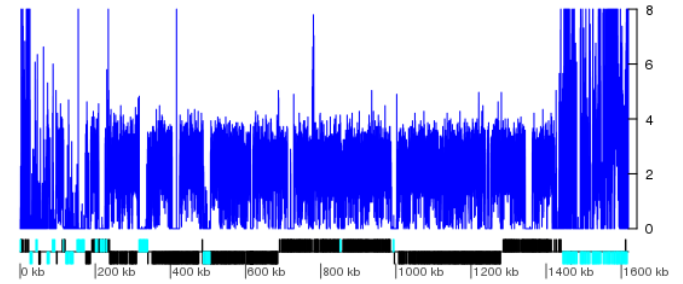

D5-Tb927.07\_v5.1

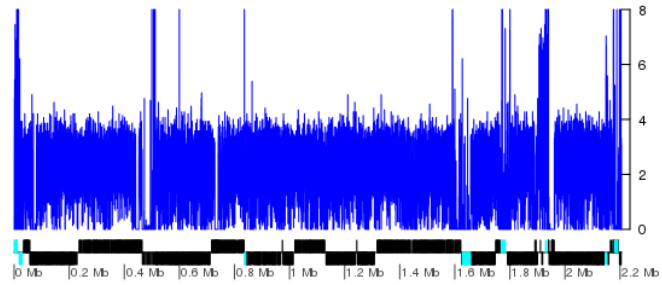

D5-Tb927.08\_v5.1

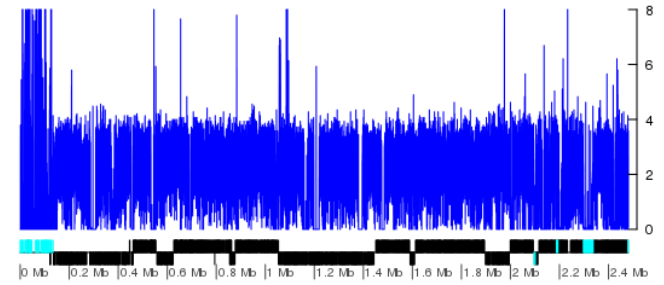

D5-Tb927.09\_v5.1

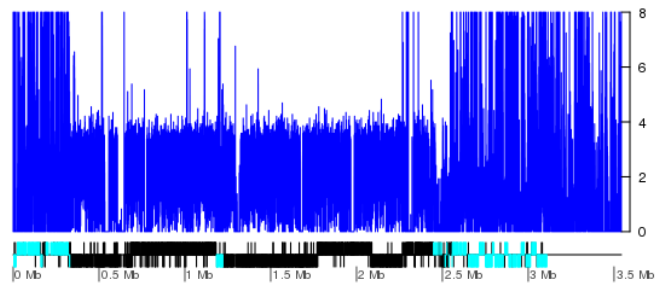

D5-Tb927.10\_v5.1

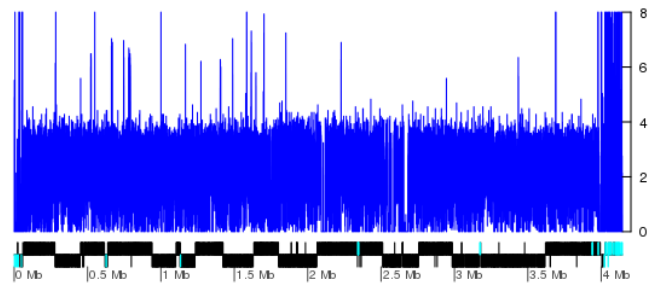

D5-Tb927.11\_v5.1

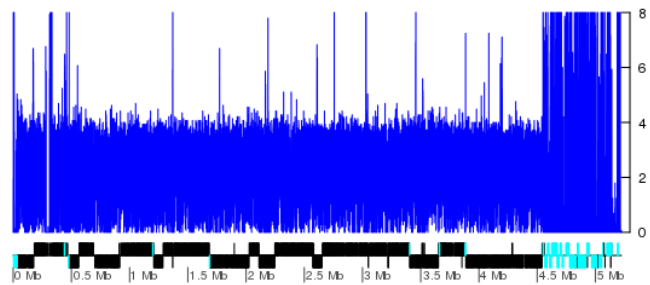

Isolate  
D7

D7-Tb927.01\_v5.1

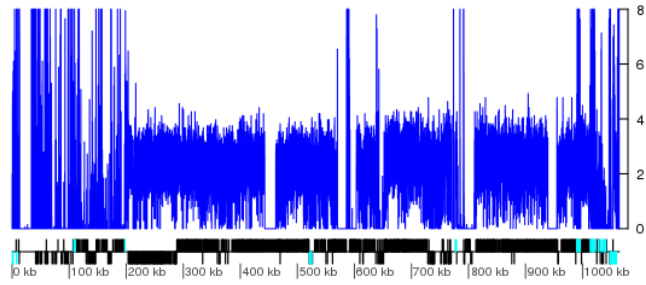

D7-Tb927.02\_v5.1

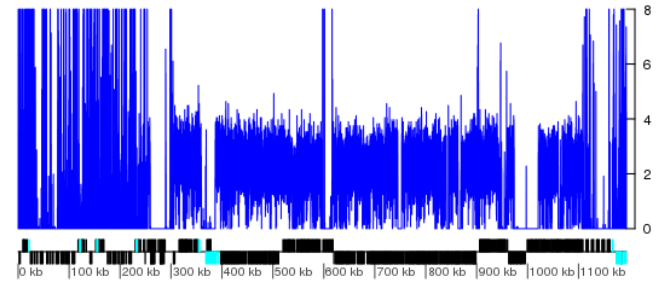

D7-Tb927.03\_v5.1

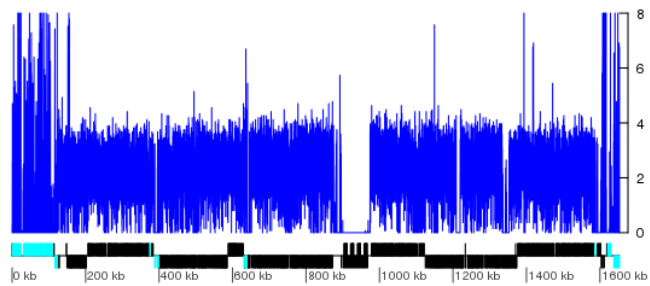

D7-Tb927.04\_v5.1

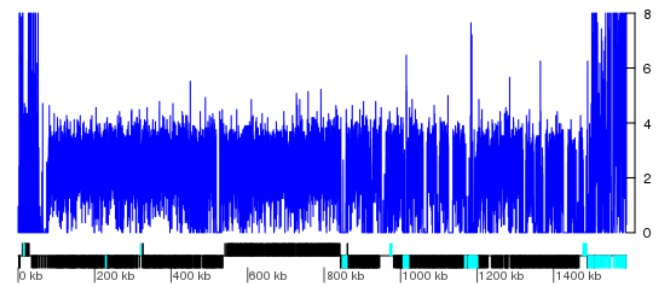

D7-Tb927.05\_v5.1

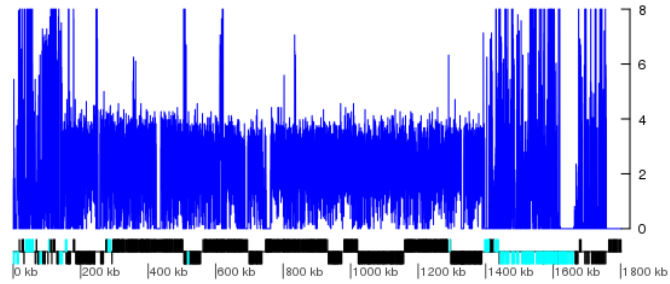

D7-Tb927.06\_v5.1

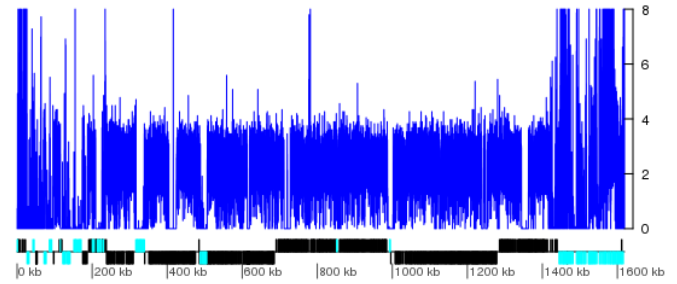

D7-Tb927.07\_v5.1

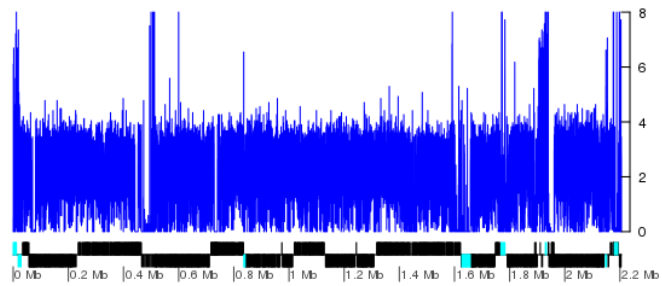

D7-Tb927.08\_v5.1

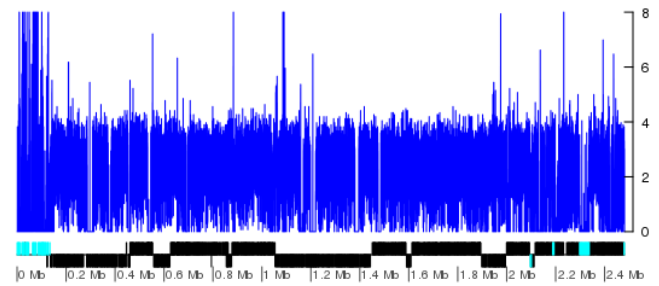

D7-Tb927.09\_v5.1

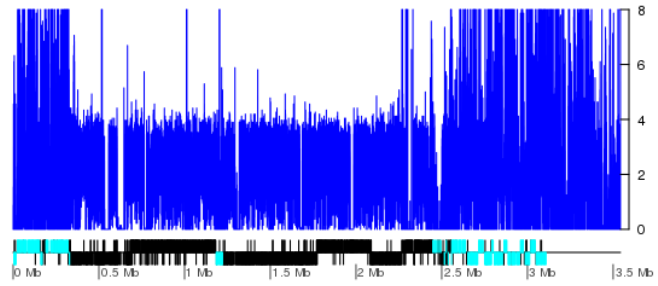

D7-Tb927.10\_v5.1

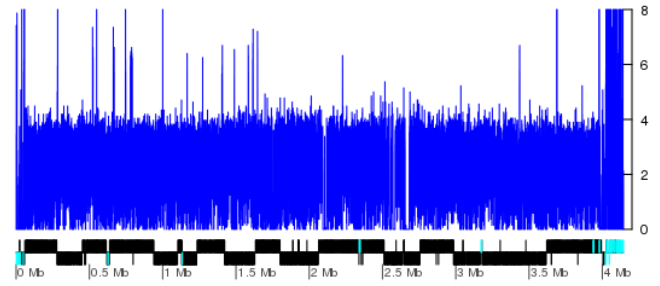

D7-Tb927.11\_v5.1

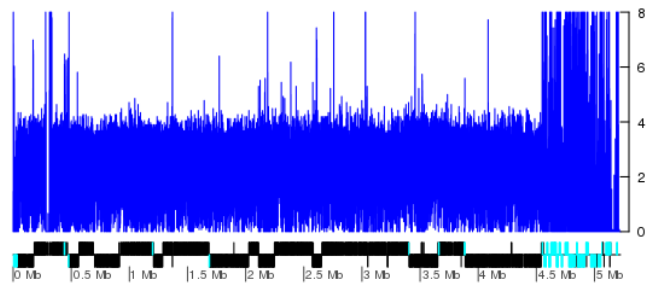

Isolate  
D11

D11-Tb927.01\_v5.1

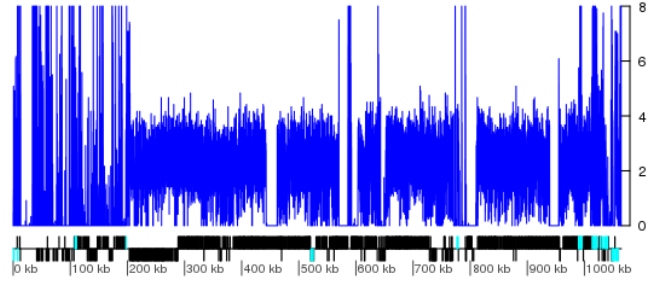

D11-Tb927.02\_v5.1

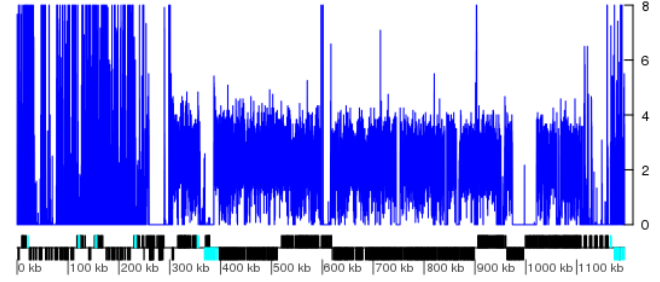

D11-Tb927.03\_v5.1

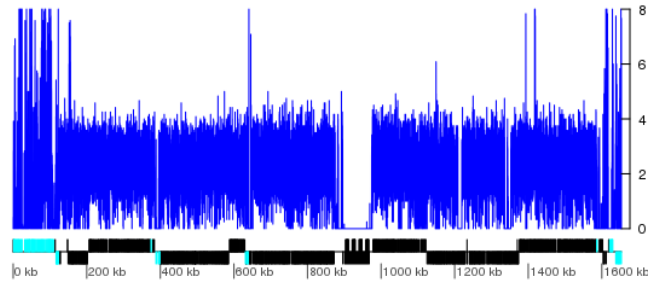

D11-Tb927.04\_v5.1

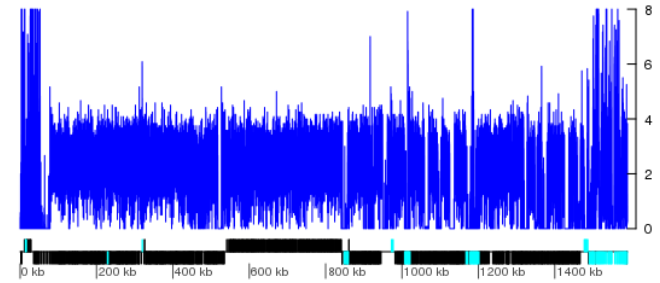



D11-Tb927.05\_v5.1

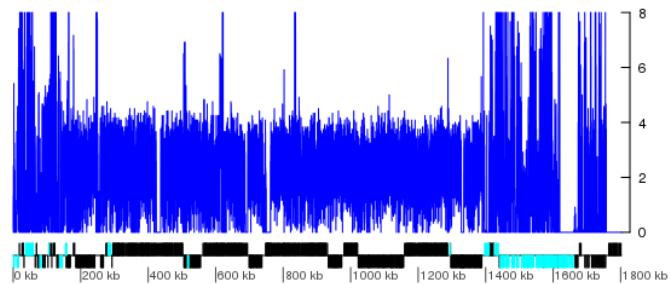

D11-Tb927.06\_v5.1

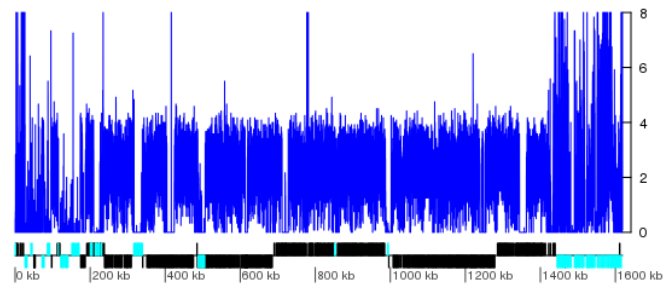

D11-Tb927.07\_v5.1

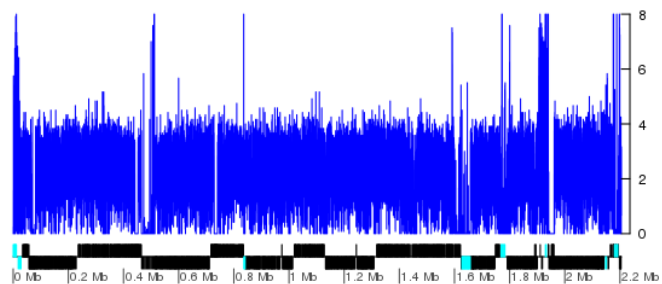

D11-Tb927.08\_v5.1

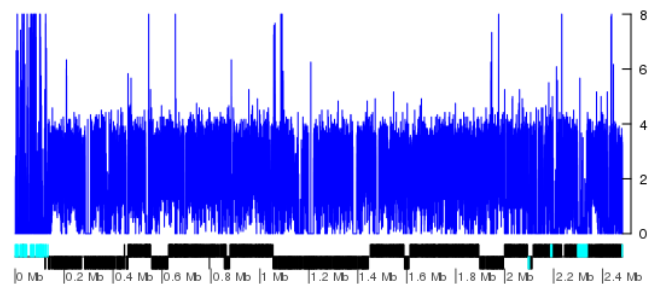

D11-Tb927.09\_v5.1

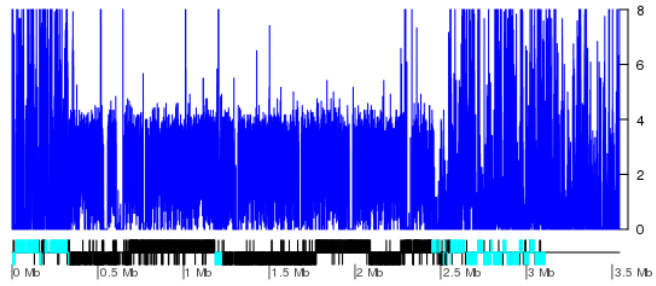

D11-Tb927.10\_v5.1

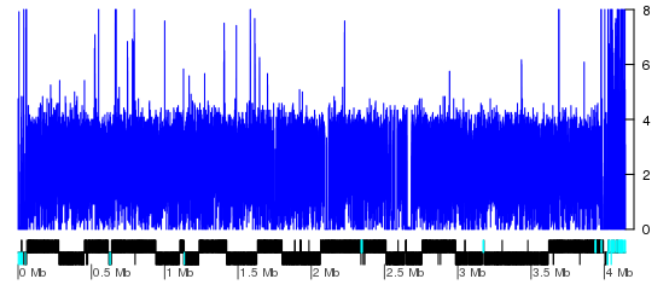

D11-Tb927.11\_v5.1

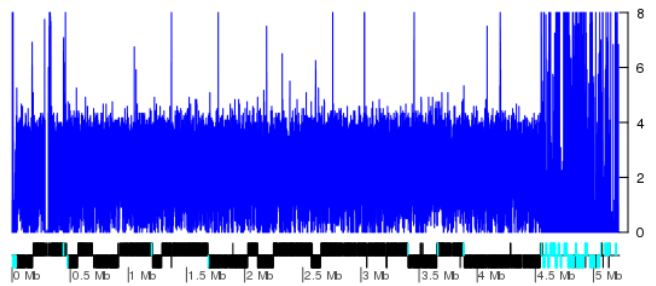

Isolate  
D16

D16-Tb927.01\_v5.1

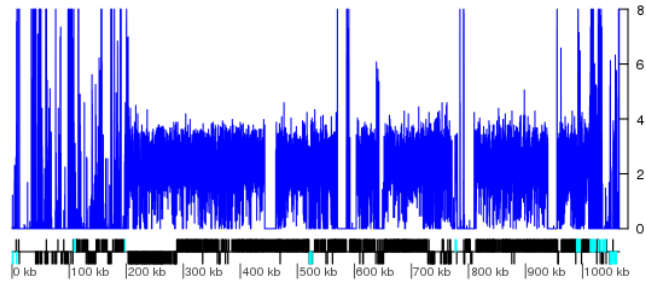

D16-Tb927.02\_v5.1

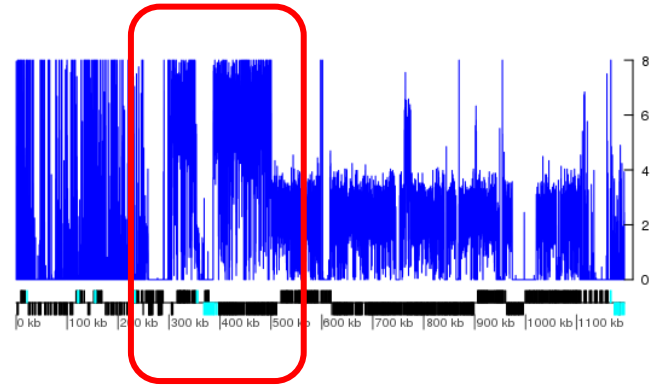

D16-Tb927.03\_v5.1

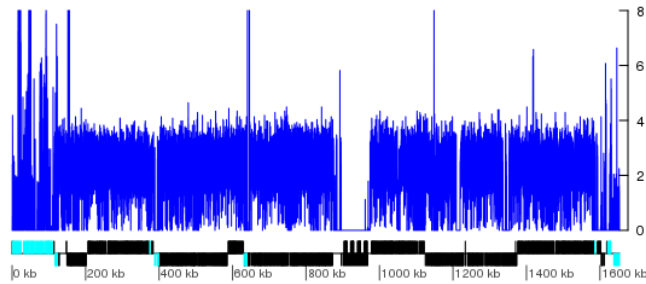

D16-Tb927.04\_v5.1

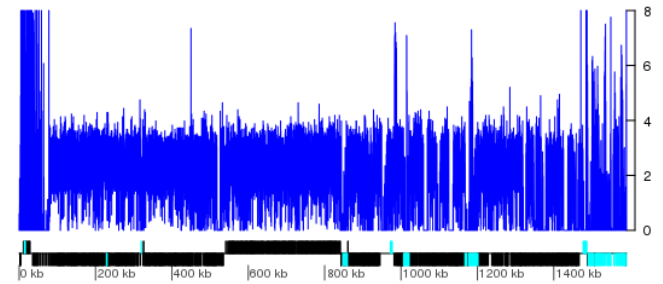

D16-Tb927.05\_v5.1

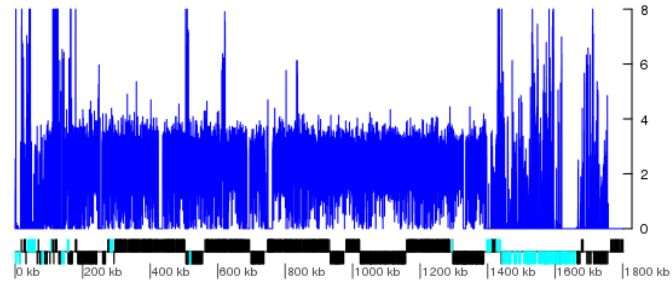

D16-Tb927.06\_v5.1

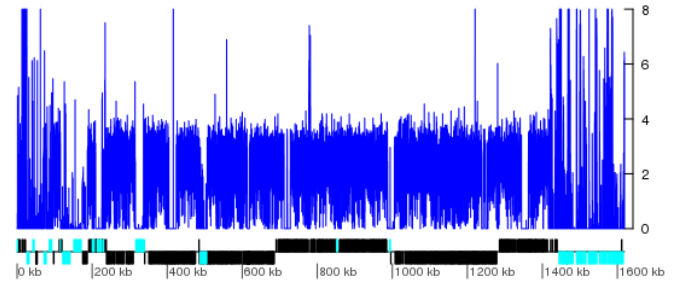

D16-Tb927.07\_v5.1

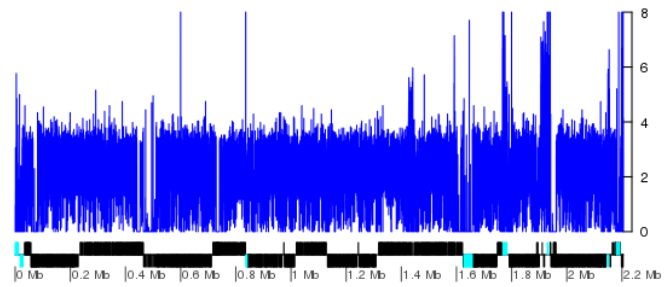

D16-Tb927.08\_v5.1

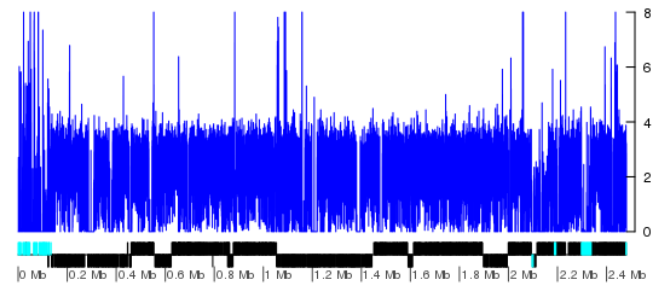

D16-Tb927.09\_v5.1

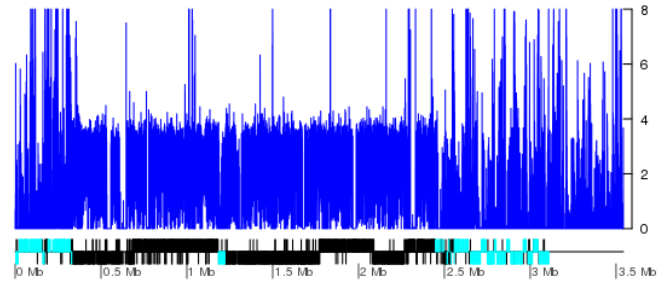

D16-Tb927.10\_v5.1

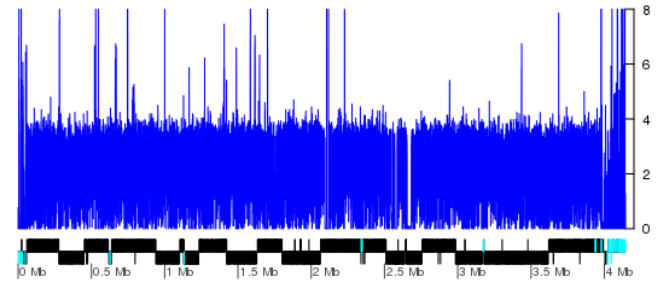

D16-Tb927.11\_v5.1

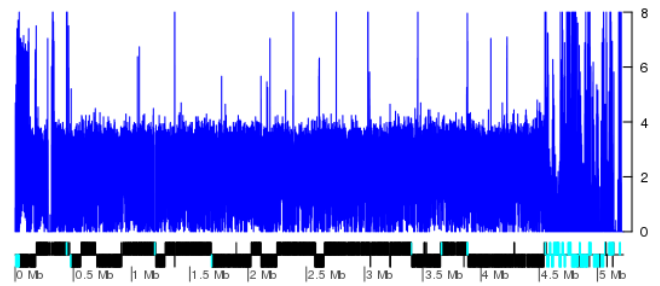

Isolate  
Dog157

Dog157-Tb927.01\_v5.1

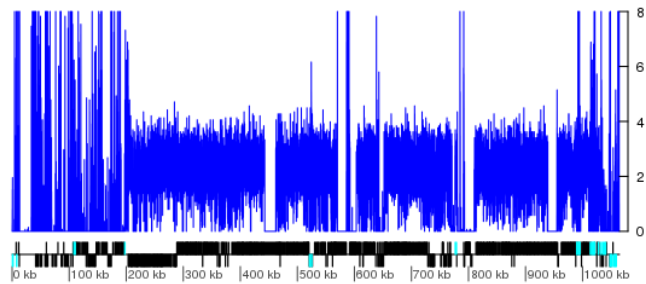

Dog157-Tb927.02\_v5.1

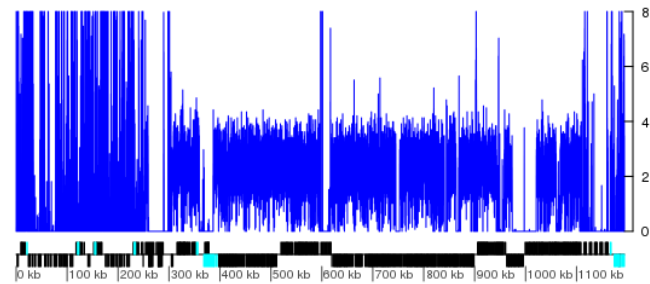

Dog157-Tb927.03\_v5.1

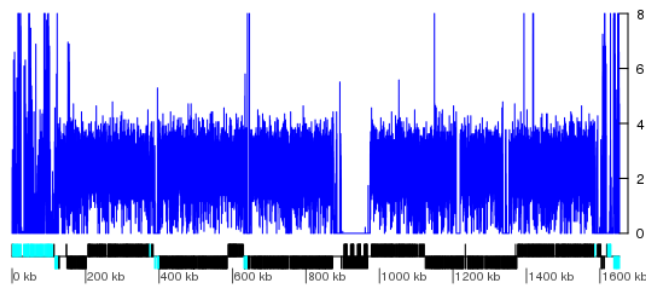

Dog157-Tb927.04\_v5.1

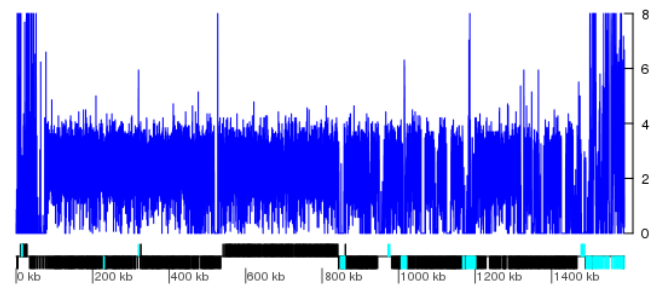



Dog157-Tb927.05\_v5.1

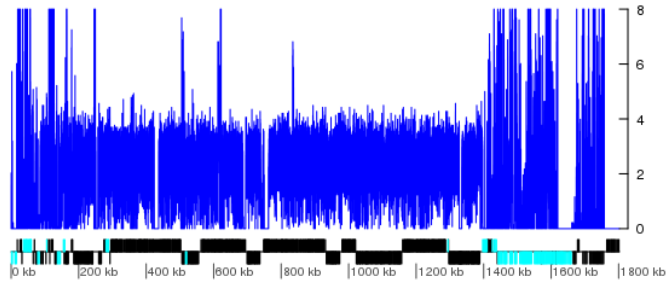

Dog157-Tb927.06\_v5.1

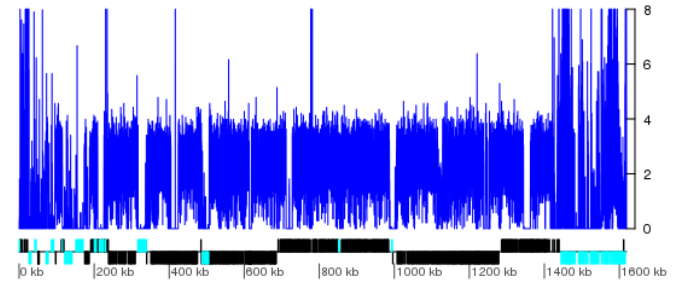

Dog157-Tb927.06\_v5.1

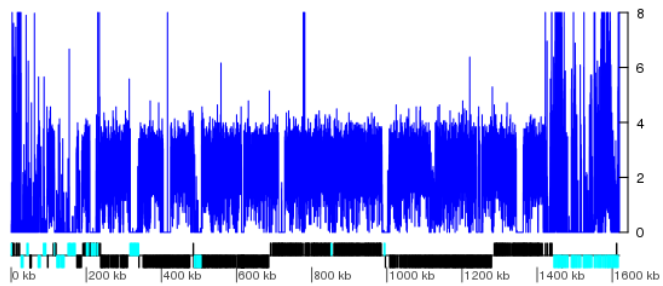

Dog157-Tb927.08\_v5.1

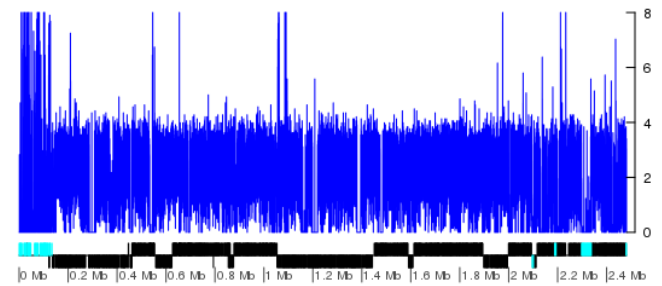

Dog157-Tb927.09\_v5.1

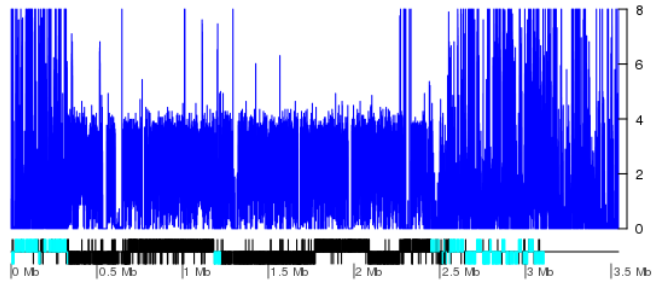

Dog157-Tb927.10\_v5.1

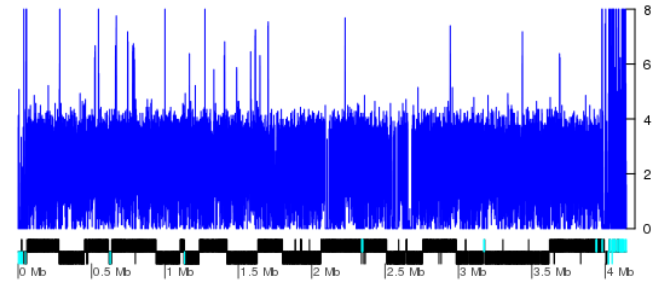

Dog157-Tb927.11\_v5.1

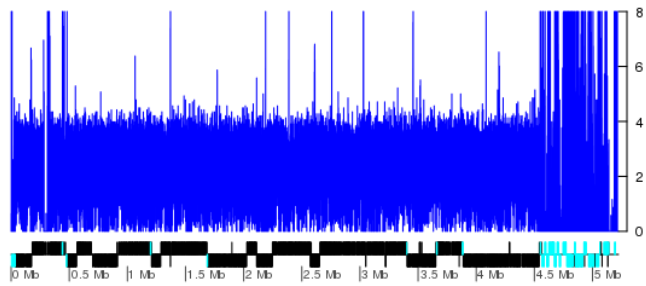

Isolate  
15

I5-Tb927.01\_v5.1

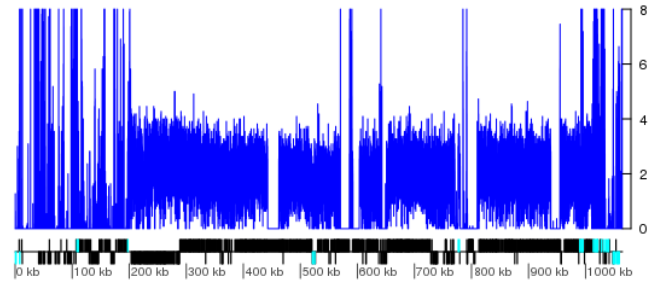

I5-Tb927.02\_v5.1

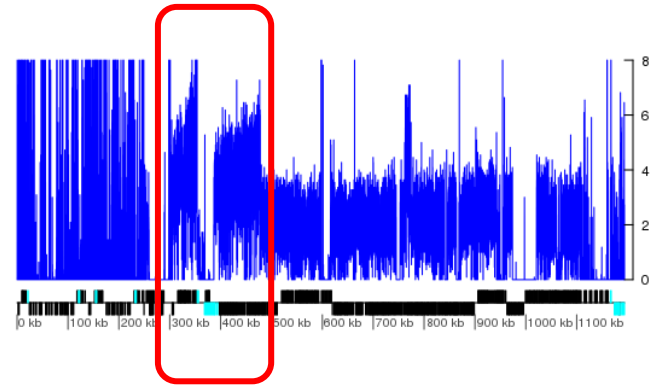

I5-Tb927.03\_v5.1

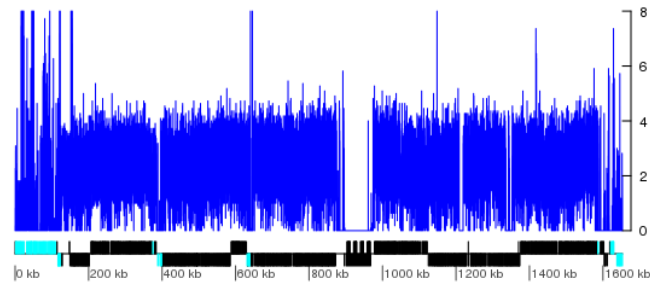

I5-Tb927.04\_v5.1

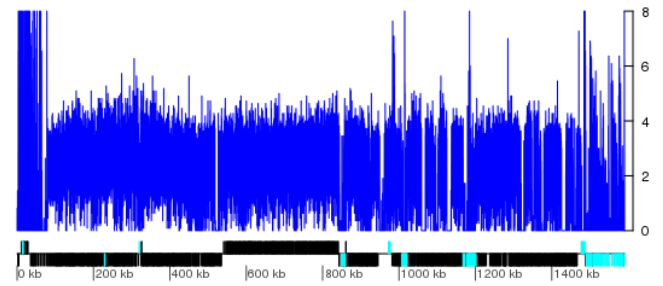

I5-Tb927.05\_v5.1

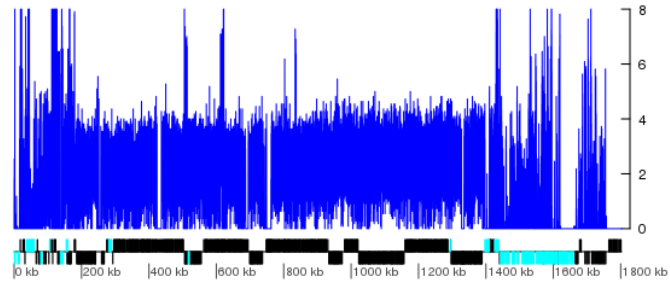

I5-Tb927.06\_v5.1

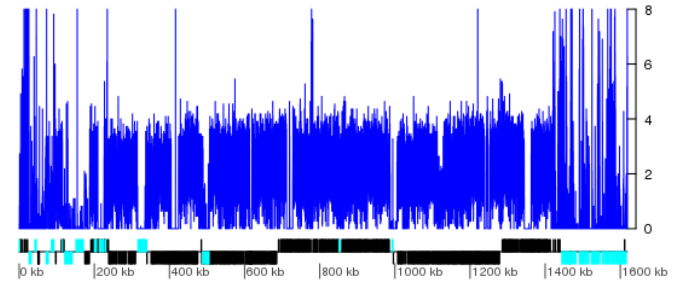

I5-Tb927.07\_v5.1

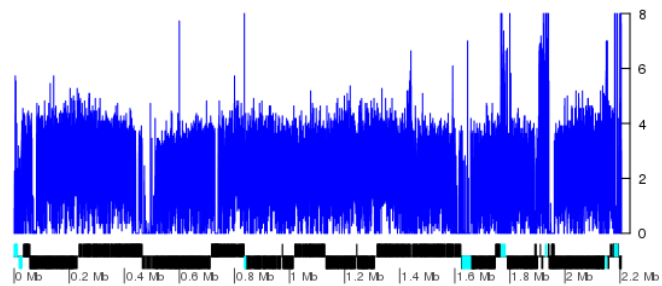

I5-Tb927.08\_v5.1

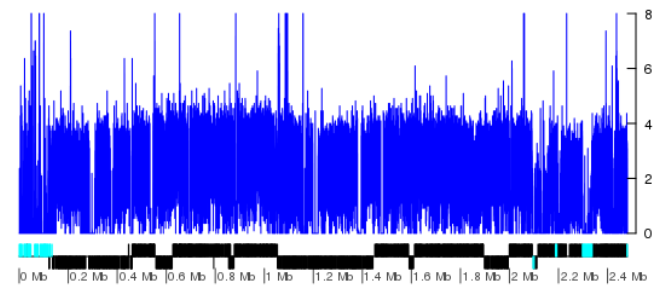

I5-Tb927.09\_v5.1

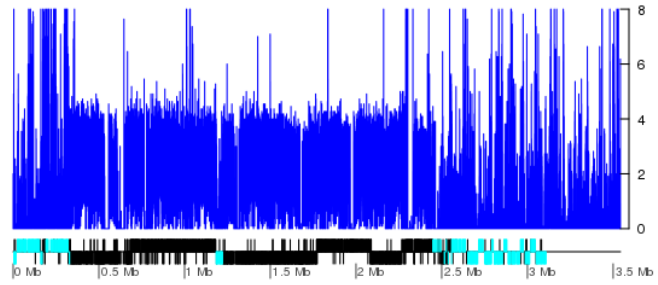

I5-Tb927.10\_v5.1

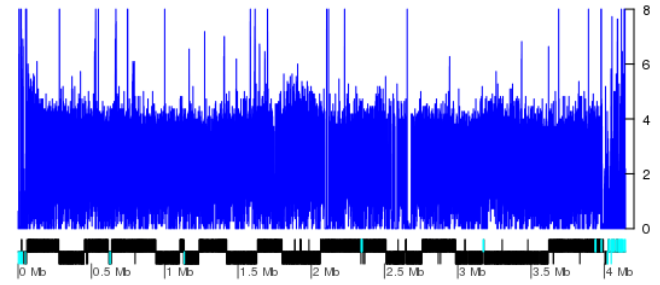

I5-Tb927.11\_v5.1

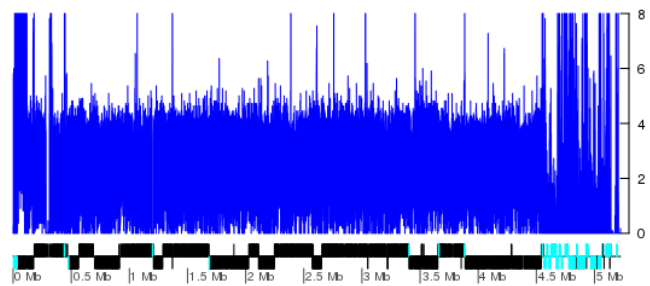

Isolate

17

I7-Tb927.01\_v5.1

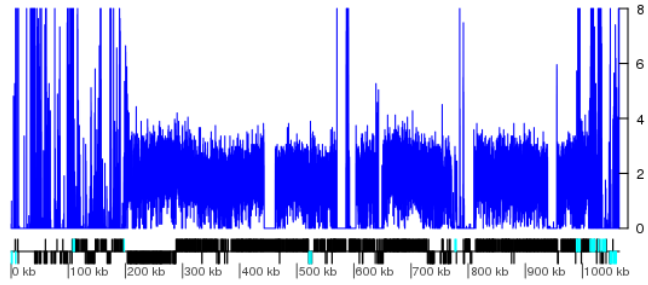

I7-Tb927.02\_v5.1

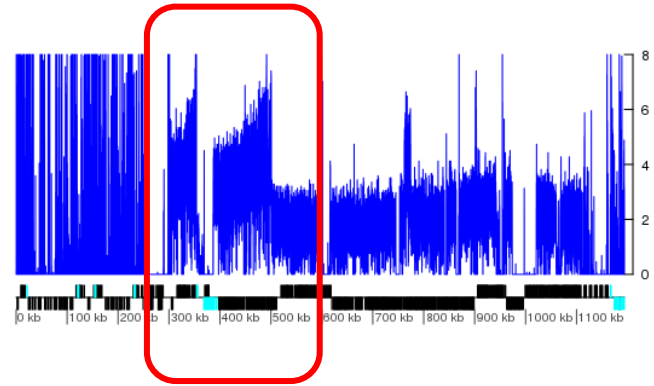

I7-Tb927.03\_v5.1

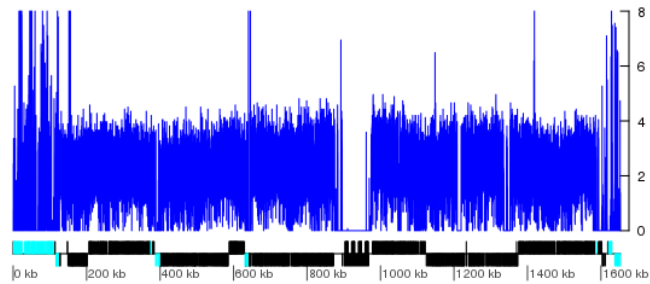

I7-Tb927.04\_v5.1

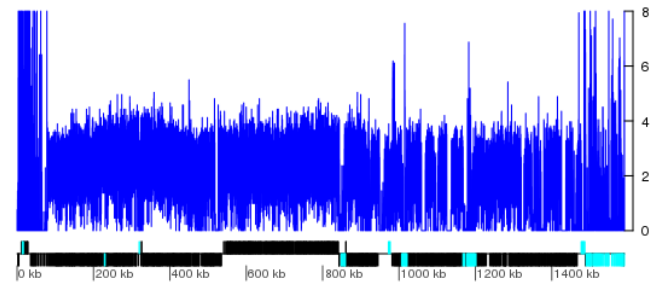



I7-Tb927.05\_v5.1

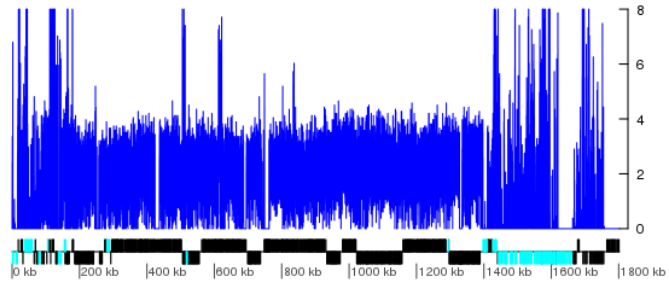

I7-Tb927.06\_v5.1

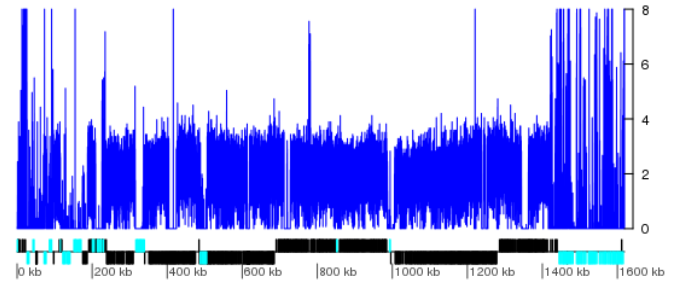

I7-Tb927.07\_v5.1

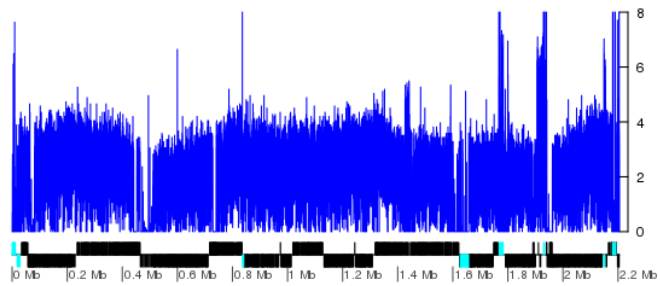

I7-Tb927.08\_v5.1

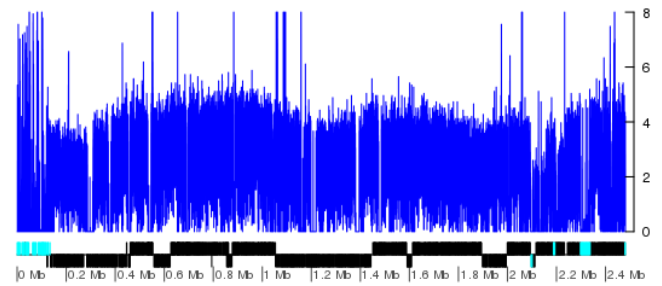

I7-Tb927.09\_v5.1

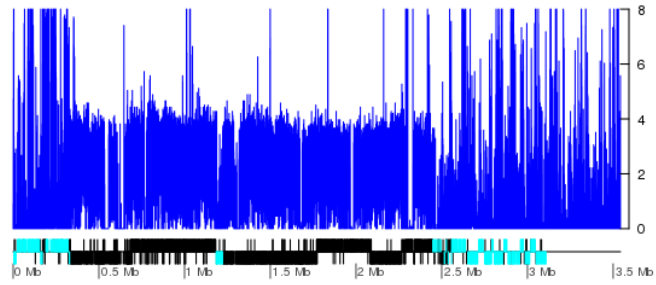

I7-Tb927.10\_v5.1

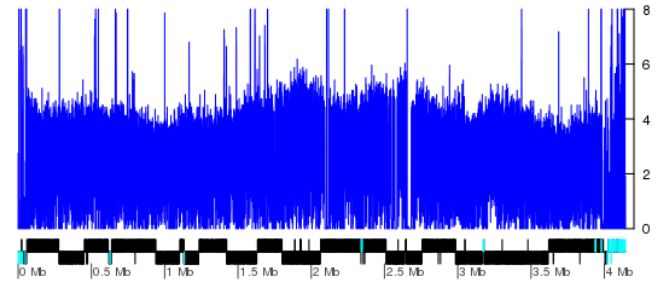

I7-Tb927.11\_v5.1

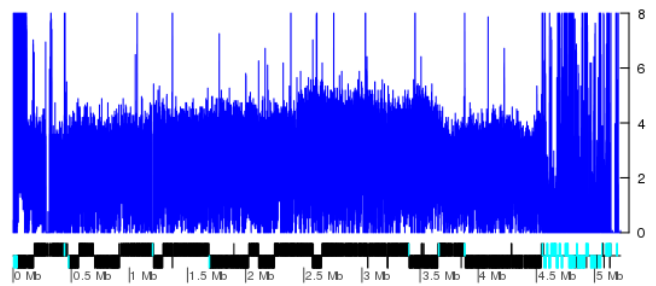

Isolate  
Keko

KeKo-Tb927.01\_v5.1

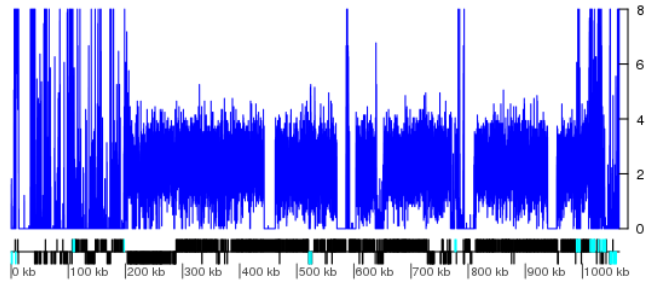

KeKo-Tb927.02\_v5.1

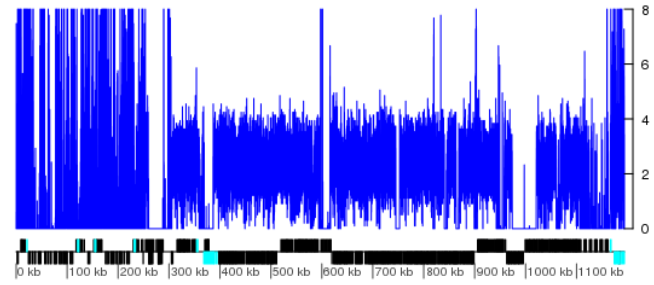

KeKo-Tb927.03\_v5.1

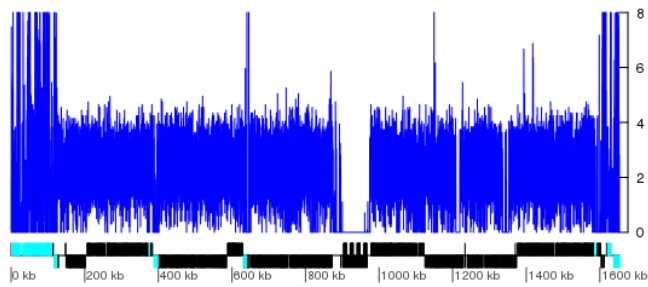

KeKo-Tb927.04\_v5.1

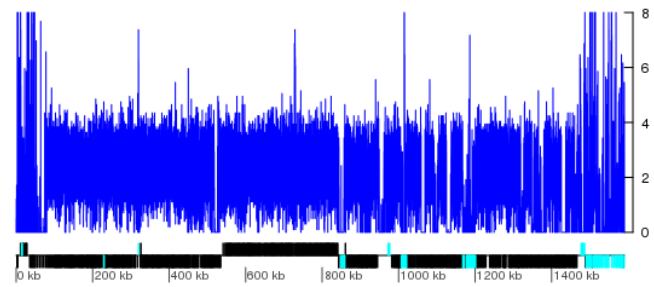

KeKo-Tb927.05\_v5.1

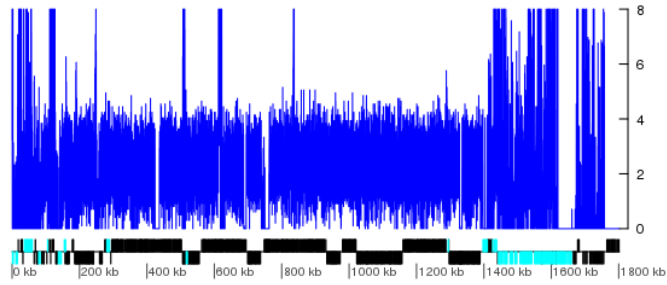

KeKo-Tb927.06\_v5.1

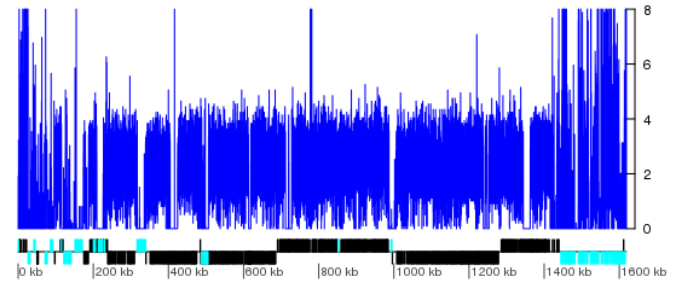

KeKo-Tb927.07\_v5.1

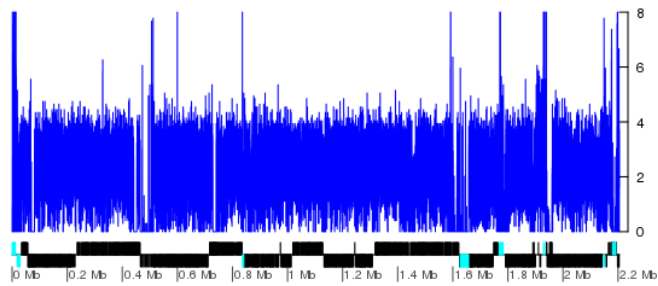

KeKo-Tb927.08\_v5.1

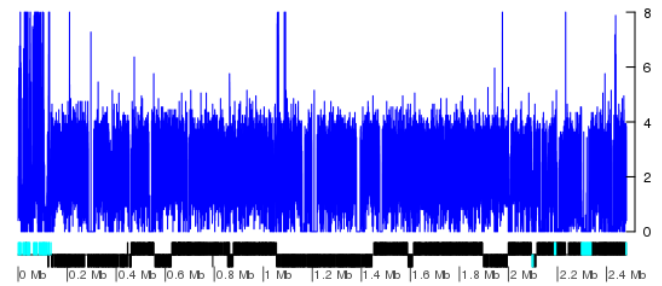

KeKo-Tb927.09\_v5.1

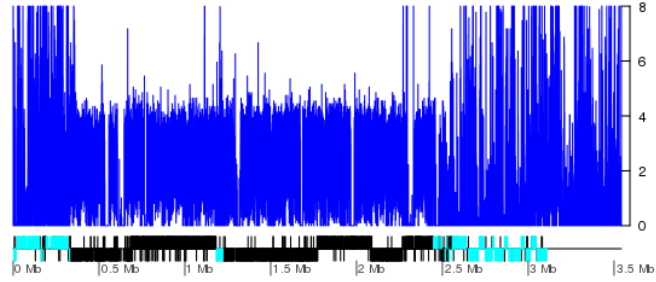

KeKo-Tb927.10\_v5.1

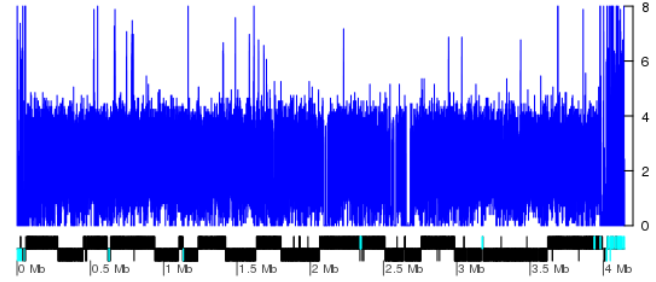

KeKo-Tb927.11\_v5.1

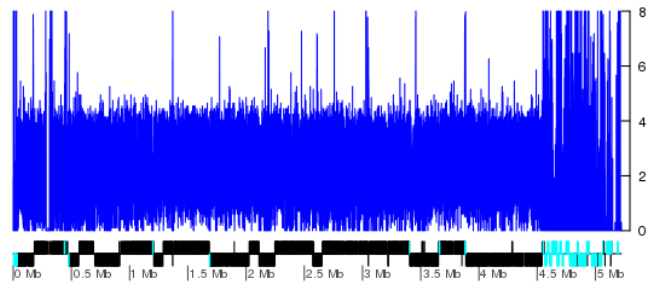

Isolate  
LW007A

LWO07A-Tb927.01\_v5.1

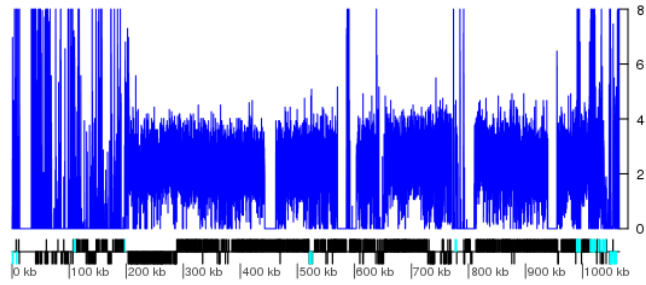

LWO07A-Tb927.02\_v5.1

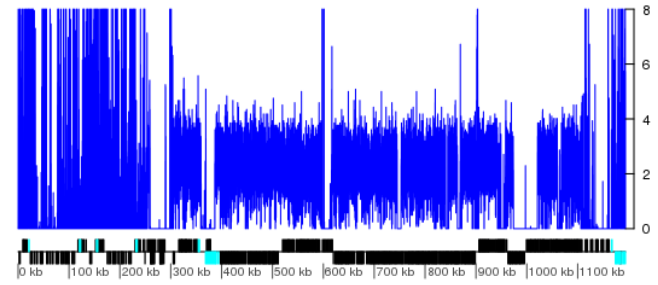

LWO07A-Tb927.03\_v5.1

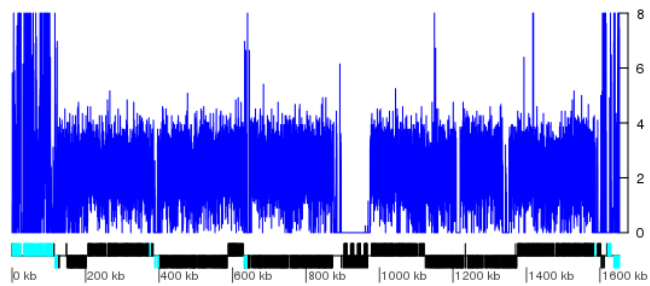

LWO07A-Tb927.04\_v5.1

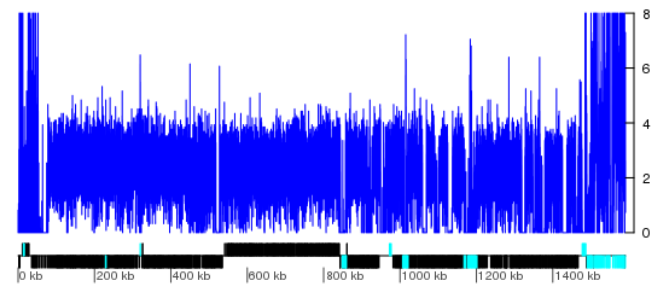



LWO07A-Tb927.05\_v5.1

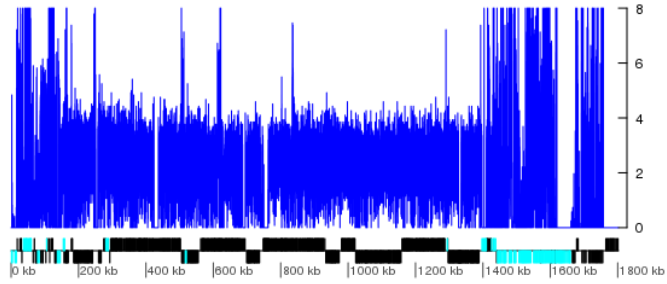

LWO07A-Tb927.06\_v5.1

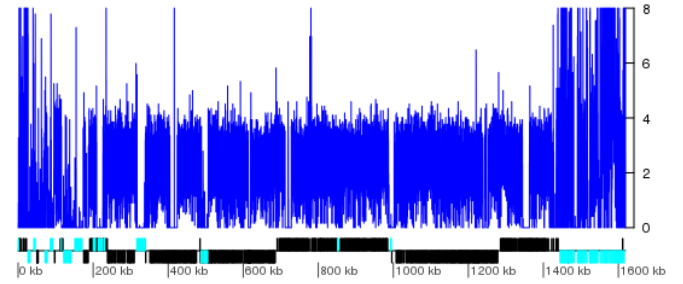

LWO07A-Tb927.07\_v5.1

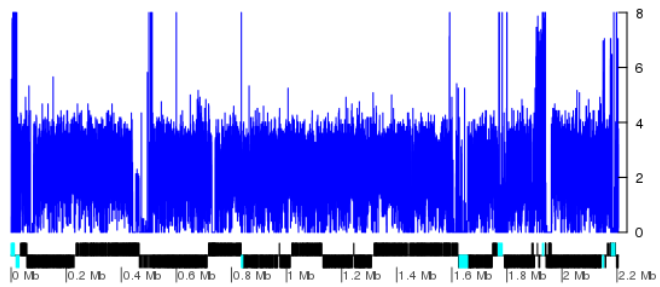

LWO07A-Tb927.08\_v5.1

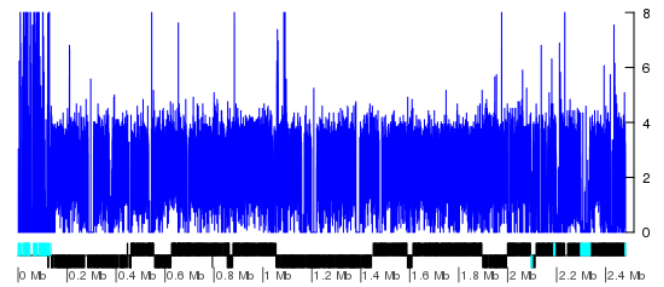

LWO07A-Tb927.09\_v5.1

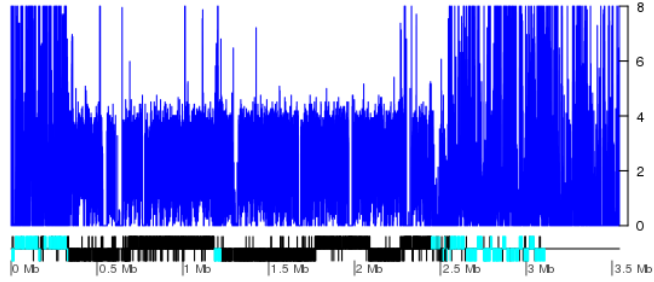

LWO07A-Tb927.10\_v5.1

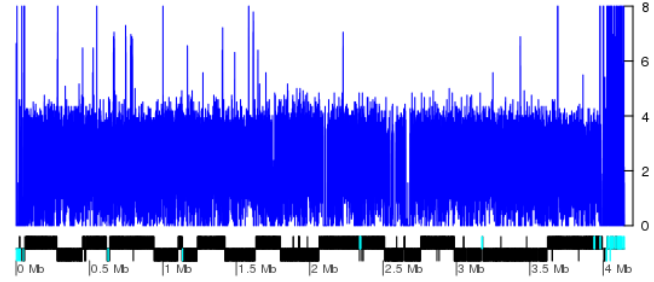

LWO07A-Tb927.11\_v5.1

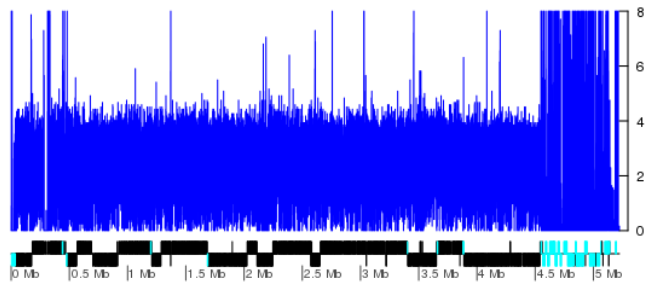

Isolate  
LWO011A

LWO11A-Tb927.01\_v5.1

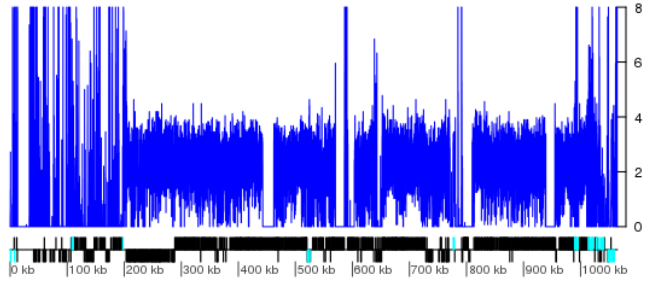

LWO11A-Tb927.02\_v5.1

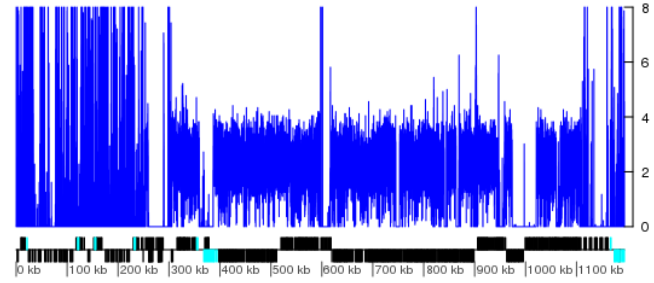

LWO11A-Tb927.03\_v5.1

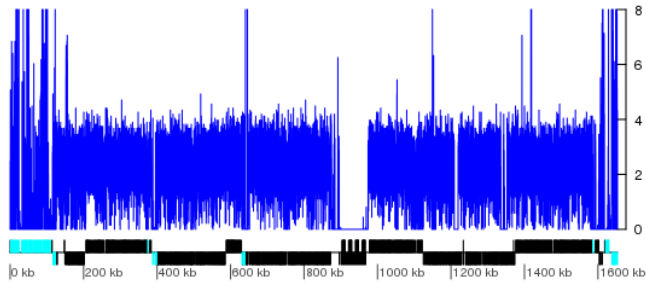

LWO11A-Tb927.04\_v5.1

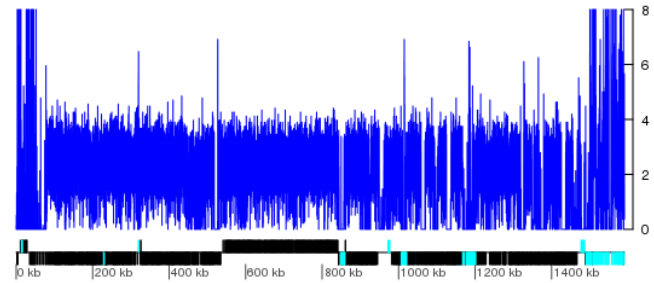

LWO11A-Tb927.05\_v5.1

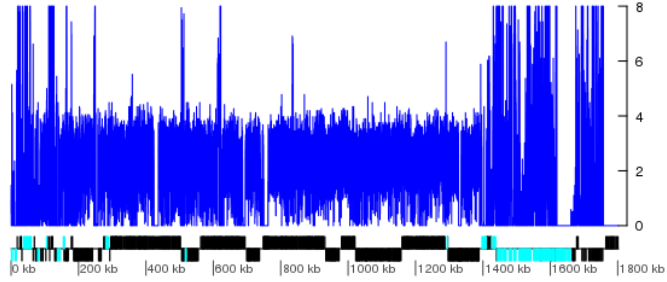

LWO11A-Tb927.06\_v5.1

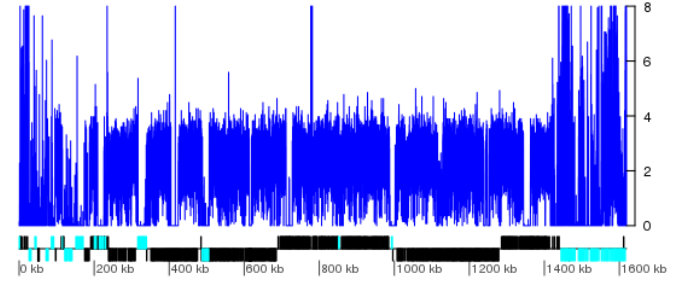

LWO11A-Tb927.07\_v5.1

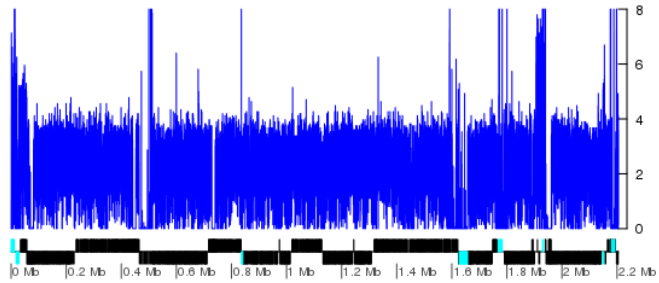

LWO11A-Tb927.08\_v5.1

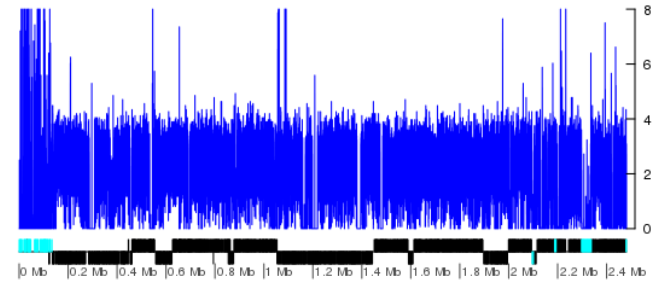

LWO11A-Tb927.09\_v5.1

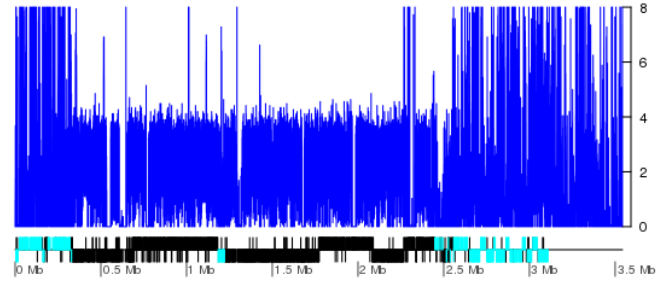

LWO11A-Tb927.10\_v5.1

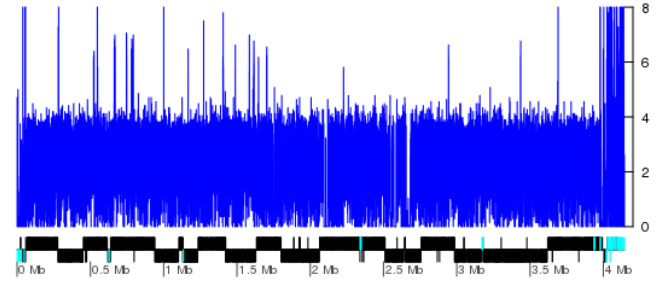

LWO11A-Tb927.11\_v5.1

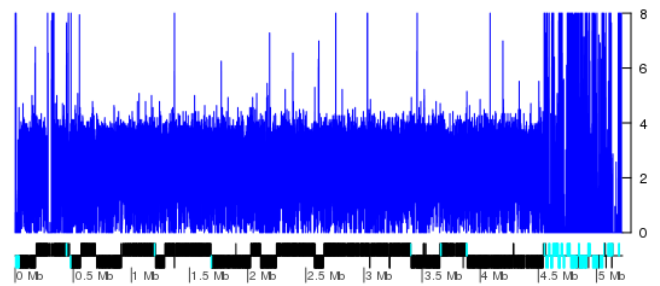

Isolate  
LW0024A

LWO11A-Tb927.01\_v5.1

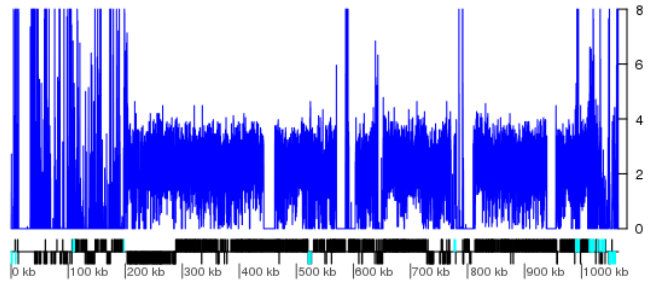

LWO11A-Tb927.02\_v5.1

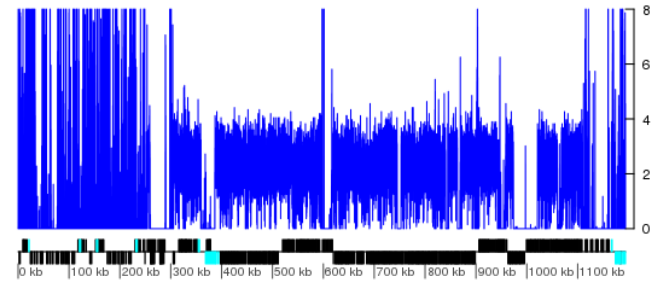

LWO11A-Tb927.03\_v5.1

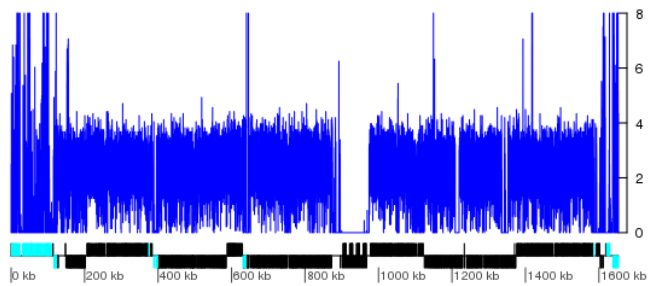

LWO11A-Tb927.04\_v5.1

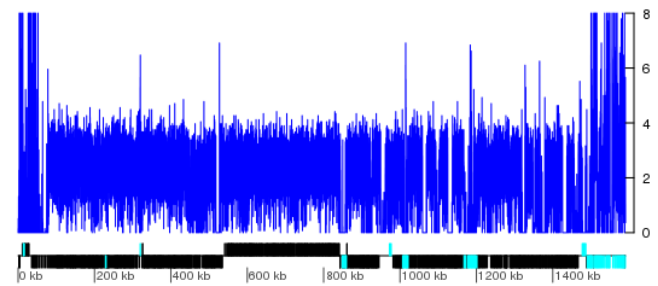



LWO11A-Tb927.05\_v5.1

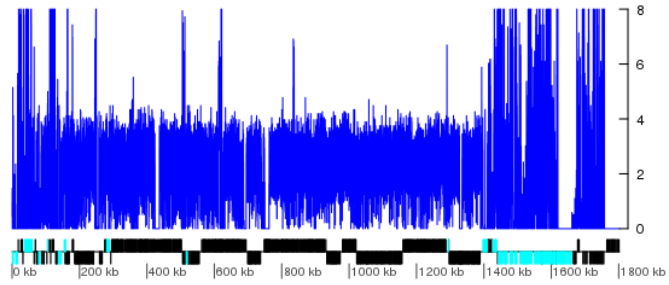

LWO11A-Tb927.06\_v5.1

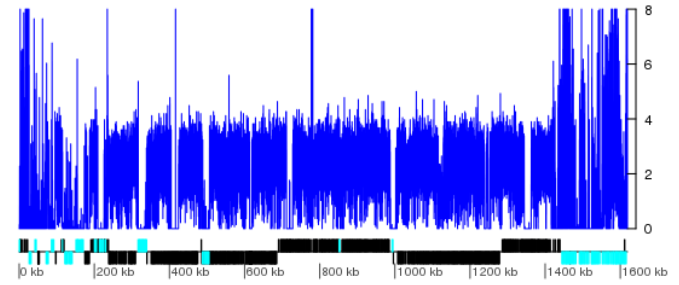

LWO11A-Tb927.07\_v5.1

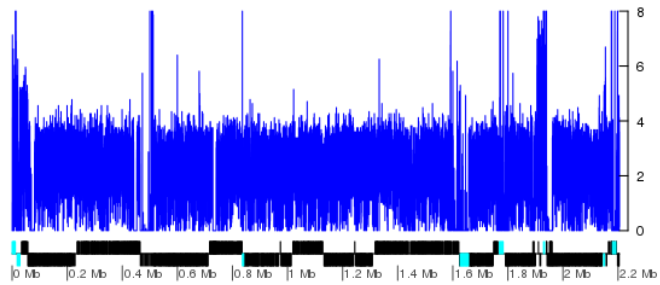

LWO11A-Tb927.08\_v5.1

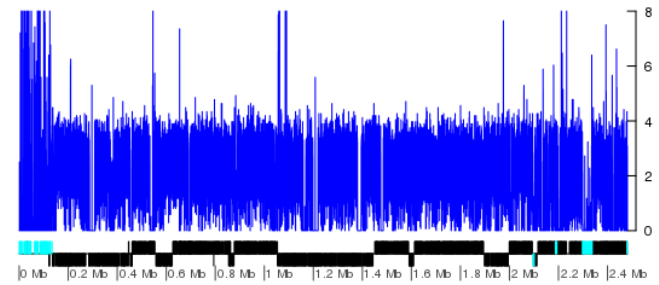

LWO11A-Tb927.09\_v5.1

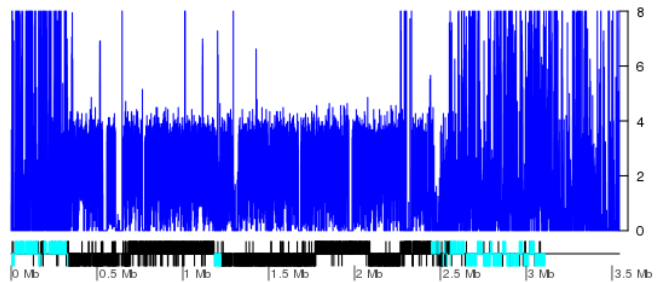

LWO11A-Tb927.10\_v5.1

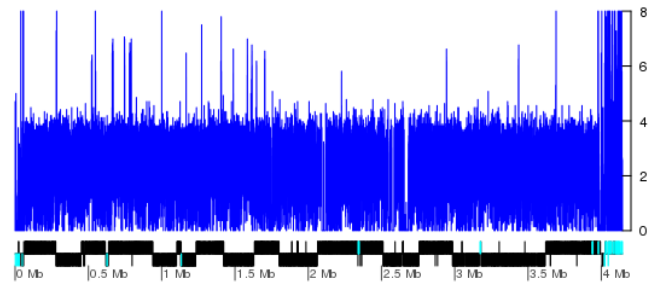

LWO11A-Tb927.11\_v5.1

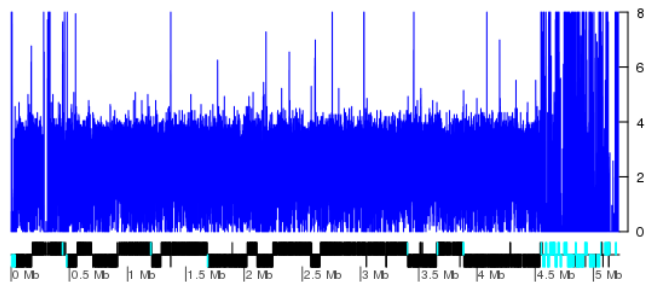

Isolate  
LW0030A

LWO30A-Tb927.01\_v5.1

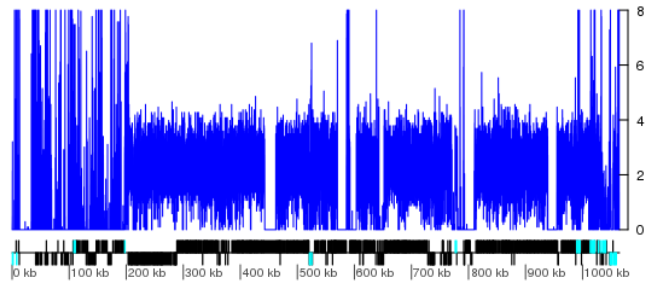

LWO30A-Tb927.02\_v5.1

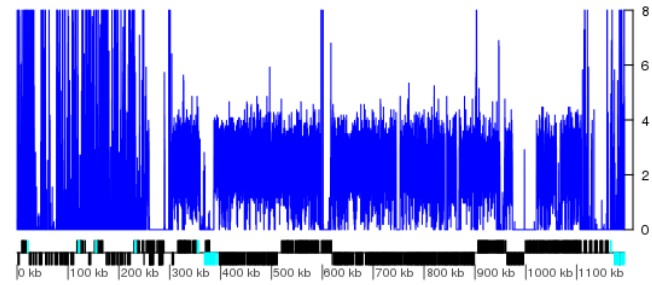

LWO30A-Tb927.03\_v5.1

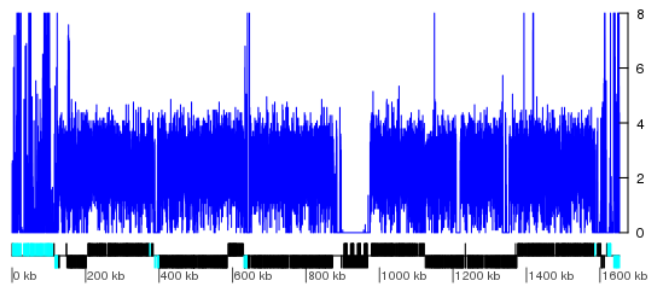

LWO30A-Tb927.04\_v5.1

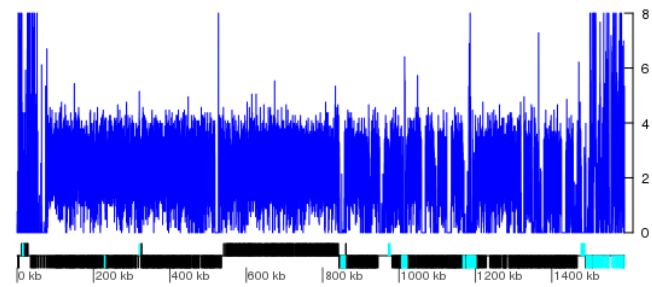

LWO30A-Tb927.05\_v5.1

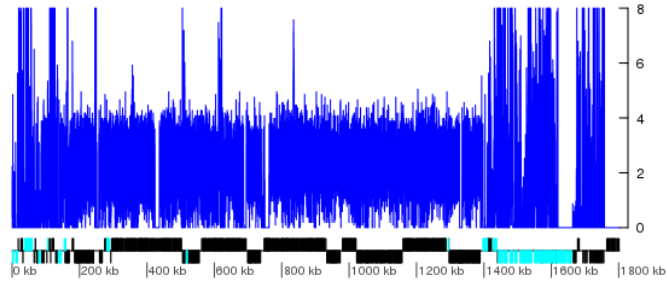

LWO30A-Tb927.06\_v5.1

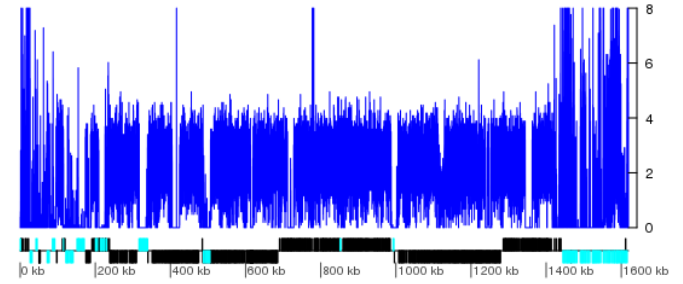

LWO30A-Tb927.07\_v5.1

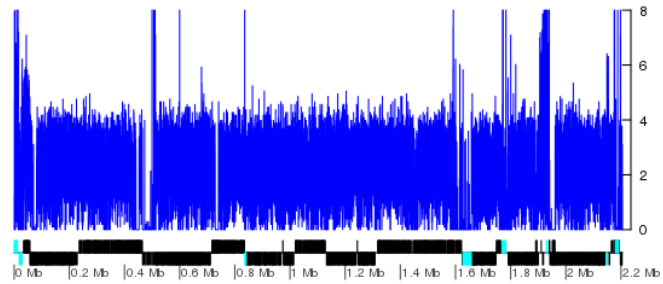

LWO30A-Tb927.08\_v5.1

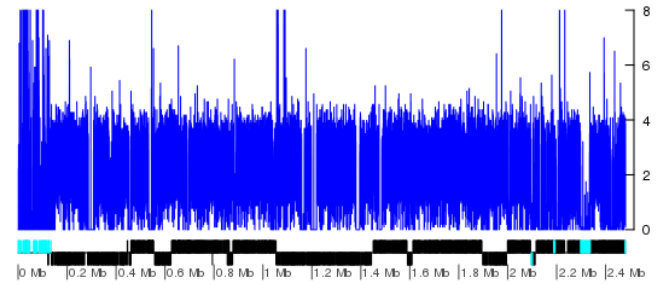

LWO30A-Tb927.09\_v5.1

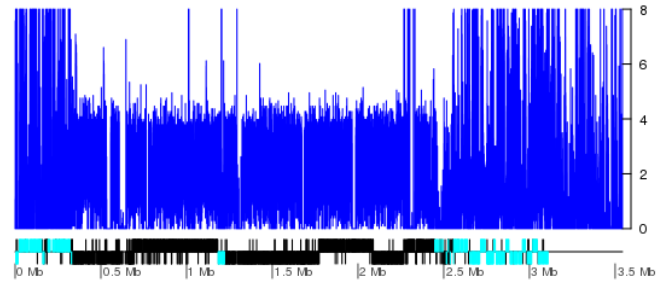

LWO30A-Tb927.10\_v5.1

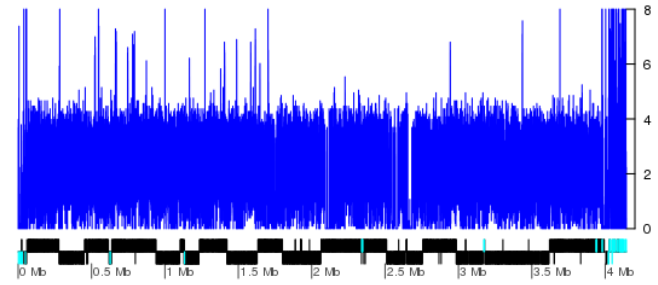

LWO30A-Tb927.11\_v5.1

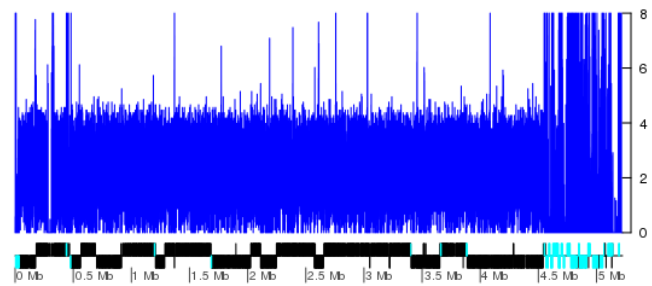

Isolate  
LWO0150A

LWO150A-Tb927.01\_v5.1

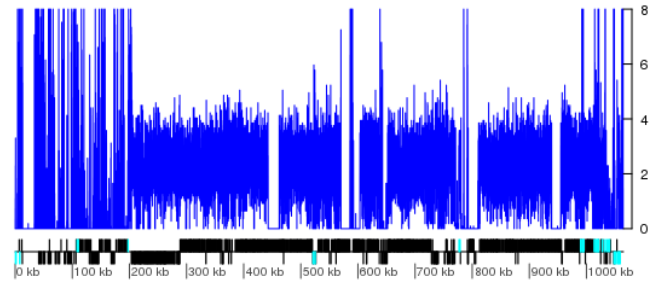

LWO150A-Tb927.02\_v5.1

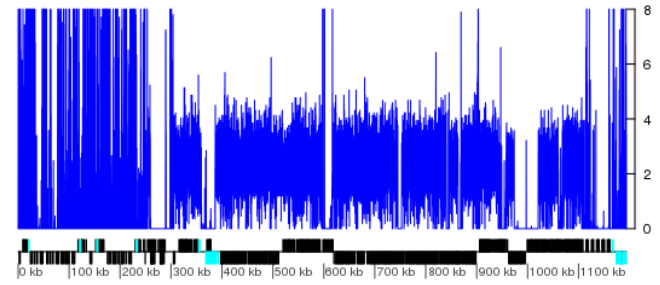

LWO150A-Tb927.03\_v5.1

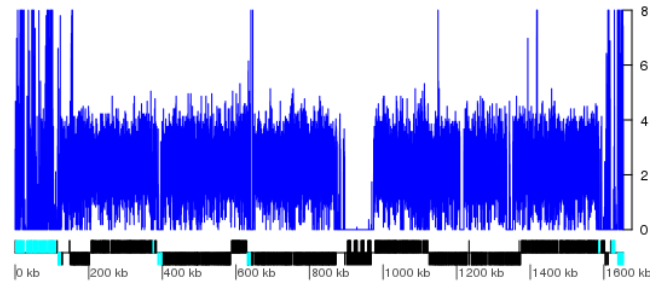

LWO150A-Tb927.04\_v5.1

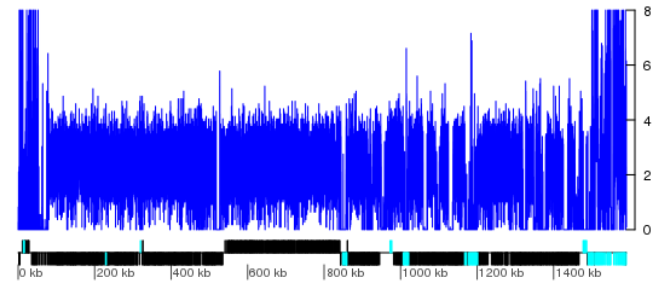



LWO150A-Tb927.05\_v5.1

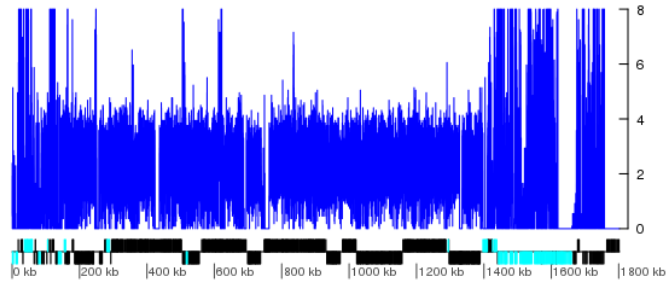

LWO150A-Tb927.06\_v5.1

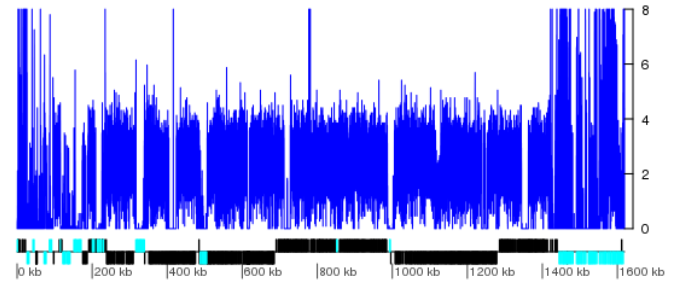

LWO150A-Tb927.07\_v5.1

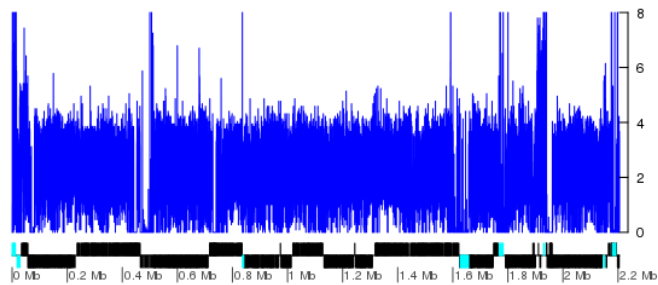

LWO150A-Tb927.08\_v5.1

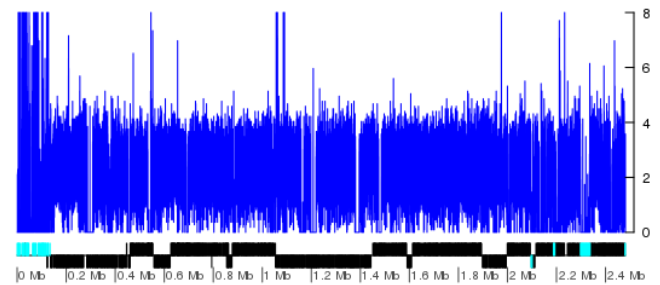

LWO150A-Tb927.09\_v5.1

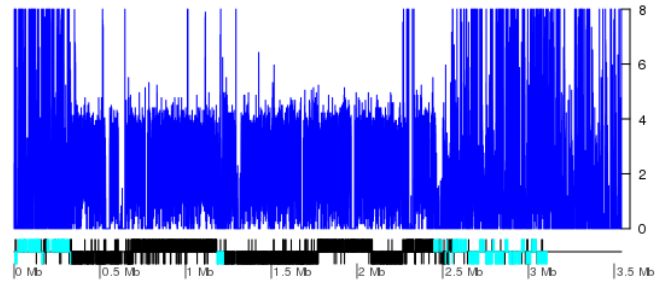

LWO150A-Tb927.10\_v5.1

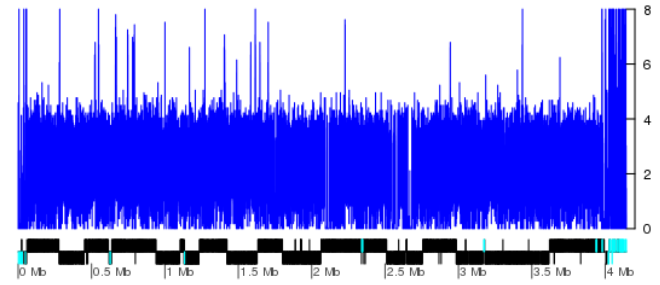

LWO150A-Tb927.11\_v5.1

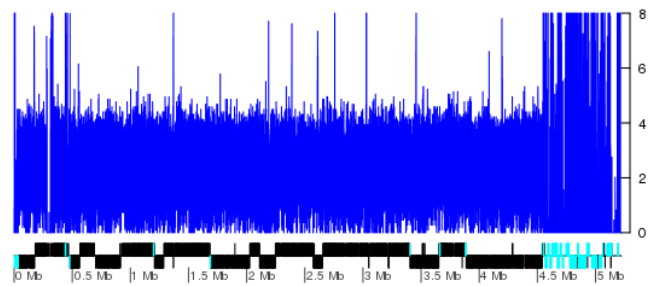

Isolate  
Okware

Okware-Tb927.01\_v5.1

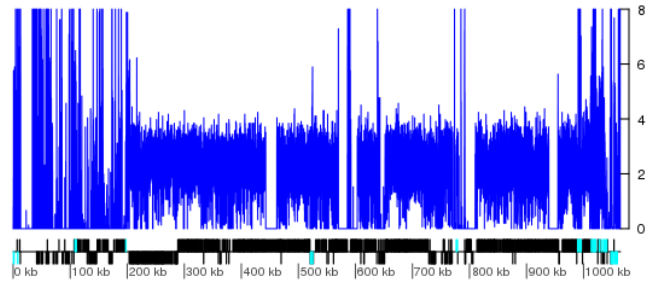

Okware-Tb927.02\_v5.1

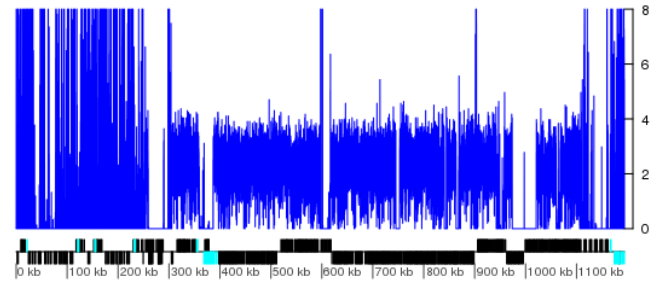

Okware-Tb927.03\_v5.1

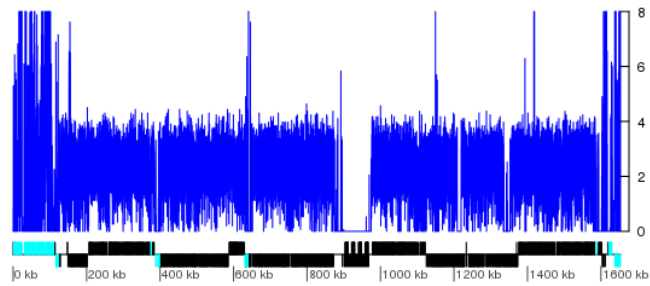

Okware-Tb927.04\_v5.1

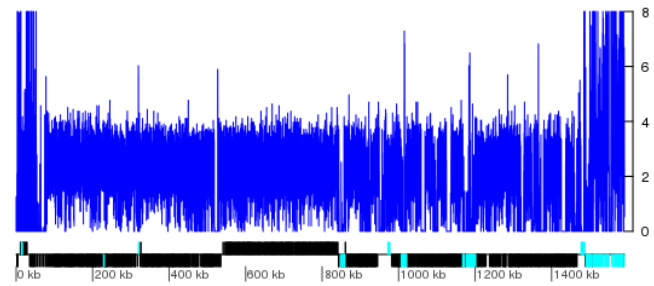

Okware-Tb927.05\_v5.1

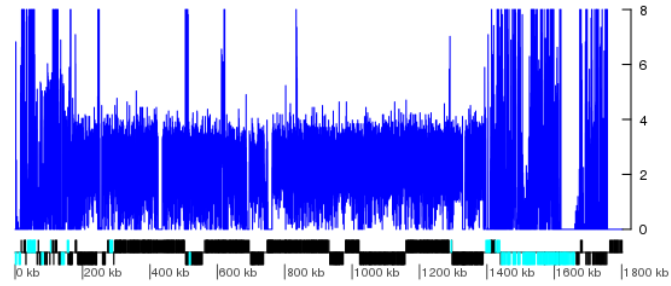

Okware-Tb927.06\_v5.1

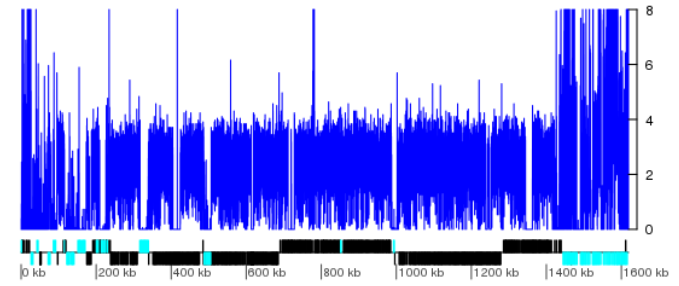

Okware-Tb927.07\_v5.1

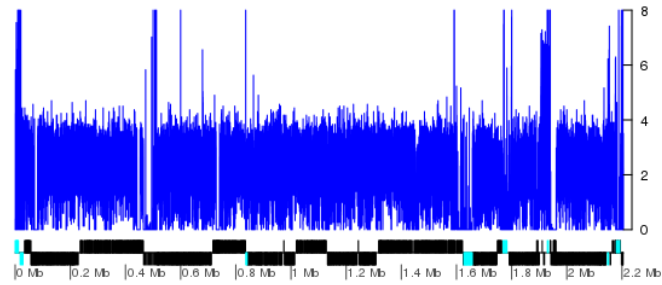

Okware-Tb927.08\_v5.1

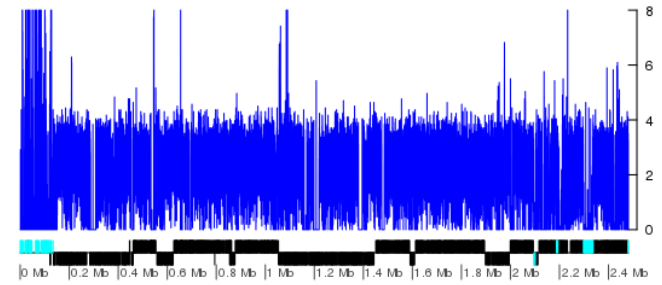

Okware-Tb927.09\_v5.1

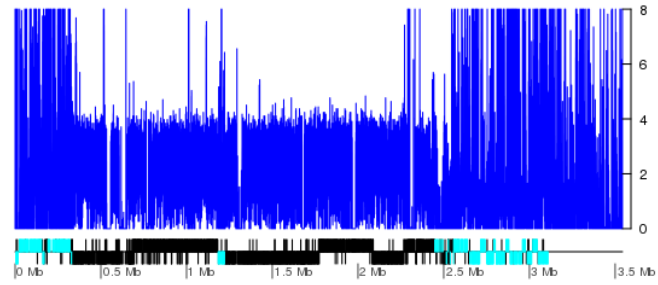

Okware-Tb927.10\_v5.1

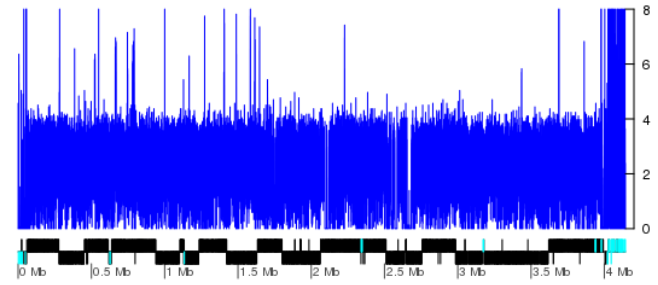

Okware-Tb927.11\_v5.1

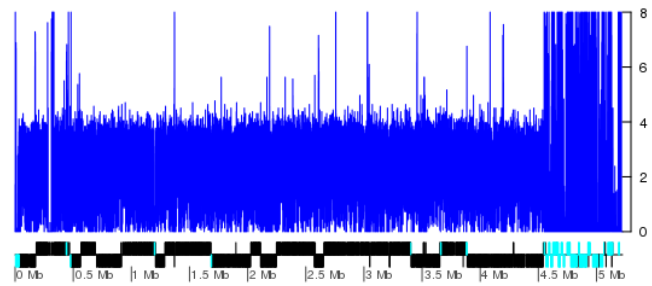

Isolate

**STIB348TBABB**

STIB348TBABB-Tb927.01\_v5.1

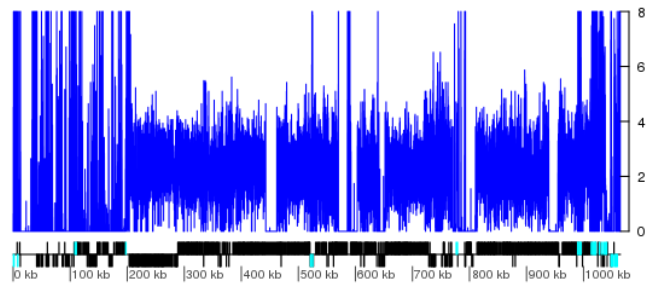

STIB348TBABB-Tb927.02\_v5.1

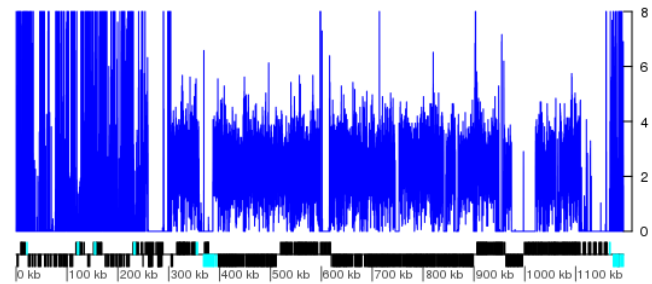

STIB348TBABB-Tb927.03\_v5.1

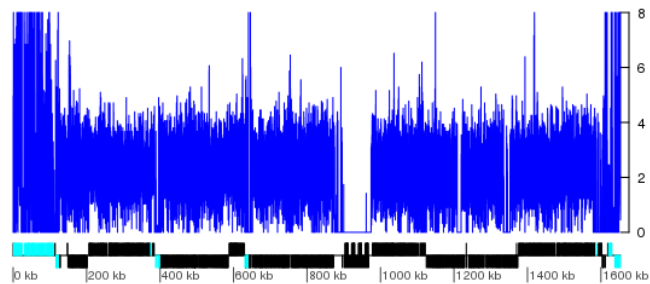

STIB348TBABB-Tb927.04\_v5.1

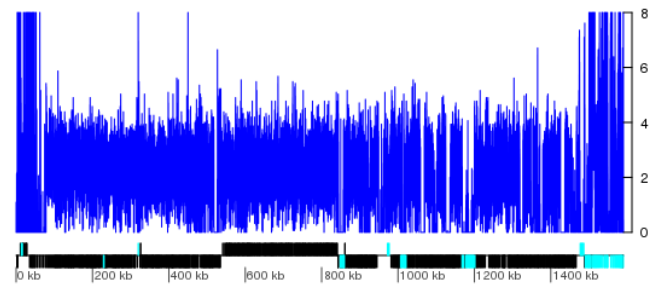



STIB348TBABB-Tb927.05\_v5.1

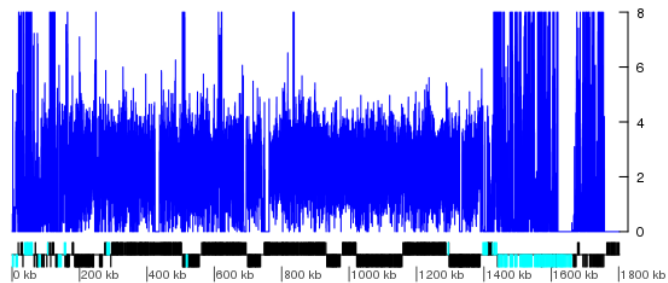

STIB348TBABB-Tb927.06\_v5.1

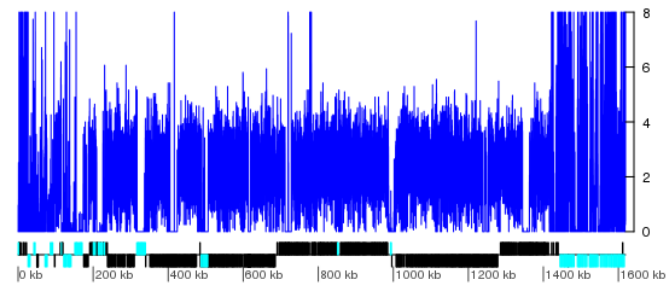

STIB348TBABB-Tb927.07\_v5.1

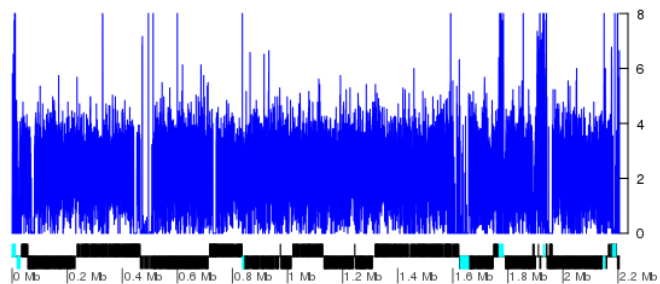

STIB348TBABB-Tb927.08\_v5.1

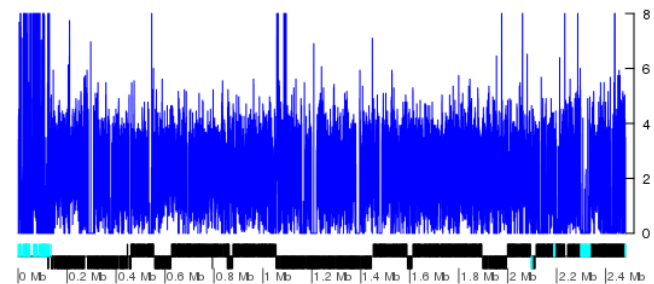

STIB348TBABB-Tb927.09\_v5.1

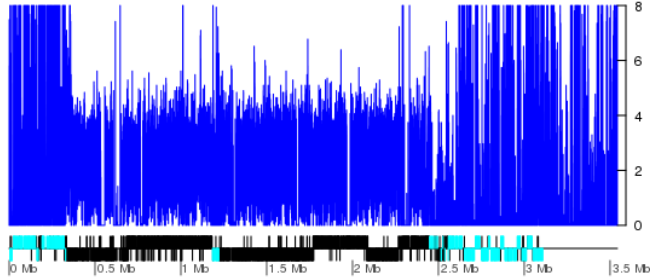

STIB348TBABB-Tb927.10\_v5.1

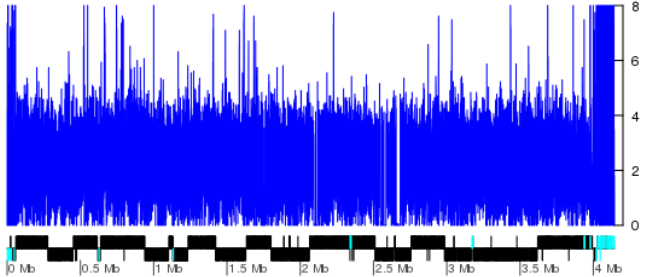

STIB348TBABB-Tb927.10\_v5.1

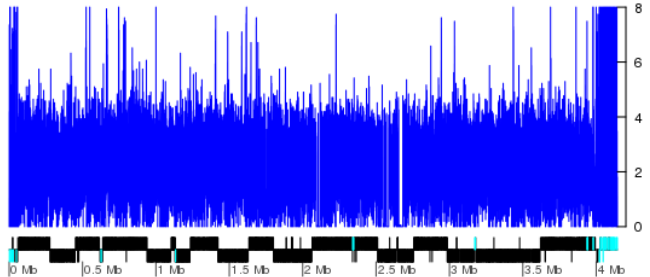

Isolate  
STIB704C

STIB704C-Tb927.01\_v5.1

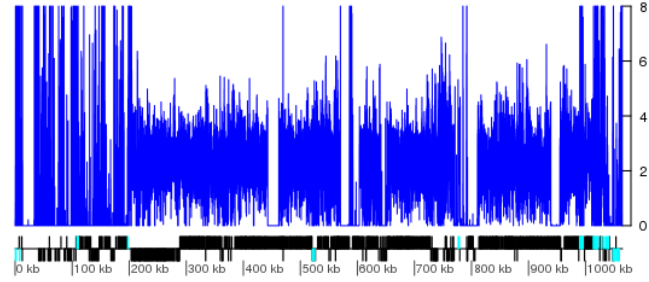

STIB704C-Tb927.02\_v5.1

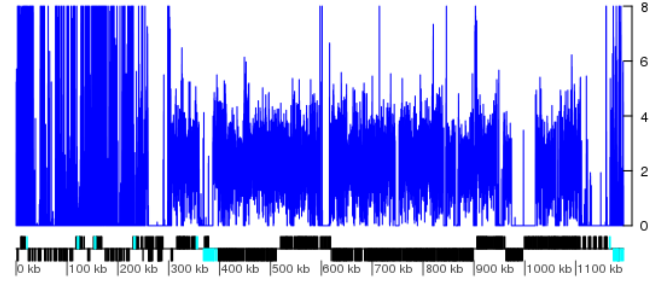

STIB704C-Tb927.03\_v5.1

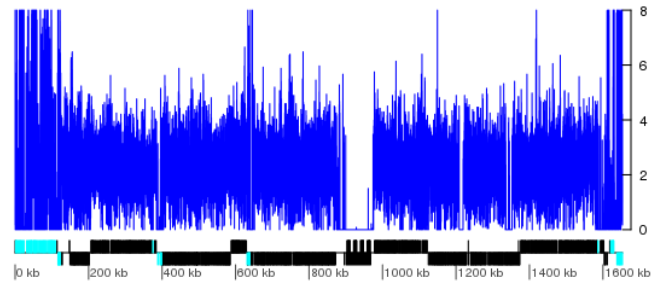

STIB704C-Tb927.04\_v5.1

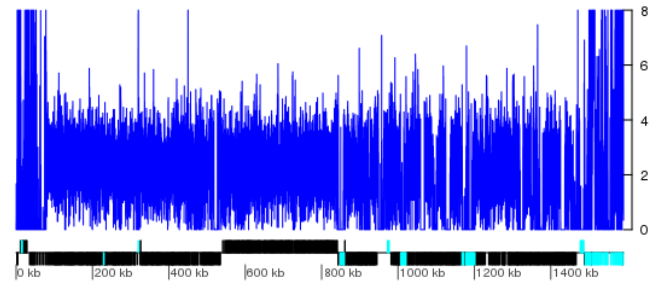

STIB704C-Tb927.05\_v5.1

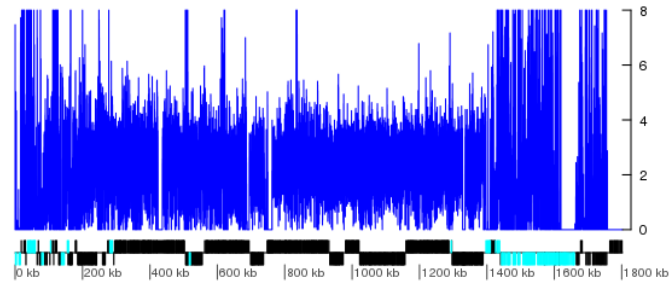

STIB704C-Tb927.06\_v5.1

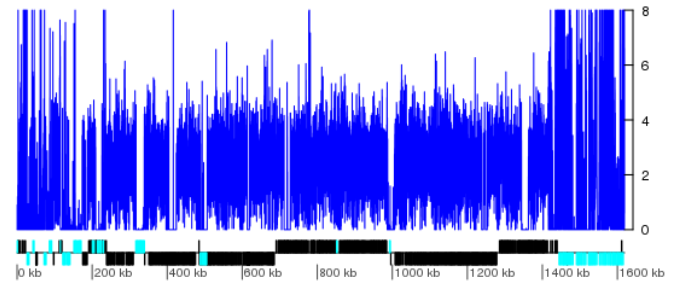

STIB704C-Tb927.07\_v5.1

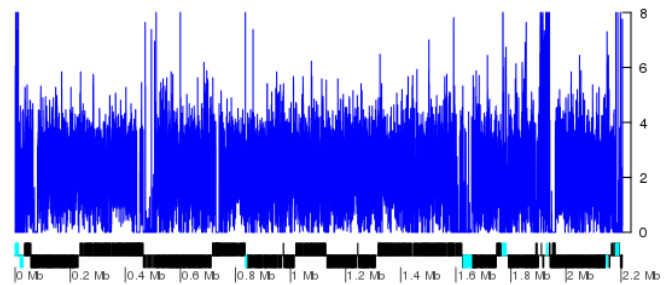

STIB704C-Tb927.08\_v5.1

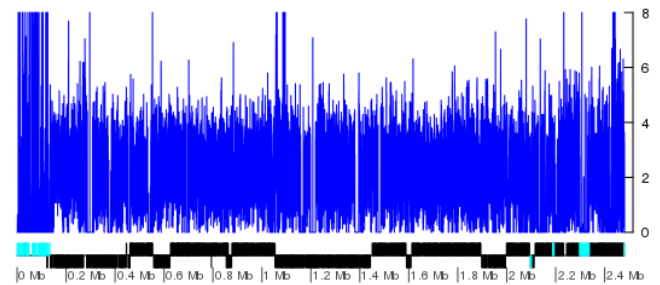

STIB704C-Tb927.09\_v5.1

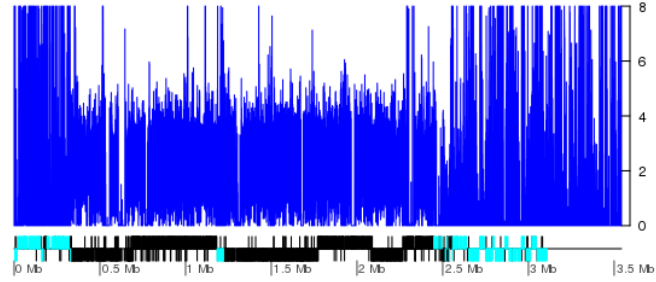

STIB704C-Tb927.10\_v5.1

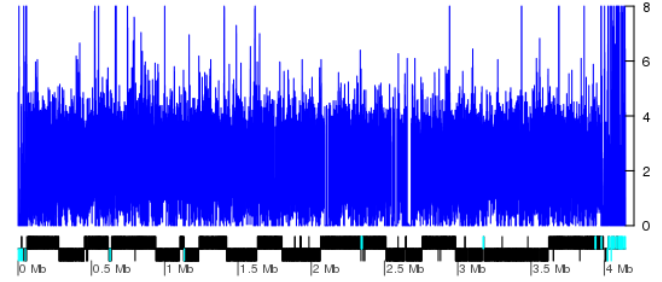

STIB704C-Tb927.11\_v5.1

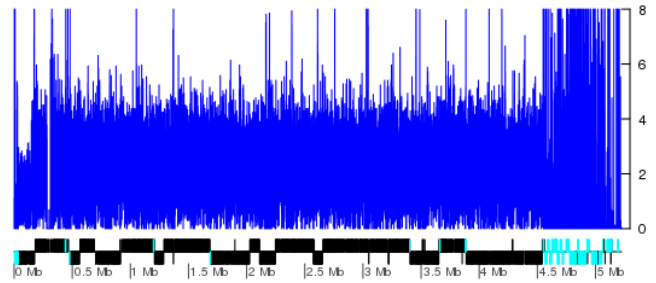

Isolate  
STIB900

STIB900-Tb927.01\_v5.1

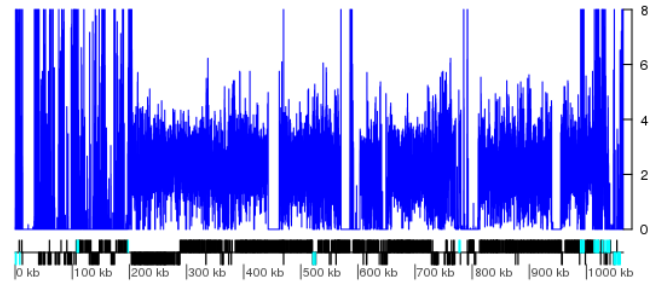

STIB900-Tb927.02\_v5.1

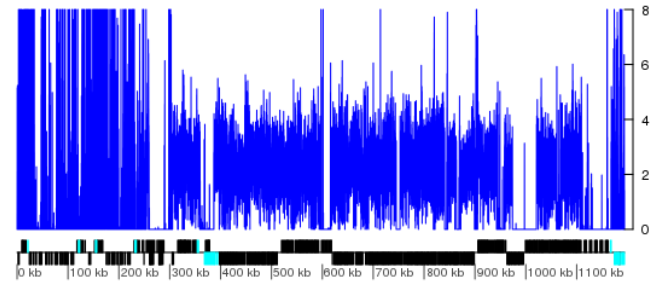

STIB900-Tb927.03\_v5.1

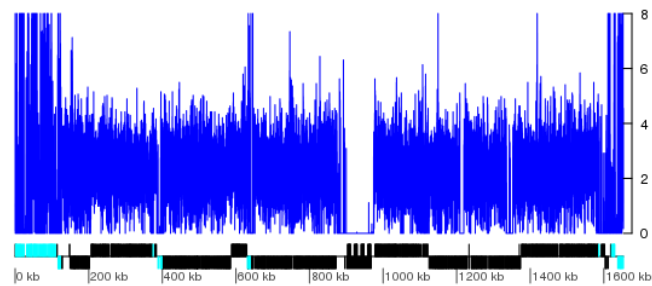

STIB900-Tb927.04\_v5.1

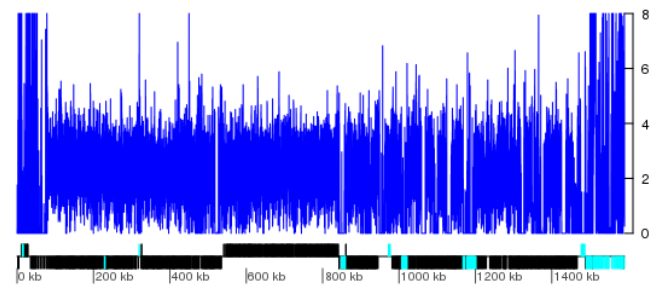



STIB900-Tb927.05\_v5.1

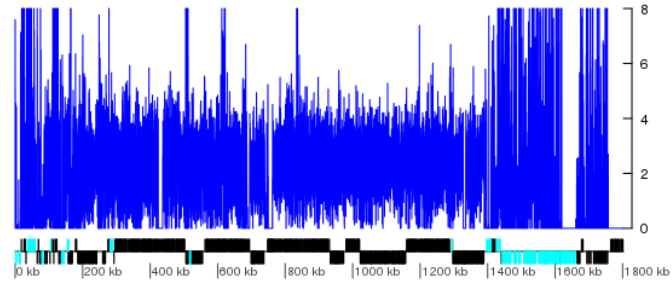

STIB900-Tb927.06\_v5.1

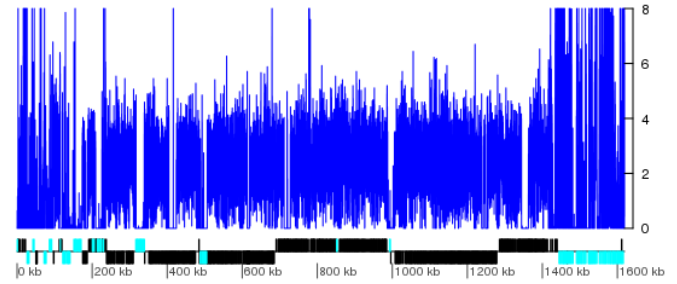

STIB900-Tb927.07\_v5.1

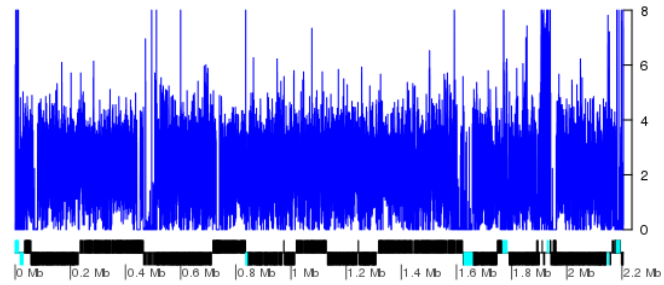

STIB900-Tb927.08\_v5.1

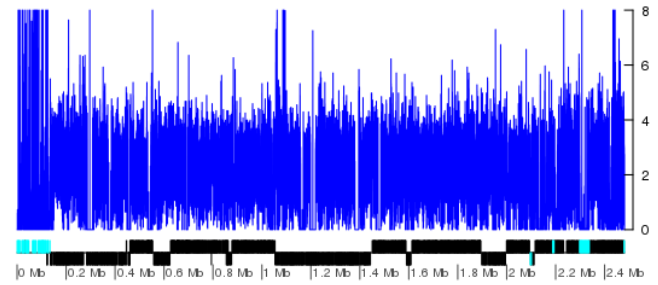

STIB900-Tb927.09\_v5.1

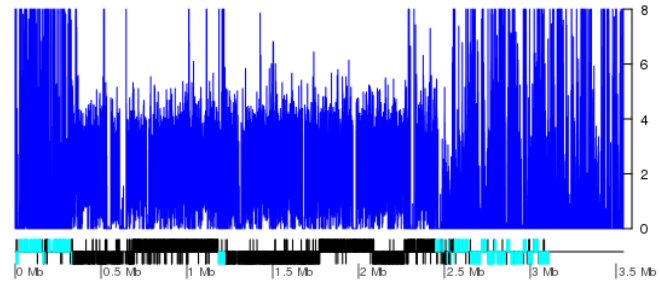

STIB900-Tb927.10\_v5.1

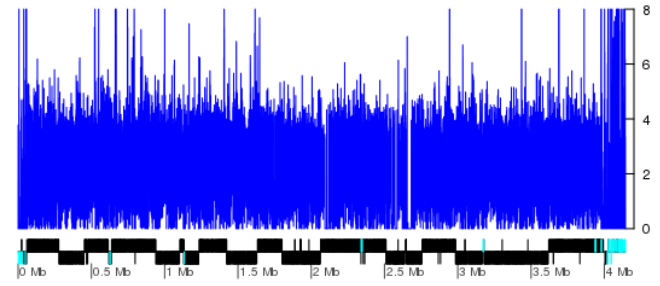

STIB900-Tb927.11\_v5.1

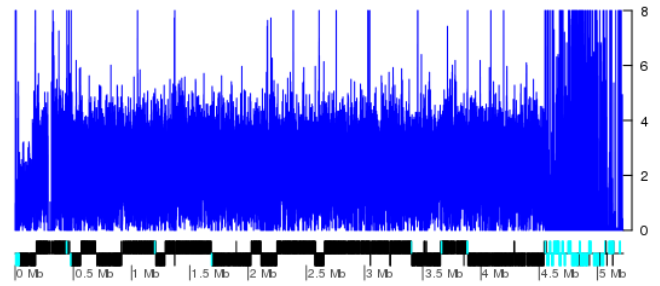

Isolate  
STIB920

STIB920-Tb927.01\_v5.1

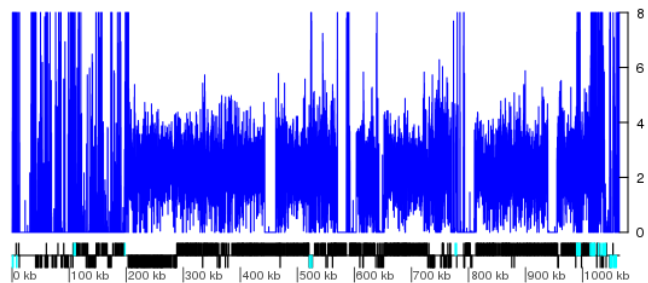

STIB920-Tb927.02\_v5.1

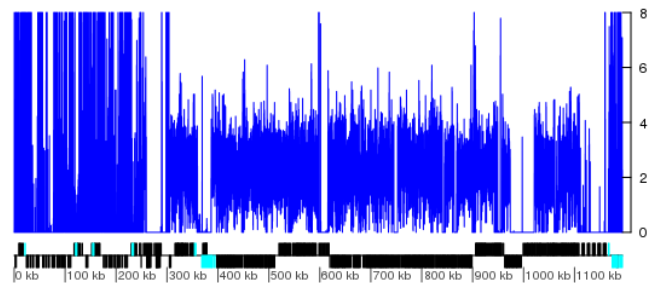

STIB920-Tb927.03\_v5.1

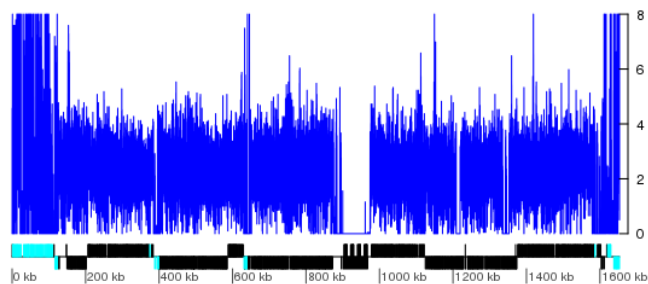

STIB920-Tb927.04\_v5.1

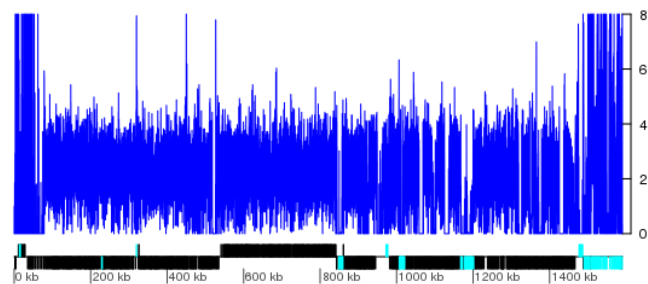

STIB920-Tb927.05\_v5.1

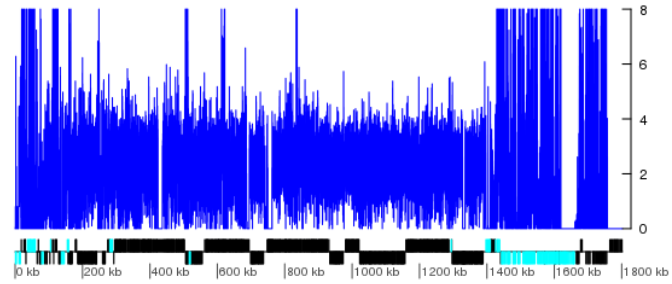

STIB920-Tb927.06\_v5.1

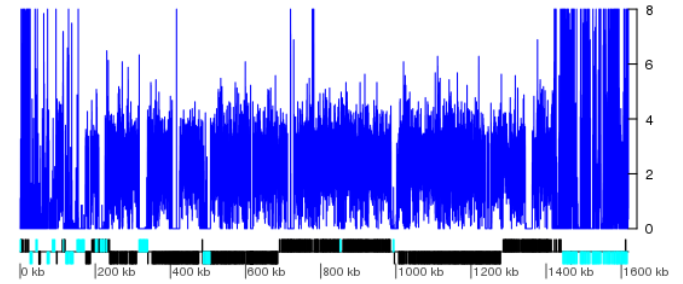

STIB920-Tb927.07\_v5.1

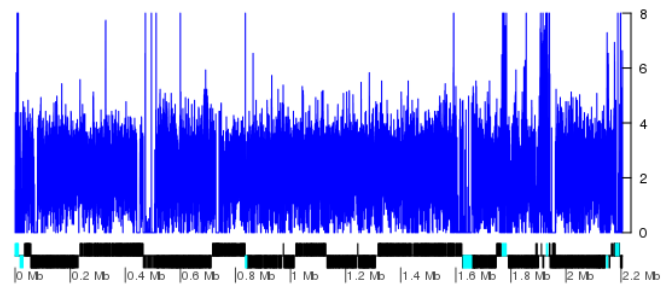

STIB920-Tb927.08\_v5.1

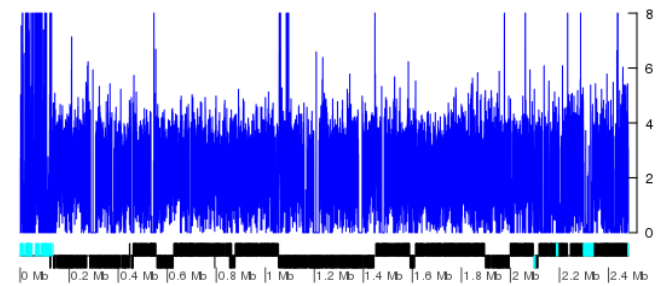

STIB920-Tb927.09\_v5.1

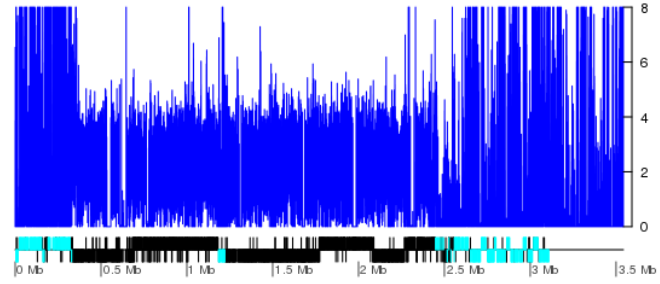

STIB920-Tb927.10\_v5.1

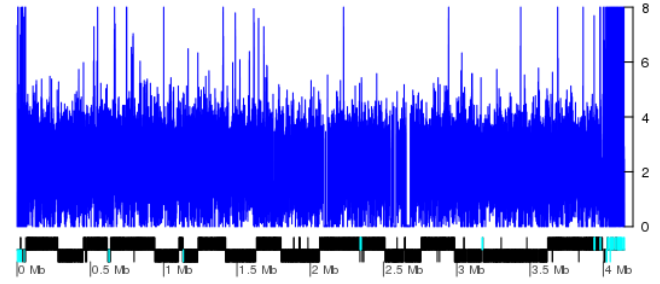

STIB920-Tb927.11\_v5.1

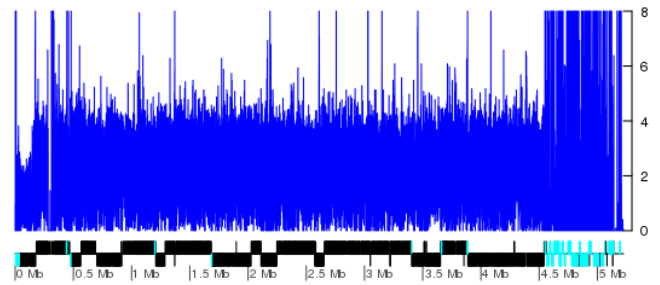

Isolate

ytat

ytat-Tb927.01\_v5.1

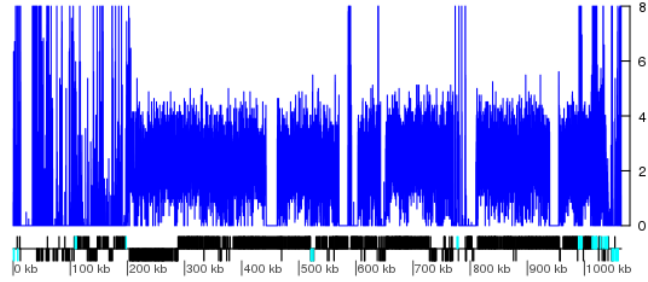

ytat-Tb927.02\_v5.1

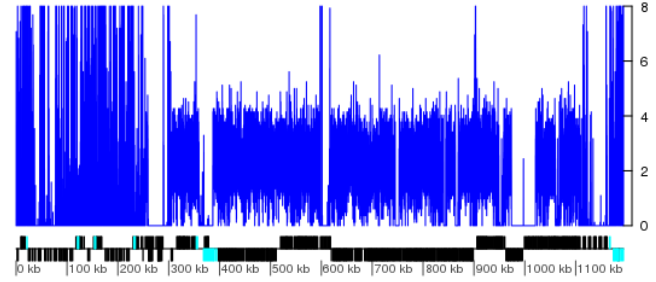

ytat-Tb927.03\_v5.1

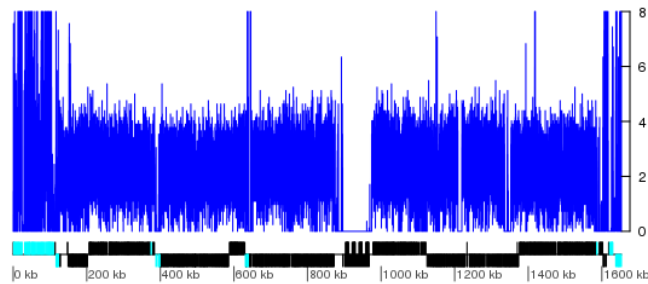

ytat-Tb927.04\_v5.1

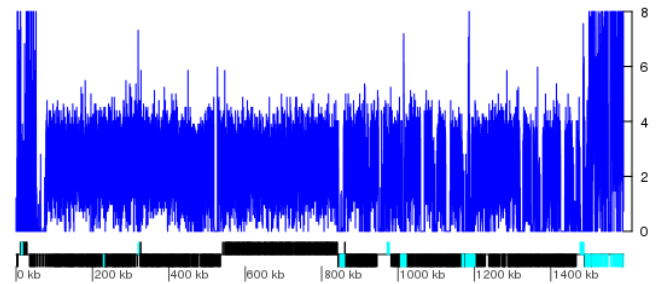



ytat-Tb927.05\_v5.1

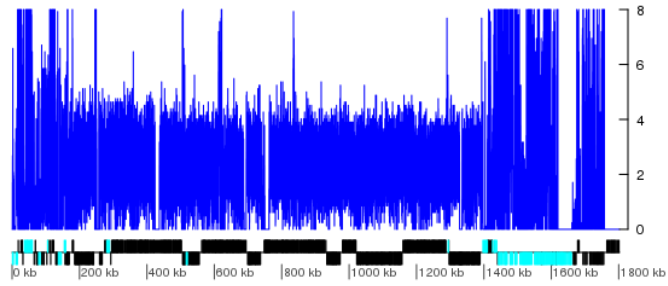

ytat-Tb927.06\_v5.1

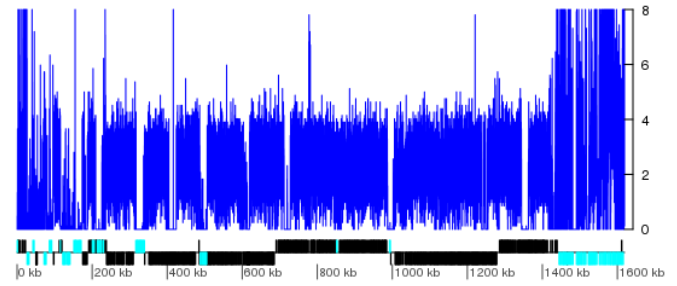

ytat-Tb927.07\_v5.1

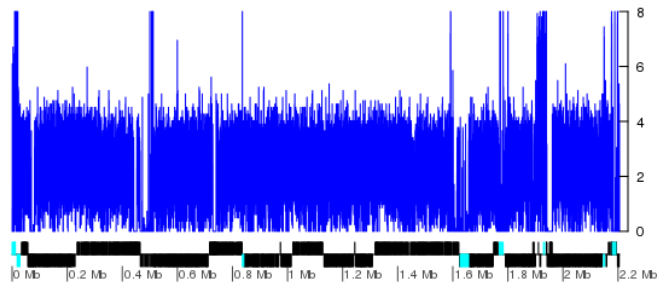

ytat-Tb927.08\_v5.1

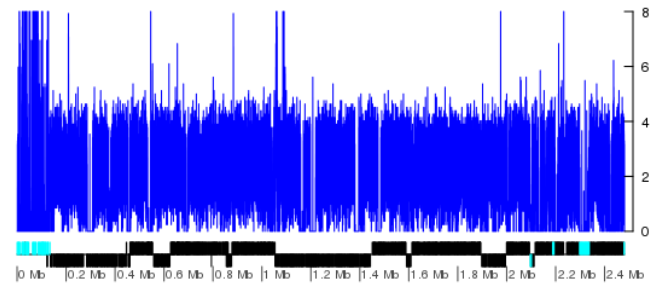

ytat-Tb927.09\_v5.1

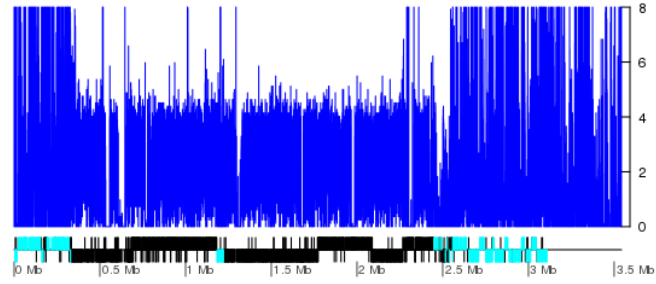

ytat-Tb927.10\_v5.1

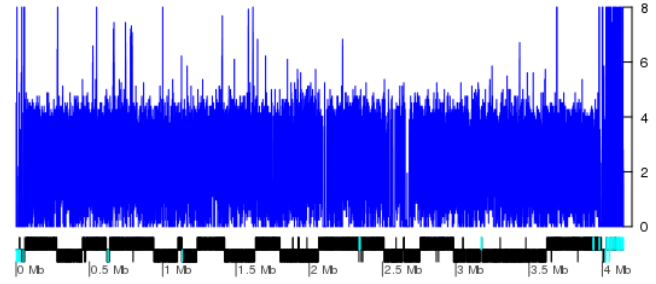

ytat-Tb927.11\_v5.1

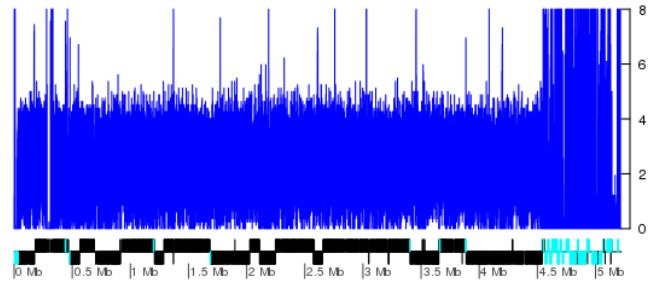

Supplement: mgen-4-223-s001.pdf [file mgen-4-223-s001.pdf]
